# Supplementary material for: Catalytic asymmetric hydroboration of β,γ-unsaturated Weinreb amides: striking influence of the borane
Source: Royal Society of Chemistry journal article supplement (doi:10.1039/c1cc11746g), 2011-01-01

Supporting Information for:

**Catalytic Asymmetric Hydroboration of  $\beta,\gamma$ -Unsaturated Weinreb Amides: Surprising Influence of the Borane.**

Sean M. Smith, Maulen Uteuliyev, and James M. Takacs\*

Department of Chemistry, University of Nebraska-Lincoln, Lincoln, NE 68588-0304

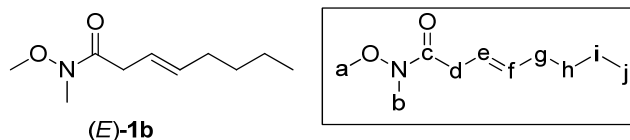

The general procedure for the synthesis of  $\beta,\gamma$ -unsaturated Weinreb amides affords, after flash chromatography on silica gel (85:15 hexanes:ethyl acetate), the title compound (85%) as a colorless oil.

|                                                                             |                                                                                                                                                                                        |
|-----------------------------------------------------------------------------|----------------------------------------------------------------------------------------------------------------------------------------------------------------------------------------|
| <b>TLC analysis</b>                                                         | $R_f$ 0.6 (50:50 hexanes:ethyl acetate)                                                                                                                                                |
| <b><math>^1\text{H}</math> NMR (400 MHz, <math>\text{CDCl}_3</math>)</b>    | $\delta$ 5.60–5.40 (2H, m, e,f), 3.65 (3H, s, a), 3.15–3.05 (2H, suspected d, d), 2.05–1.95 (2H, m, g), 1.40–1.20 (4H, m, h,i), 0.84 (3H, t, $J = 7.0$ Hz, j).                         |
| <b><math>^{13}\text{C}</math> NMR (100 MHz, <math>\text{CDCl}_3</math>)</b> | $\delta$ 173.08 (c), 134.36 (f), 122.22 (e), 61.24 (a), 36.08 (d), 32.19 (g), 32.08 (b), 31.34 (h), 22.15 (i), 13.87 (j).                                                              |
| <b>IR (neat)</b>                                                            | 2958 (CH $\text{sp}^2$ stretch), 2929 (CH $\text{sp}^3$ stretch), 2873, 1667 (C=O stretch), 1465, 1414, 1379 (C-N stretch), 1175, 1102 (C-O stretch), 999, 969, 933 $\text{cm}^{-1}$ . |
| <b>HRMS (CI)</b>                                                            | Calcd. for $\text{C}_{10}\text{H}_{20}\text{NO}_2$ (M+H): 186.1494, found 186.1488 $m/z$ .                                                                                             |

**$^1\text{H}$  NMR of (*E*)-1b**

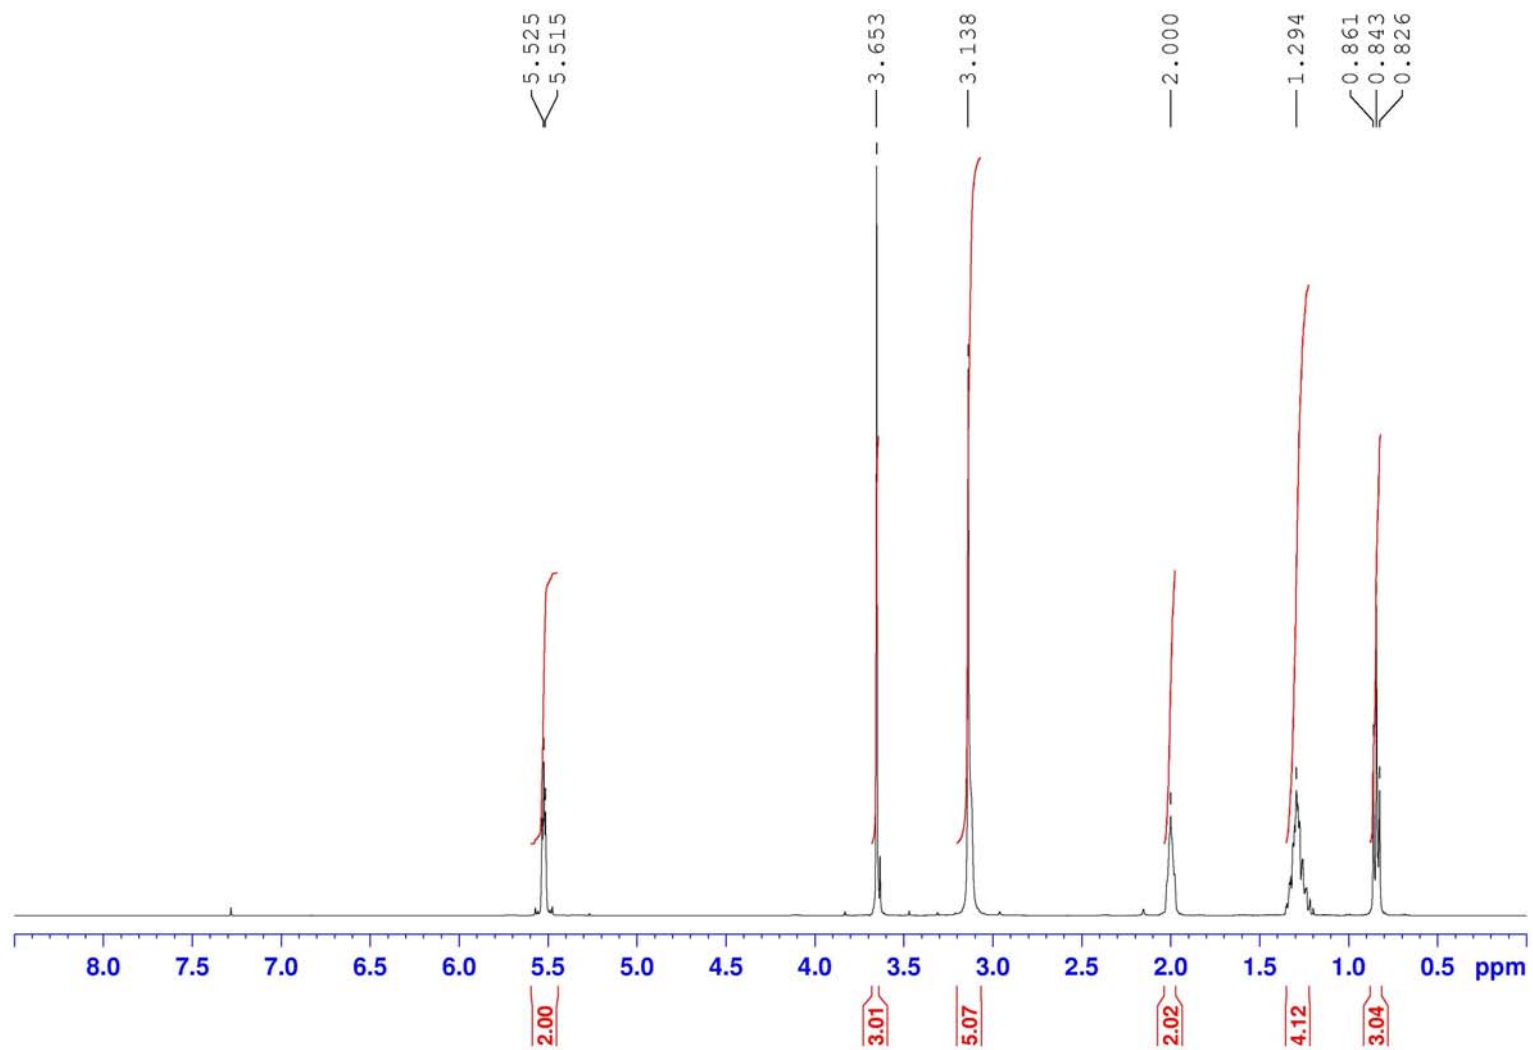

**$^{13}\text{C}$  NMR of (*E*)-1b**

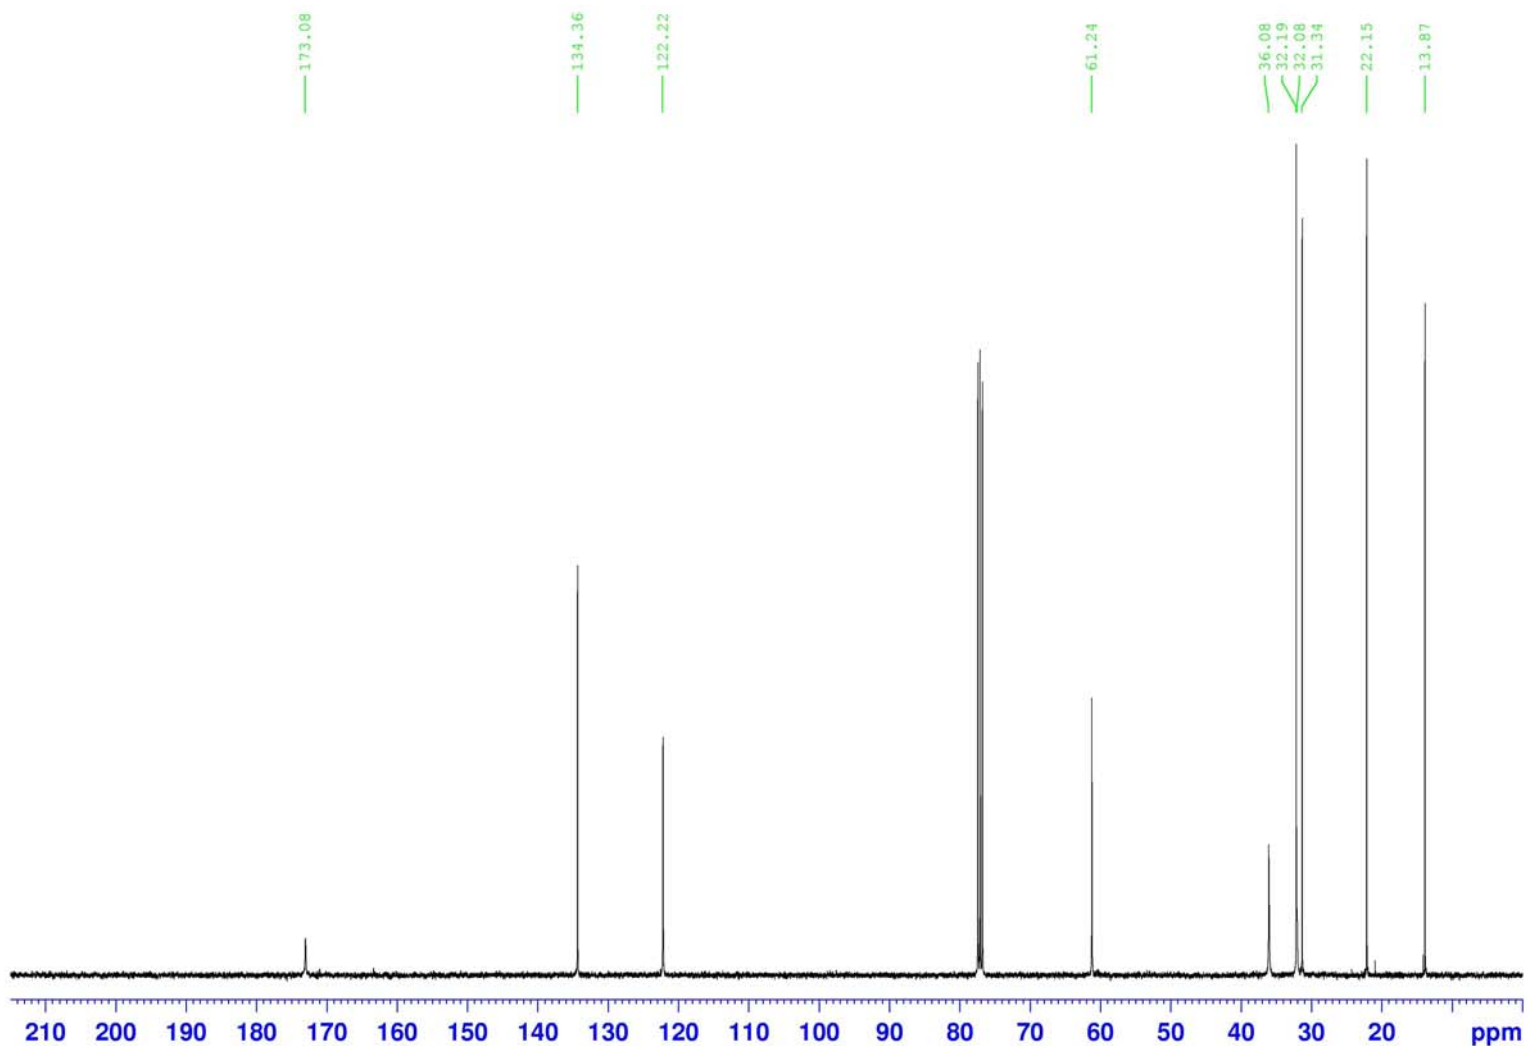

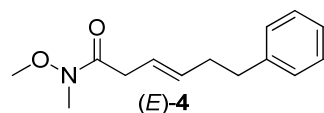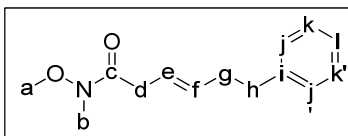

The general procedure for the synthesis of  $\beta,\gamma$ -unsaturated Weinreb amides affords, after flash chromatography on silica gel (85:15 hexanes:ethyl acetate), the title compound (78%) as a colorless oil.

|                                                                             |                                                                                                                                                                                                             |
|-----------------------------------------------------------------------------|-------------------------------------------------------------------------------------------------------------------------------------------------------------------------------------------------------------|
| <b>TLC analysis</b>                                                         | $R_f$ 0.60 (50:50 hexanes:ethyl acetate)                                                                                                                                                                    |
| <b><math>^1\text{H}</math> NMR (400 MHz, <math>\text{CDCl}_3</math>)</b>    | $\delta$ 7.35–7.25 (2H, m, k,k'), 7.25–7.15 (3H, m, j,j',l), 5.20–5.10 (2H, m, e,f), 3.68 (3H, s, a), 3.15–3.05 (2H, suspected d, d), 3.20 (3H, s, b), 2.72 (2H, t, $J = 7.5$ Hz, h), 2.45–2.35 (2H, m, g). |
| <b><math>^{13}\text{C}</math> NMR (100 MHz, <math>\text{CDCl}_3</math>)</b> | $\delta$ 172.95 (c), 141.88 (i), 133.37 (f), 128.45 (j,j'), 128.30 (k,k'), 125.80 (l), 123.11 (e), 61.32 (a), 36.06 (d), 35.68 (h), 34.36 (g), 32.15 (b).                                                   |
| <b>IR (neat)</b>                                                            | 3026 (CH $\text{sp}^2$ stretch), 2936 (CH $\text{sp}^3$ stretch), 1657 (C=O stretch), 1454, 1382 (C-N stretch), 1176, 1108 (C-O stretch), 1000, 967, 746, 699 $\text{cm}^{-1}$ .                            |
| <b>HRMS (CI)</b>                                                            | Calcd. for $\text{C}_{14}\text{H}_{20}\text{NO}_2$ (M+H): 234.1495, found 234.1504 $m/z$ .                                                                                                                  |

**$^1\text{H}$  NMR of (*E*)-4**

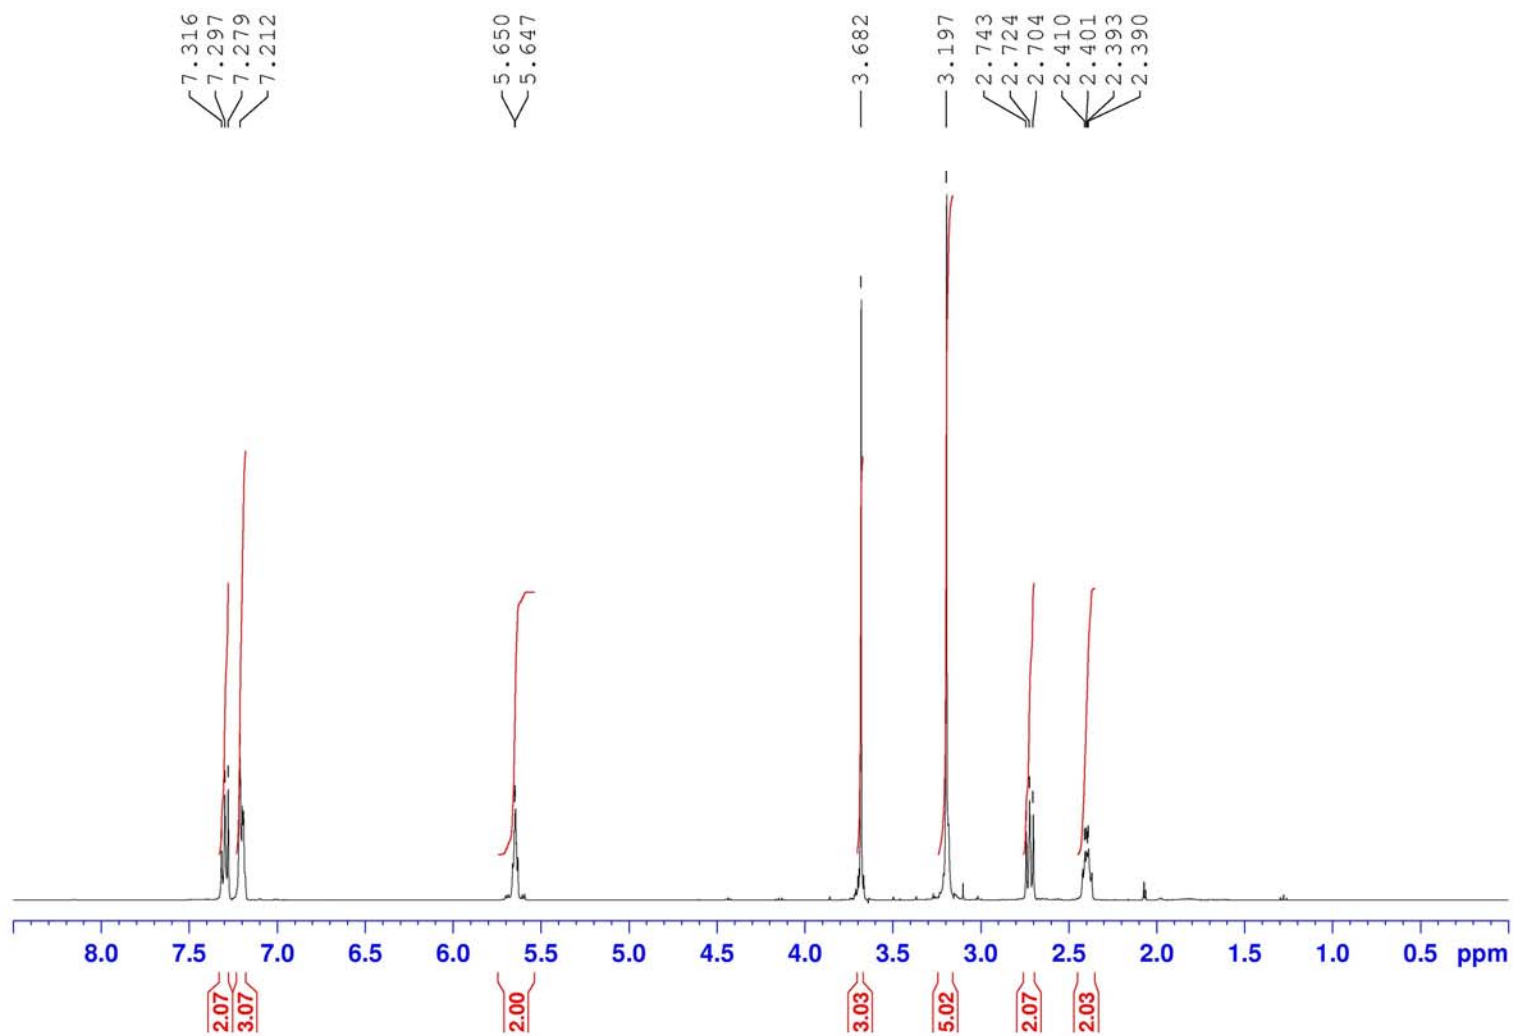

**$^{13}\text{C}$  NMR of (*E*)-4**

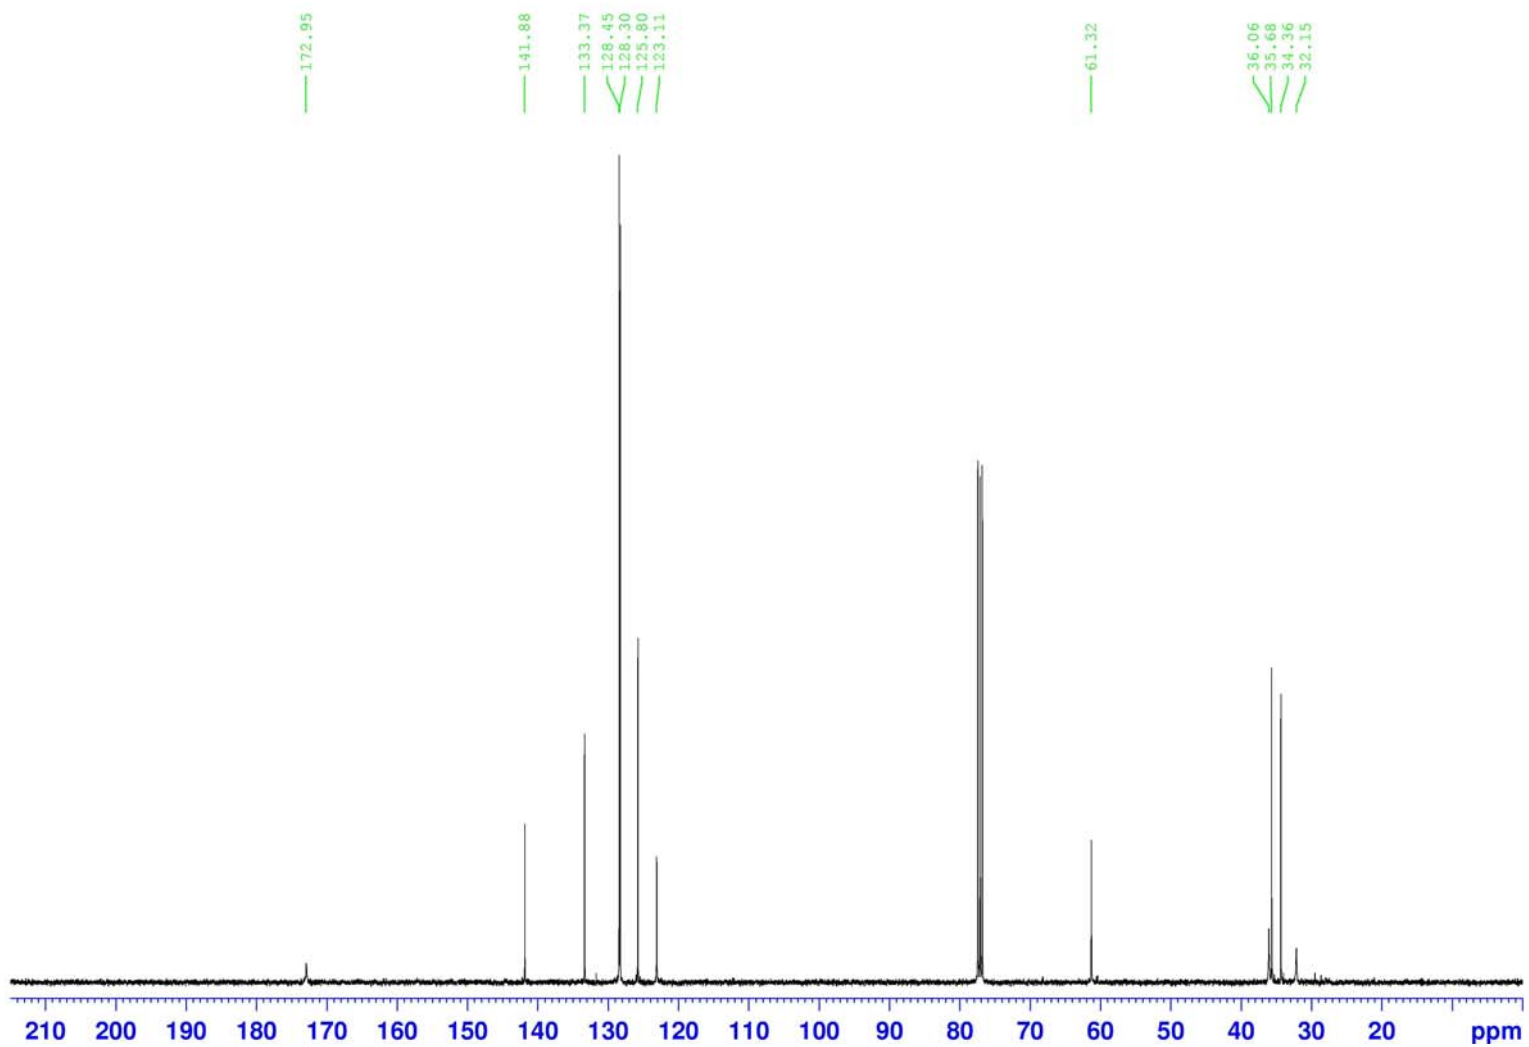

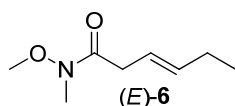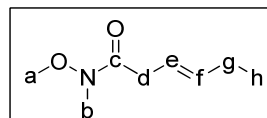

The general procedure for the synthesis of  $\beta,\gamma$ -unsaturated Weinreb amides affords, after flash chromatography on silica gel (85:15 hexanes:ethyl acetate), the title compound (83%) as a colorless oil.

|                                                                             |                                                                                                                                                                                             |
|-----------------------------------------------------------------------------|---------------------------------------------------------------------------------------------------------------------------------------------------------------------------------------------|
| <b>TLC analysis</b>                                                         | $R_f$ 0.5 (50:50 hexanes:ethyl acetate)                                                                                                                                                     |
| <b><math>^1\text{H}</math> NMR (400 MHz, <math>\text{CDCl}_3</math>)</b>    | $\delta$ 5.60–5.40 (2H, m, e,f), 3.66 (3H, s, a), 3.15–3.10 (2H, suspected d, d), 3.14 (3H, s, b), 2.05–1.95 (2H, m, g), 0.95 (3H, t, $J = 7.4$ Hz, h).                                     |
| <b><math>^{13}\text{C}</math> NMR (100 MHz, <math>\text{CDCl}_3</math>)</b> | $\delta$ 173.11 (c), 135.88 (f), 121.30 (e), 61.26 (a), 36.00 (d), 32.09 (b), 25.52 (g), 13.45 (h).                                                                                         |
| <b>IR (neat)</b>                                                            | 2964 (CH $\text{sp}^2$ stretch), 2937 (CH $\text{sp}^3$ stretch), 1660 (C=O stretch), 1462, 1411, 1381 (C-N stretch), 1175, 1102, 1013 (C-O stretch), 967, 937, 820, 780 $\text{cm}^{-1}$ . |
| <b>HRMS (CI)</b>                                                            | Calcd. for $\text{C}_8\text{H}_{16}\text{NO}_2$ (M+H): 158.1181, found 158.1176 $m/z$ .                                                                                                     |



$^1\text{H}$  NMR of (*E*)-6

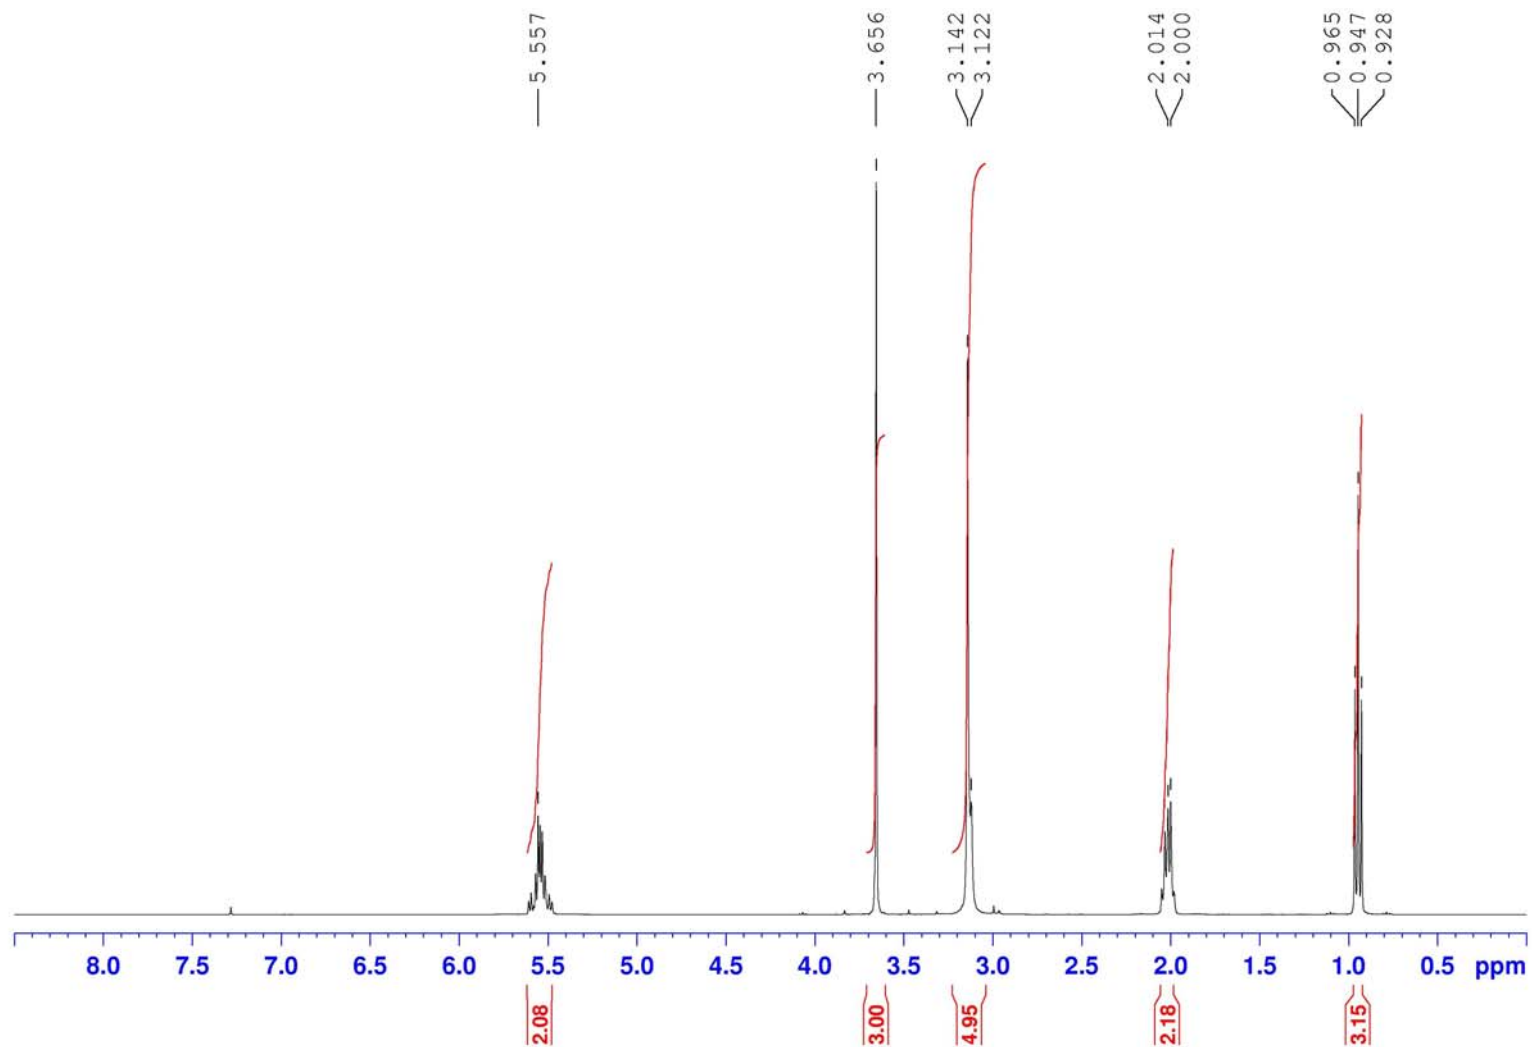

**$^{13}\text{C}$  NMR of (*E*)-6**

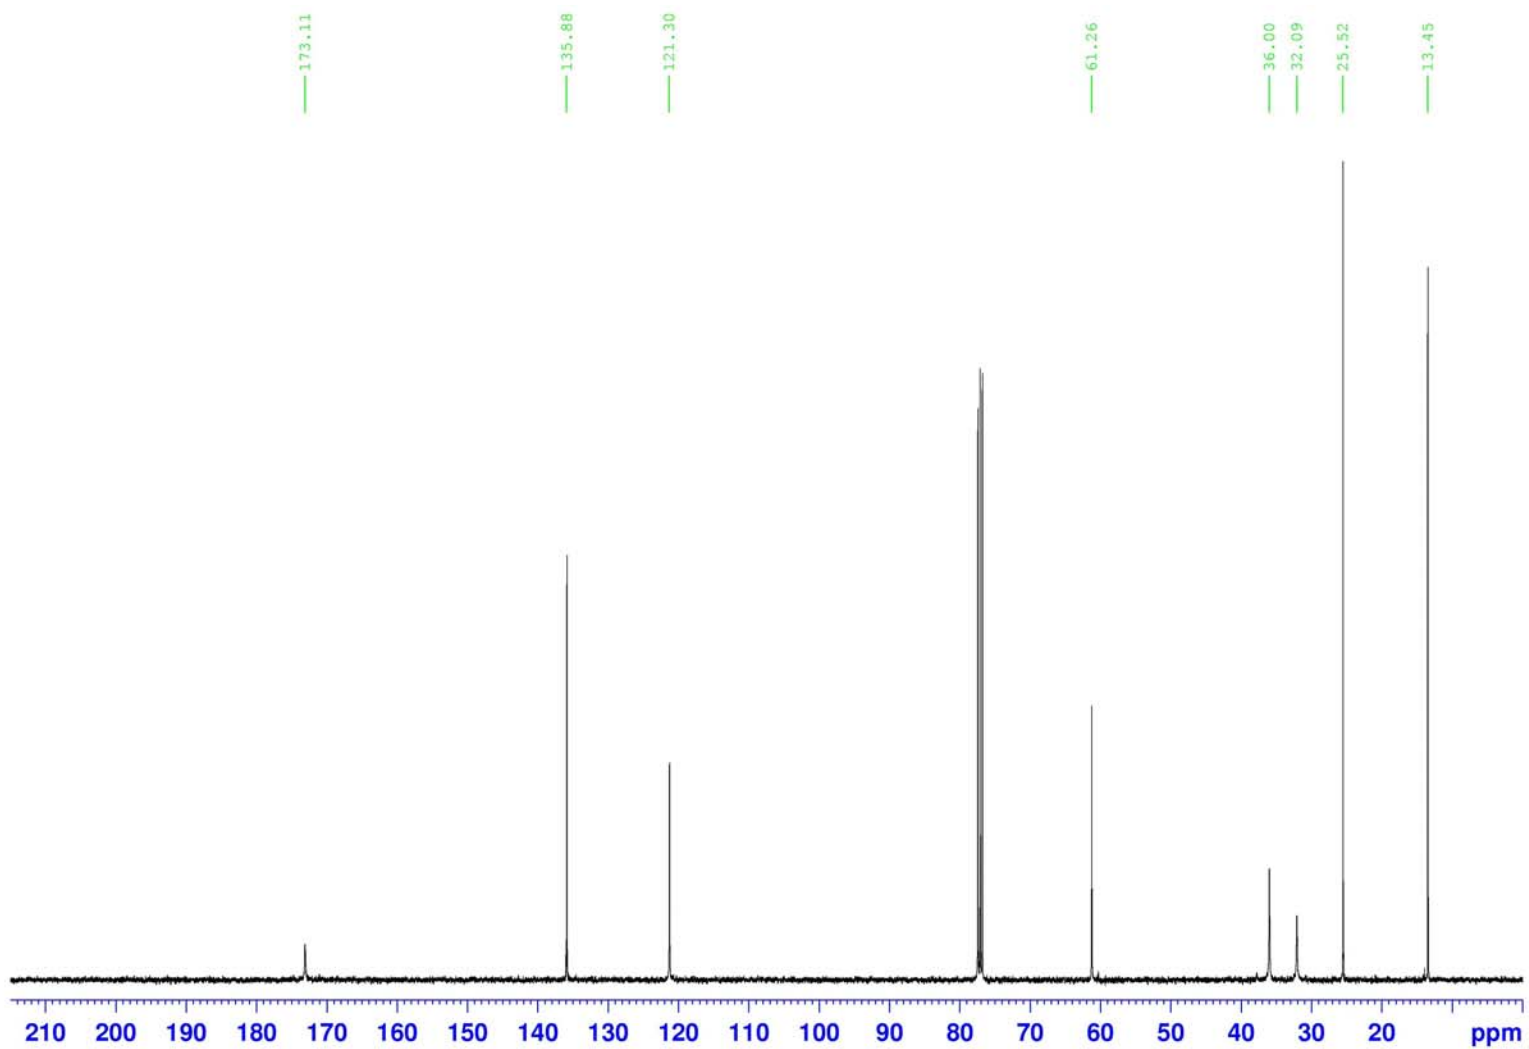

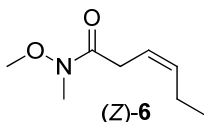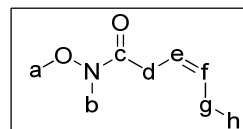

The general procedure for the synthesis of  $\beta,\gamma$ -unsaturated Weinreb amides affords, after flash chromatography on silica gel (85:15 hexanes:ethyl acetate), the title compound (80%) as a colorless oil.

|                                                                             |                                                                                                                                                                                       |
|-----------------------------------------------------------------------------|---------------------------------------------------------------------------------------------------------------------------------------------------------------------------------------|
| <b>TLC analysis</b>                                                         | $R_f$ 0.5 (50:50 hexanes:ethyl acetate)                                                                                                                                               |
| <b><math>^1\text{H}</math> NMR (400 MHz, <math>\text{CDCl}_3</math>)</b>    | $\delta$ 5.60–5.50 (2H, m, e,f), 3.70 (3H, s, a), 3.21 (2H, d, $J$ = 4.9 Hz, d), 3.18 (3H, s, b), 2.15–2.05 (2H, m, g), 0.99 (3H, t, $J$ = 7.5 Hz, h).                                |
| <b><math>^{13}\text{C}</math> NMR (100 MHz, <math>\text{CDCl}_3</math>)</b> | $\delta$ 172.93 (c), 134.61 (f), 120.91 (e), 61.24 (a), 32.22 (b), 30.89 (d), 20.81 (g), 13.95 (h).                                                                                   |
| <b>IR (neat)</b>                                                            | 2965 (CH $\text{sp}^2$ stretch), 2937 (CH $\text{sp}^3$ stretch), 1665 (C=O stretch), 1463, 1376 (C-N stretch), 1241, 1176, 1119 (C-O stretch), 989, 924, 785, 703 $\text{cm}^{-1}$ . |
| <b>HRMS (CI)</b>                                                            | Calcd. for $\text{C}_8\text{H}_{16}\text{NO}_2$ (M+H): 158.1181, found 158.1176 $m/z$ .                                                                                               |

**$^1\text{H}$  NMR of (Z)-6**

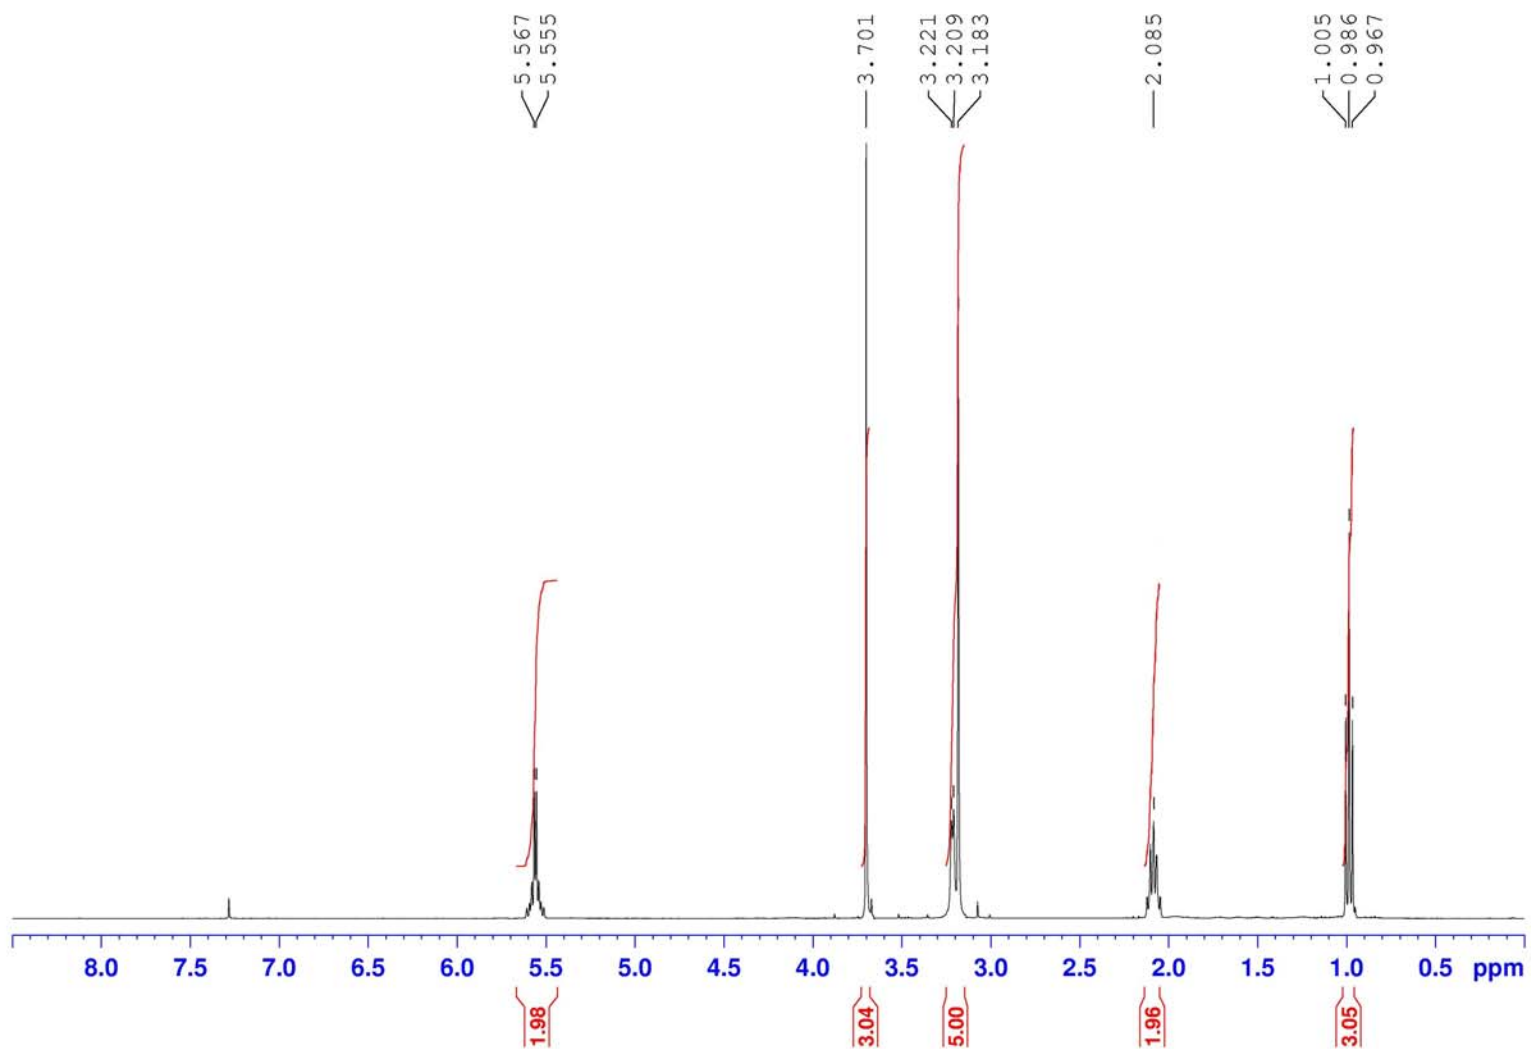

$^{13}\text{C}$  NMR of (Z)-6

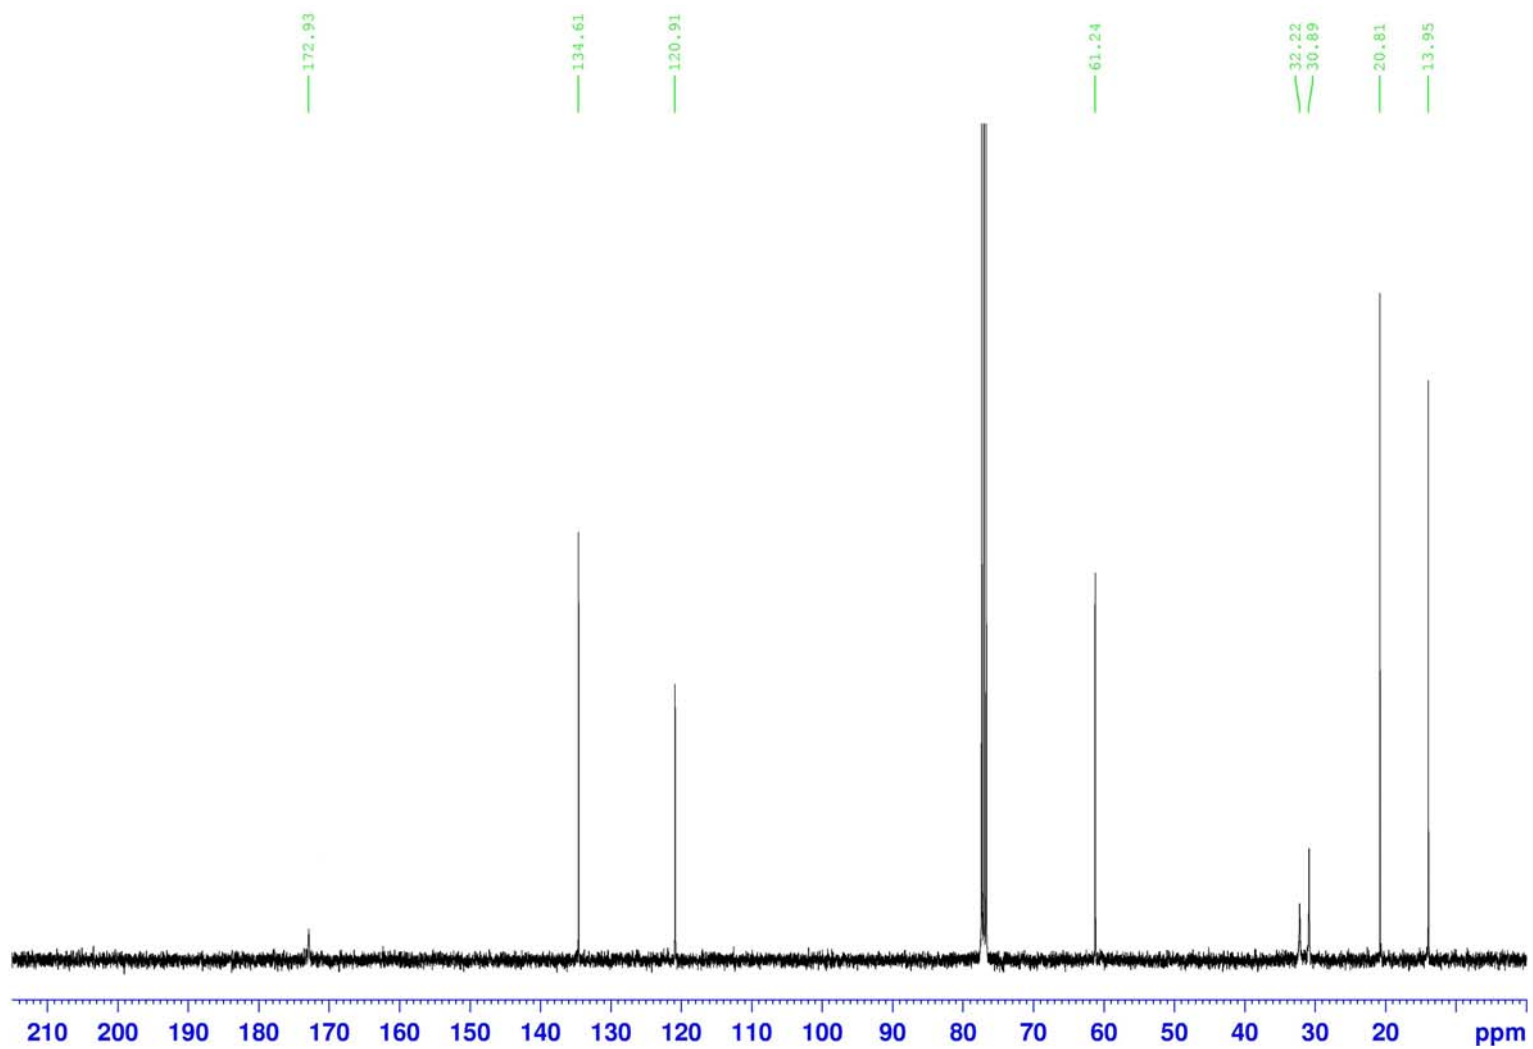

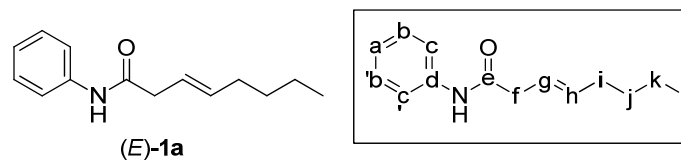

The general procedure for the synthesis of  $\beta,\gamma$ -unsaturated phenyl amides affords, after flash chromatography on silica gel (75:25 hexanes:ethyl acetate), the title compound (85%) as a colorless oil.

|                                                                             |                                                                                                                                                                                                                                                                       |
|-----------------------------------------------------------------------------|-----------------------------------------------------------------------------------------------------------------------------------------------------------------------------------------------------------------------------------------------------------------------|
| <b>m.p.</b>                                                                 | 47–49 °C                                                                                                                                                                                                                                                              |
| <b>TLC analysis</b>                                                         | $R_f$ 0.54 (75:25 hexanes:ethyl acetate)                                                                                                                                                                                                                              |
| <b><math>^1\text{H}</math> NMR (400 MHz, <math>\text{CDCl}_3</math>)</b>    | $\delta$ 7.85 (1H, br s, NH), 7.54 (2H, d, $J$ = 8.0 Hz, c,c'), 7.31 (2H, t, $J$ = 7.8 Hz, b,b'), 7.11 (1H, t, $J$ = 7.4 Hz, a), 5.76–5.59 (2H, m, g,h), 3.12 (2H, d, $J$ = 6.7 Hz, f), 2.14–2.08 (2H, m, i), 1.44–1.33 (4H, m, j,k), 0.94 (3H, t, $J$ = 7.01 Hz, l). |
| <b><math>^{13}\text{C}</math> NMR (100 MHz, <math>\text{CDCl}_3</math>)</b> | $\delta$ 169.58 (e), 137.85 (d), 137.49 (g), 128.98 (b,b'), 124.20 (a), 122.29 (h), 119.72 (c,c'), 41.63 (f), 32.27 (i), 31.31 (j), 22.25 (k), 13.91 (l).                                                                                                             |
| <b>IR (neat)</b>                                                            | 3292 (N-H stretch), 2948, 2923, 2864, 6959, 1596, 1525 (N-H bend), 1498, 1440, 1357, 1250, 1187 $\text{cm}^{-1}$ .                                                                                                                                                    |
| <b>HRMS (FAB)</b>                                                           | Calcd. for $\text{C}_{14}\text{H}_{19}\text{NO}$ (M+H): 218.1545, found 218.1536 $m/z$ .                                                                                                                                                                              |

### $^1\text{H}$ NMR of (*E*)-1a

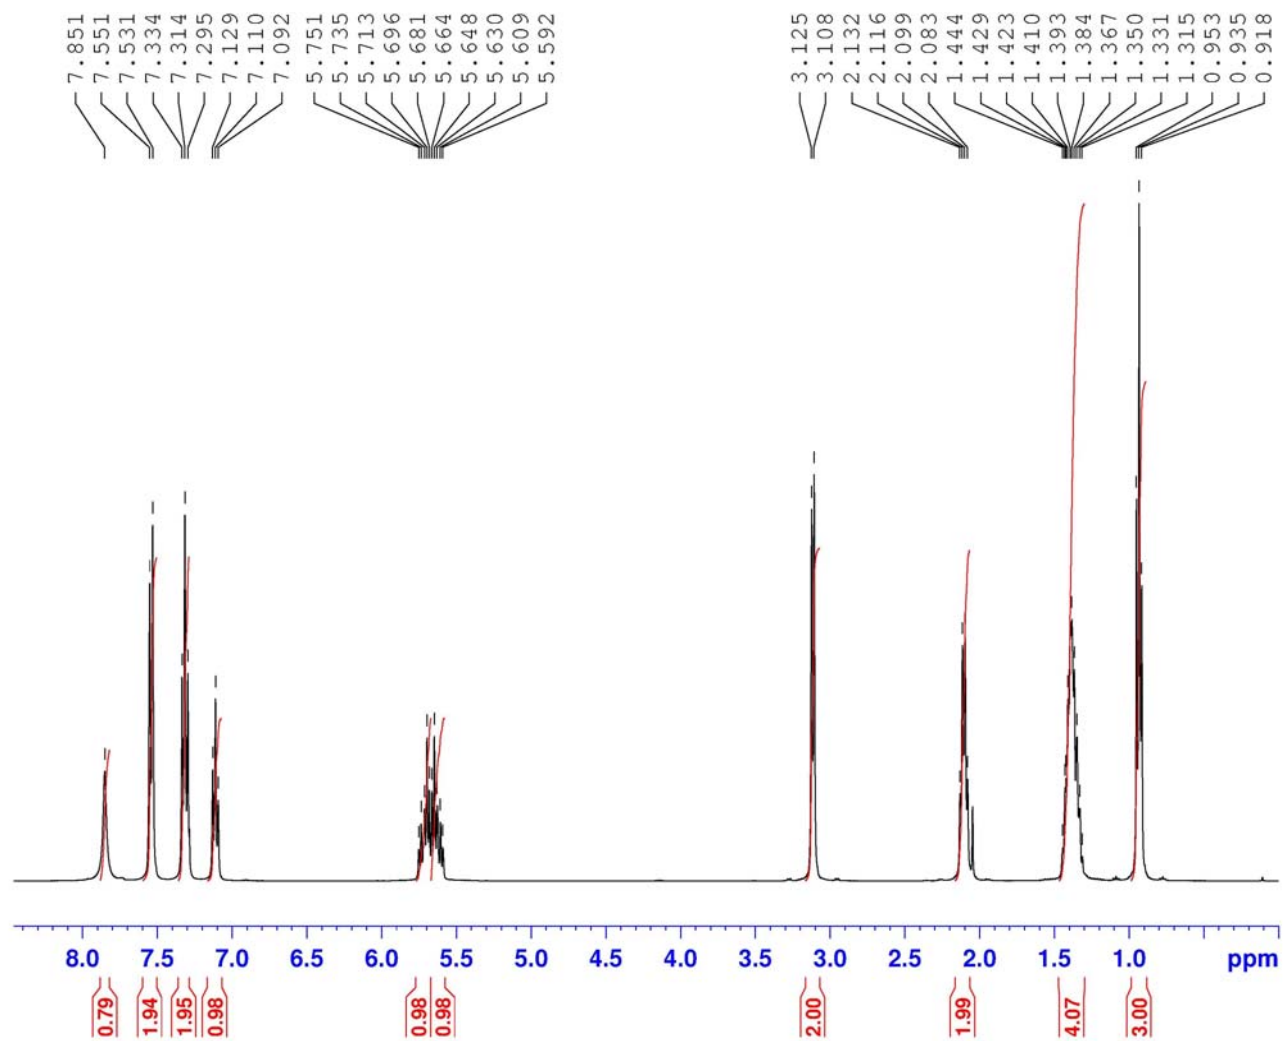

**$^{13}\text{C}$  NMR of (*E*)-1a**

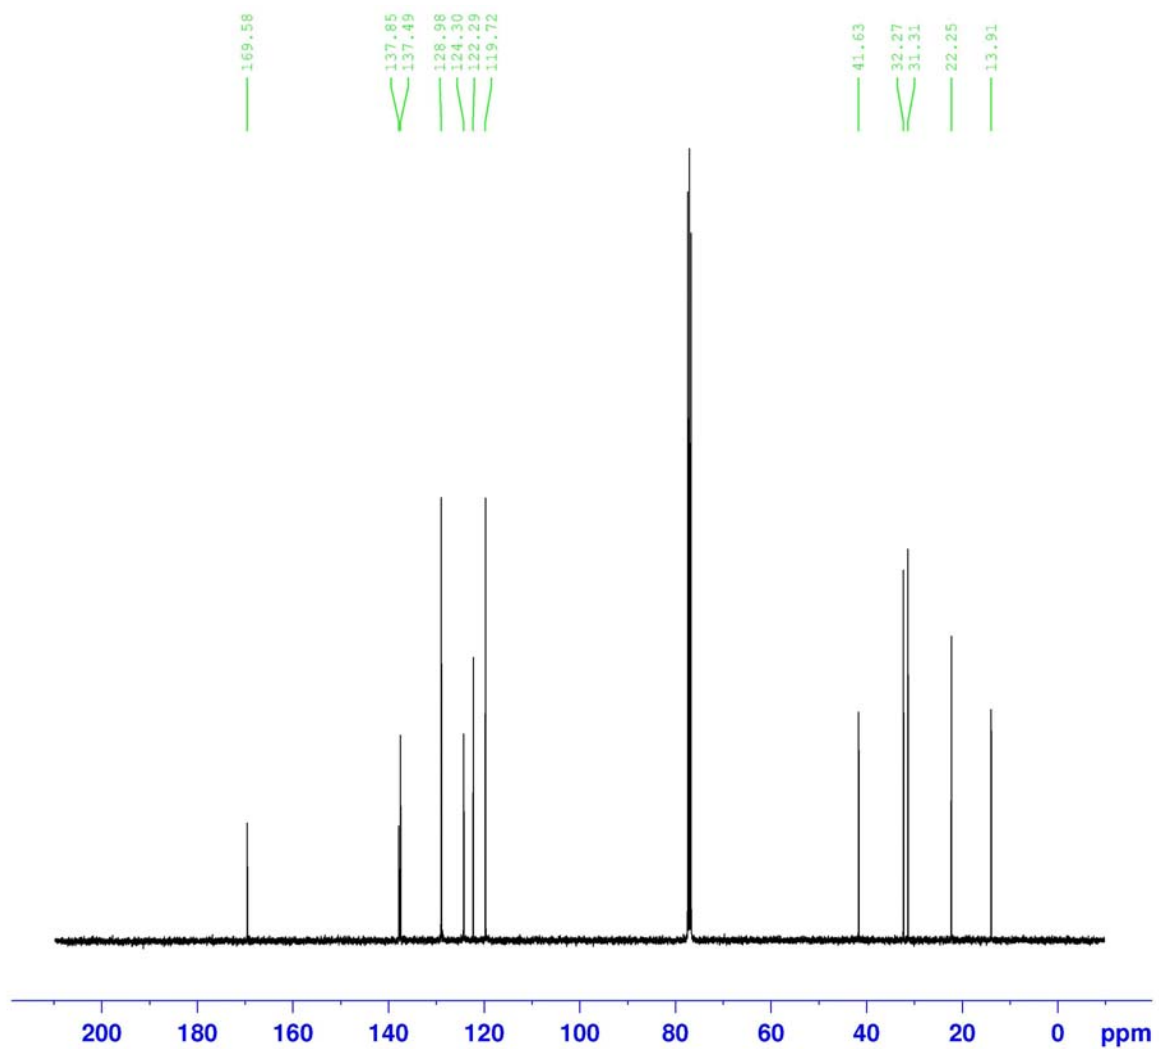



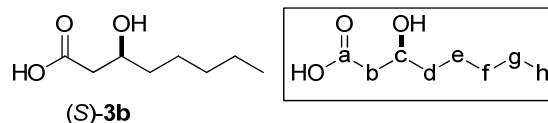

Catalytic asymmetric hydroboration of (*E*)-**1b** affords, after flash chromatography on silica gel (60:40 hexanes:ethyl acetate), the title compound (81%) as a colorless oil.

|                                                                            |                                                                                                                                                                                                                                     |
|----------------------------------------------------------------------------|-------------------------------------------------------------------------------------------------------------------------------------------------------------------------------------------------------------------------------------|
| <b>TLC analysis</b>                                                        | $R_f$ 0.4 (30:70 hexanes:ethyl acetate)                                                                                                                                                                                             |
| <b>Optical rotation</b>                                                    | $[\alpha]_D^{20} = +14.2^\circ$ ( $c$ 0.5, $\text{CHCl}_3$ )                                                                                                                                                                        |
| <b><math>^1\text{H}</math> NMR (300 MHz, <math>\text{CDCl}_3</math>)</b>   | $\delta$ 7.37 (2H, br s, COOH, OH), 4.10–4.00 (1H, m, c), 2.57 and 2.47 (2H, overlapping dd's, $J_1 = 16.5$ Hz, 3.3 Hz, $J_2 = 16.5$ Hz, 8.8 Hz, b), 1.60–1.40 (2H, m, d), 1.40–1.20 (6H, m, e,f,g), 0.90 (3H, t, $J = 6.5$ Hz, h). |
| <b><math>^{13}\text{C}</math> NMR (75 MHz, <math>\text{CDCl}_3</math>)</b> | $\delta$ 177.94 (a), 68.08 (c), 41.09 (b), 36.39 (d), 31.64 (e), 25.11 (f), 22.56 (g), 14.00 (h).                                                                                                                                   |
| <b>IR (neat)</b>                                                           | 3391 (OH stretch), 2930, 2860 (CH $\text{sp}^3$ stretch), 1709 (C=O stretch), 1378 (C- N stretch), 1156, 1126, 1080 (C-O stretch), 1044, 950, 883, 828 $\text{cm}^{-1}$ .                                                           |

### $^1\text{H}$ NMR of (*S*)-3b

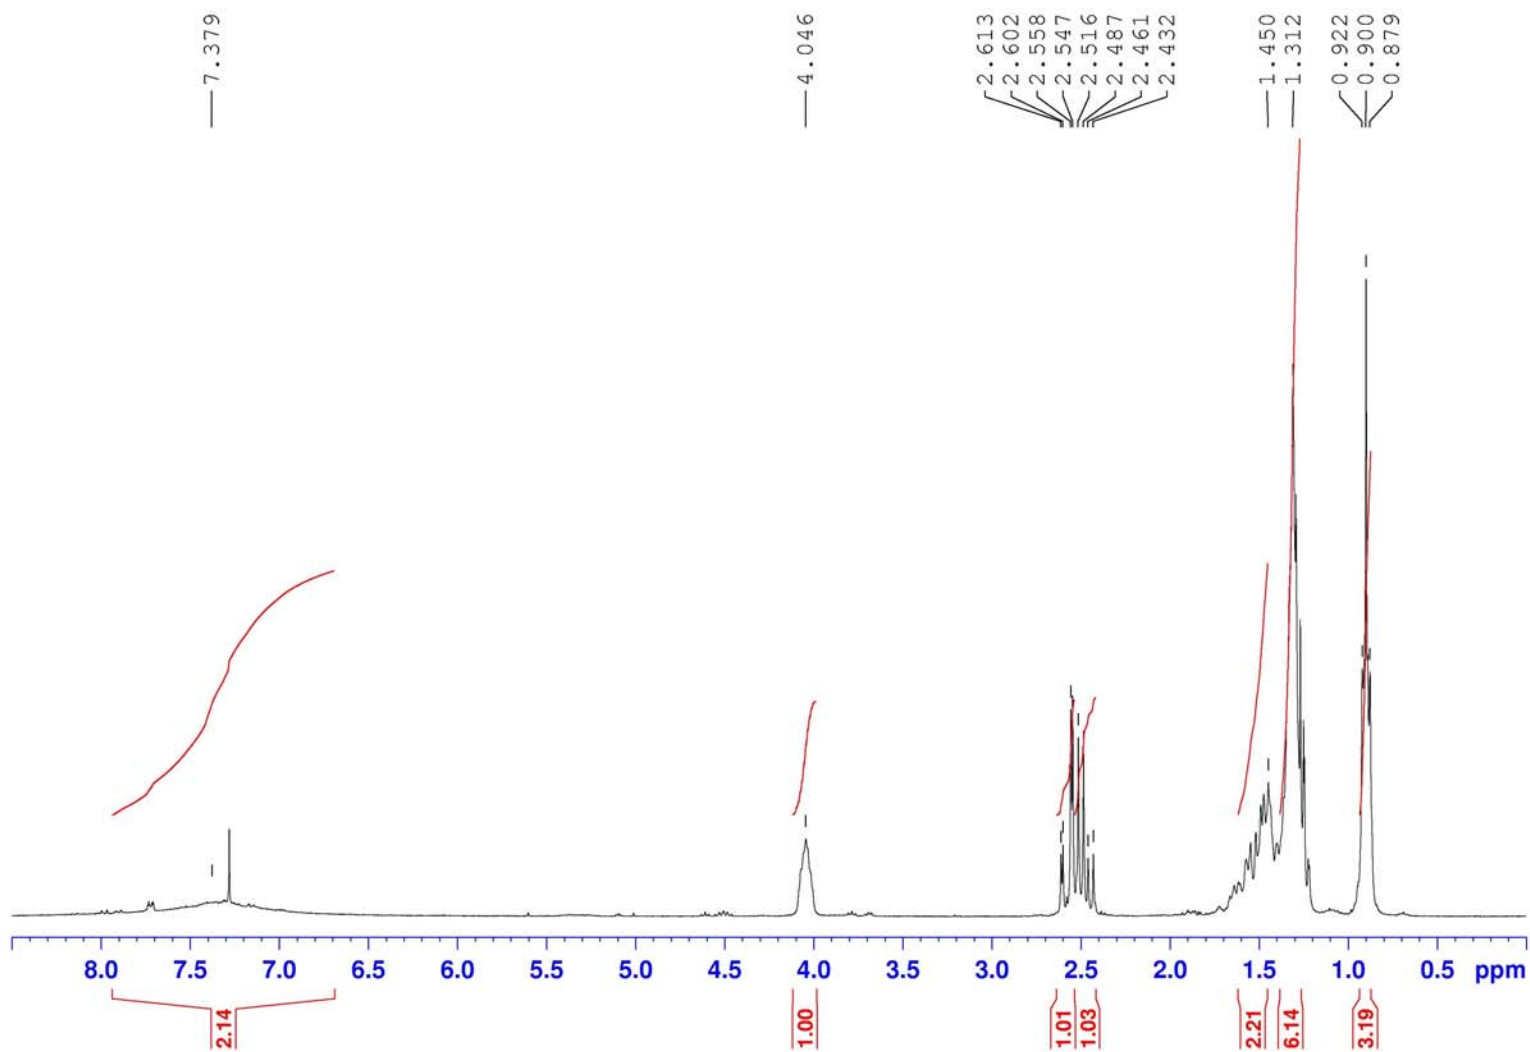

**$^{13}\text{C}$  NMR of (*S*)-3b**

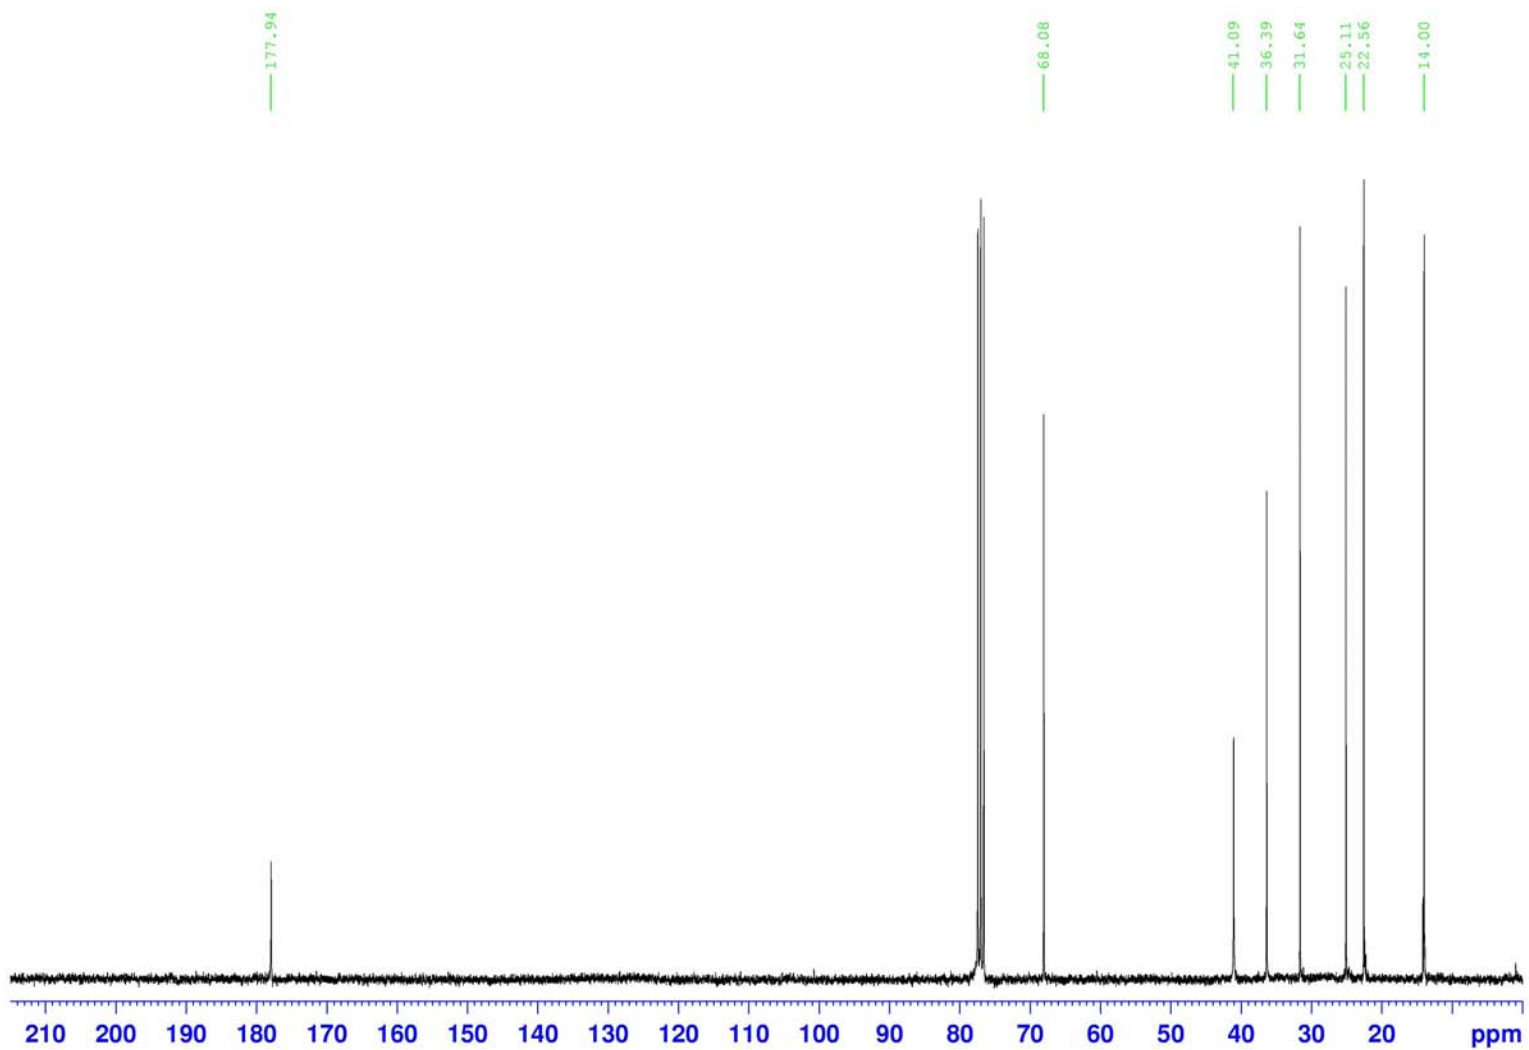

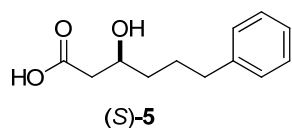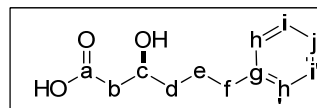

Catalytic asymmetric hydroboration of (*E*)-4 affords, after flash chromatography on silica gel (60:40 hexanes:ethyl acetate), the title compound (76%) as a colorless oil.

|                                                                            |                                                                                                                                                                                                                                                                                                                                 |
|----------------------------------------------------------------------------|---------------------------------------------------------------------------------------------------------------------------------------------------------------------------------------------------------------------------------------------------------------------------------------------------------------------------------|
| <b>TLC analysis</b>                                                        | $R_f$ 0.5 (30:70 hexanes:ethyl acetate)                                                                                                                                                                                                                                                                                         |
| <b>Optical rotation</b>                                                    | $[\alpha]_D^{20} = +13.8^\circ$ ( $c$ 0.5, $\text{CHCl}_3$ )                                                                                                                                                                                                                                                                    |
| <b><math>^1\text{H}</math> NMR (300 MHz, <math>\text{CDCl}_3</math>)</b>   | $\delta$ 7.35–7.25 (2H, m, i,i'), 7.25–7.15 (3H, m, h,h',j), 5.60 (2H, br s, COOH, OH), 4.10–4.00 (1H, m, c), 2.66 (2H, t, $J = 7.5$ Hz, f), 2.55 and 2.46 (2H, overlapping dd's, $J_1 = 16.6$ Hz, 2.9 Hz, $J_2 = 16.6$ Hz, 8.9 Hz, b), 1.90–1.75 (1H, m, d), 1.75–1.65 (1H, m, d), 1.65–1.60 (1H, m, e), 1.60–1.50 (1H, m, e). |
| <b><math>^{13}\text{C}</math> NMR (75 MHz, <math>\text{CDCl}_3</math>)</b> | $\delta$ 177.30 (a), 142.07 (g), 128.41 (h,h'), 128.35 (i,i'), 125.83 (j), 67.87 (c), 41.08 (b), 35.94 (d), 35.63 (f), 27.24 (e).                                                                                                                                                                                               |
| <b>IR (neat)</b>                                                           | 3230 (OH stretch), 2932 ( $\text{CH sp}^3$ stretch), 2547, 1689 (C=O stretch), 1447, 1407, 1311, 1291, 1194 (C-O stretch), 1075, 938, 877, 736, 699 $\text{cm}^{-1}$ .                                                                                                                                                          |

### $^1\text{H}$ NMR of (S)-5

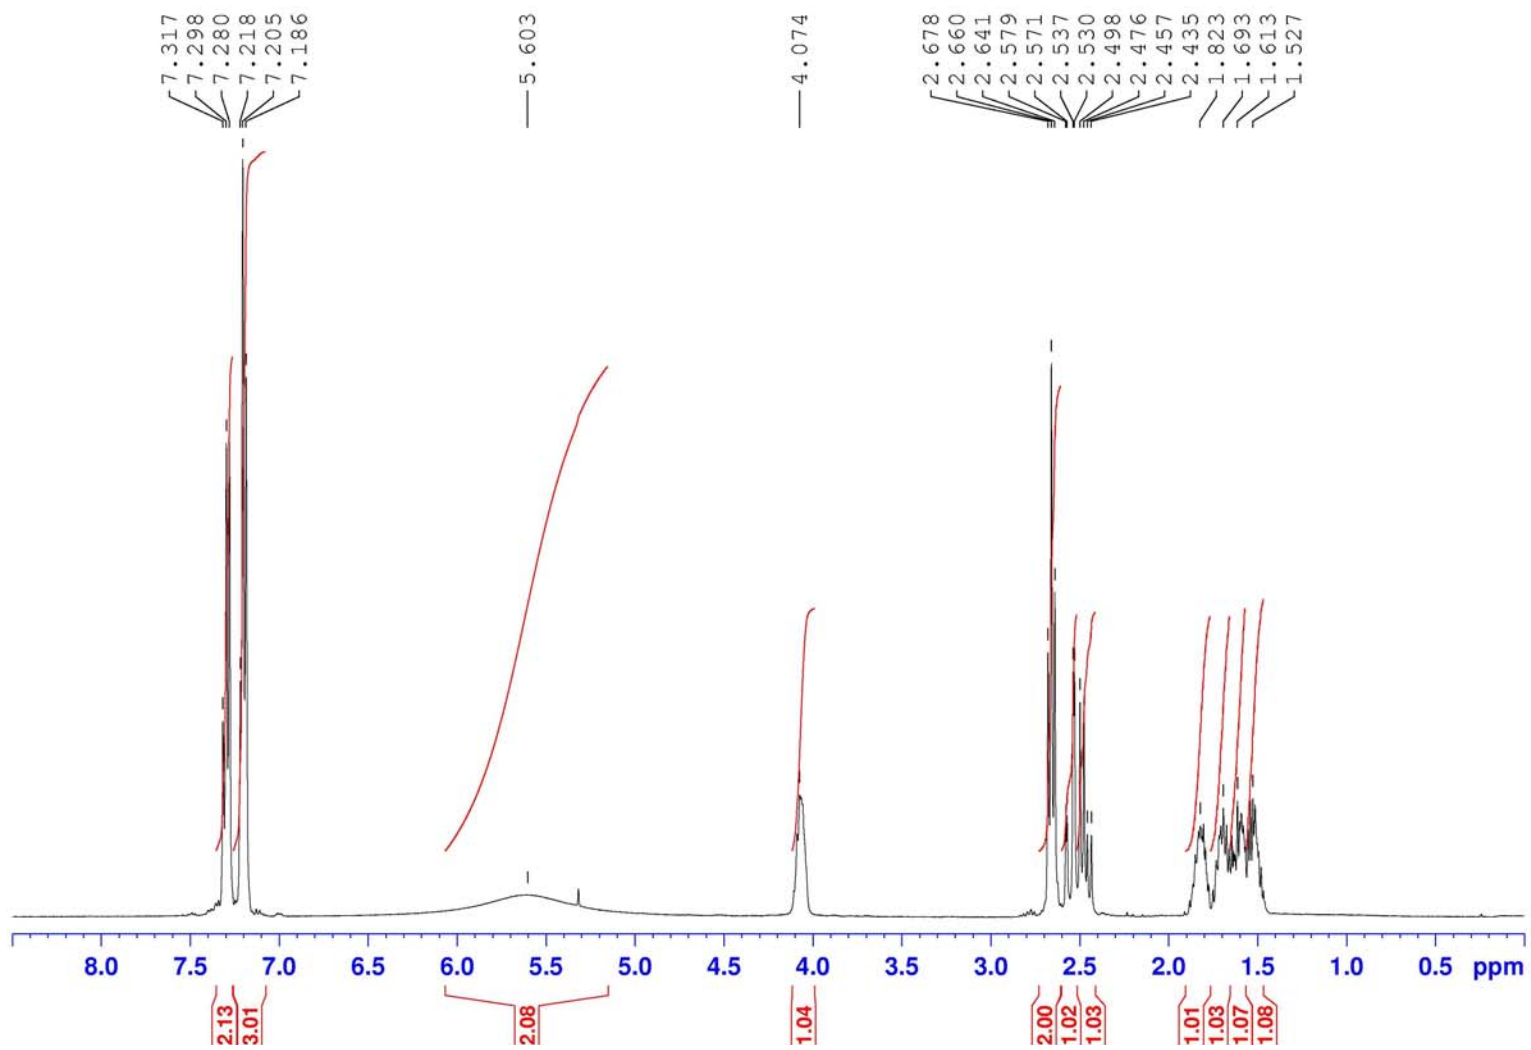

$^{13}\text{C}$  NMR of (*S*)-5

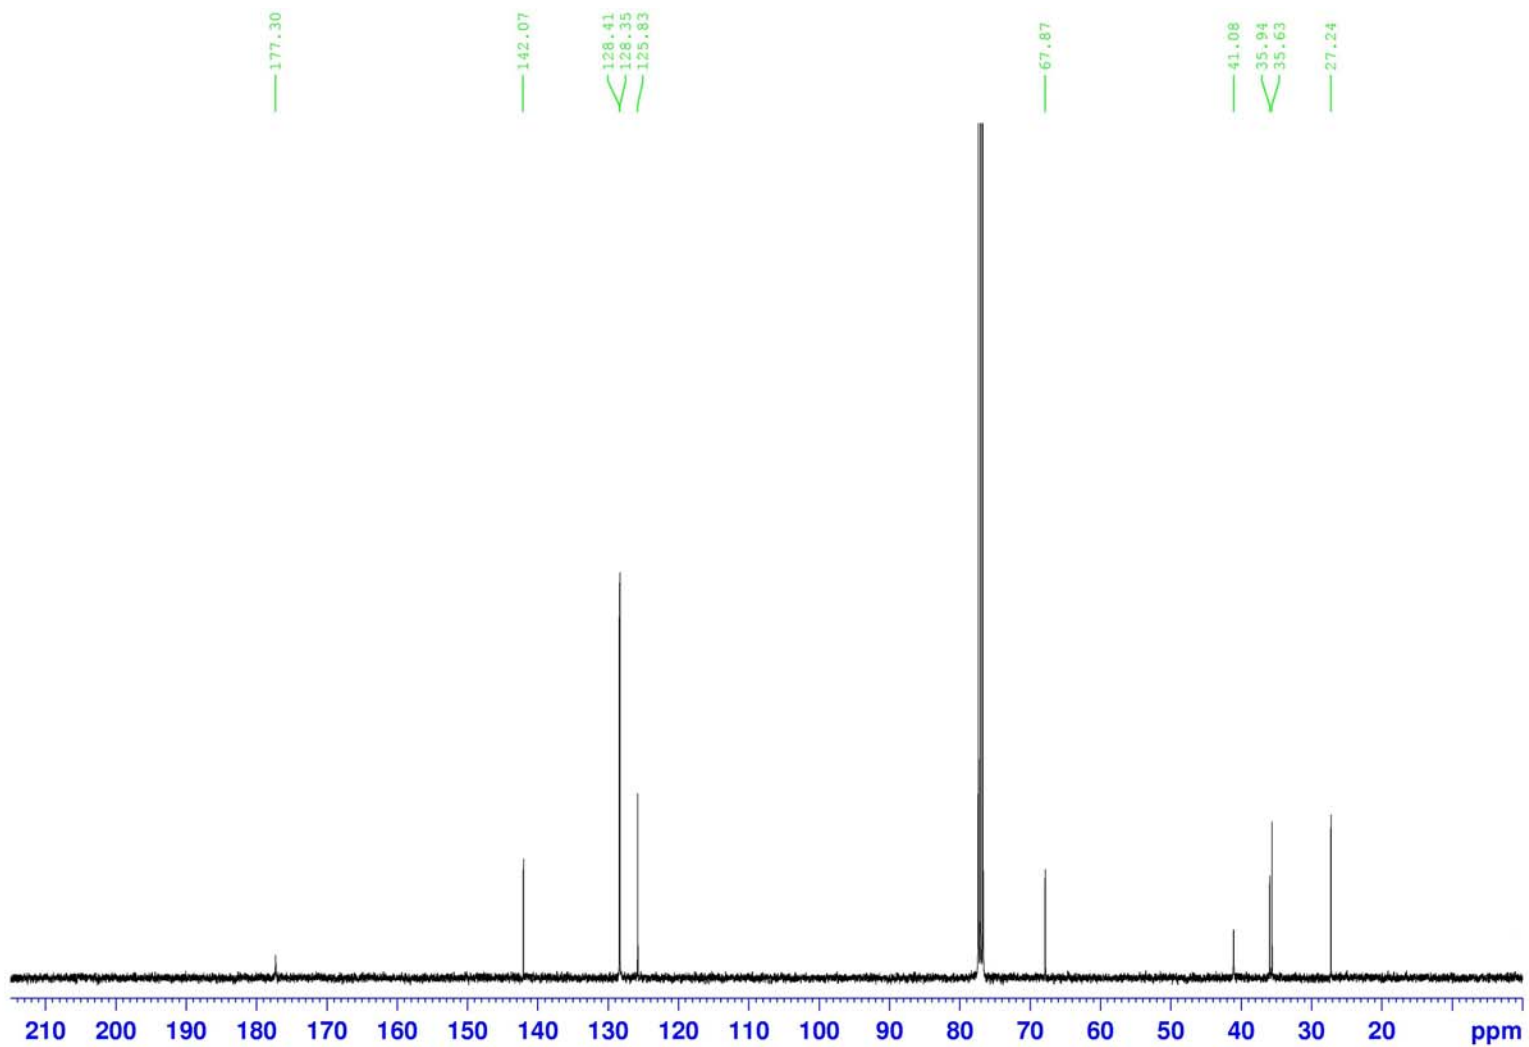

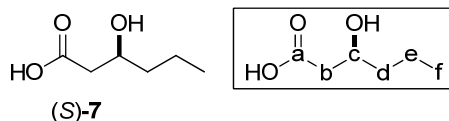

Catalytic asymmetric hydroboration of (*E*)-6 affords, after flash chromatography on silica gel (60:40 hexanes:ethyl acetate), the title compound (73%) as a colorless oil.

|                                                                             |                                                                                                                                                                                                                                                      |
|-----------------------------------------------------------------------------|------------------------------------------------------------------------------------------------------------------------------------------------------------------------------------------------------------------------------------------------------|
| <b>TLC analysis</b>                                                         | $R_f$ 0.3 (30:70 hexanes:ethyl acetate)                                                                                                                                                                                                              |
| <b>Optical rotation</b>                                                     | $[\alpha]_D^{20} = +13.0^\circ$ ( $c$ 0.5, $\text{CHCl}_3$ )                                                                                                                                                                                         |
| <b><math>^1\text{H}</math> NMR (400 MHz, <math>\text{CDCl}_3</math>)</b>    | $\delta$ 5.75 (2H, br s, COOH, OH), 4.10–4.00 (1H, m, c), 2.57 and 2.47 (2H, overlapping dd's, $J_1 = 16.5$ Hz, 3.0 Hz, $J_2 = 16.5$ Hz, 8.9 Hz), 1.60–1.50 (1H, m, d), 1.50–1.40 (2H, m, d,e), 1.40–1.35 (1H, m, e), 0.95 (3H, t, $J = 7.0$ Hz, f). |
| <b><math>^{13}\text{C}</math> NMR (100 MHz, <math>\text{CDCl}_3</math>)</b> | $\delta$ 177.38 (a), 67.79 (c), 41.06 (b), 38.55 (d), 18.65 (e), 13.89 (f).                                                                                                                                                                          |
| <b>IR (neat)</b>                                                            | 3522 (OH stretch), 2959 ( $\text{CH sp}^3$ stretch), 2932, 2874, 1708 ( $\text{C=O}$ stretch), 1467, 1380, 1177 (C-O stretch), 1122, 1075, 1019, 952, 883, 827 $\text{cm}^{-1}$ .                                                                    |

**$^1\text{H}$  NMR of (S)-7**

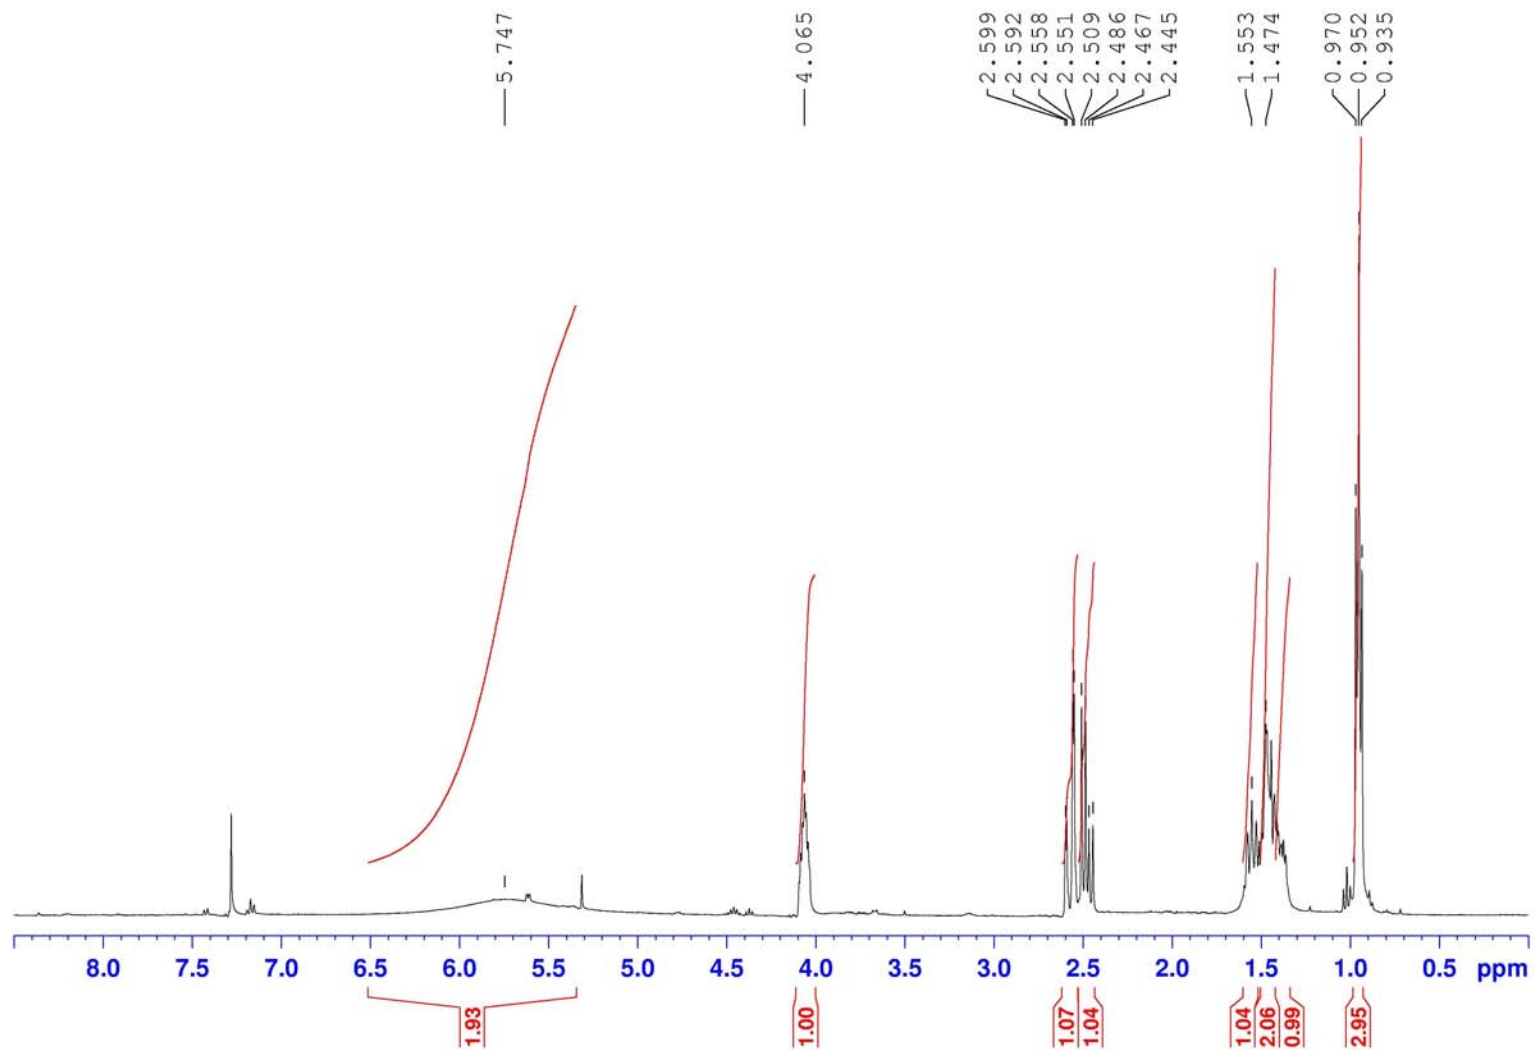



$^{13}\text{C}$  NMR of (*S*)-7

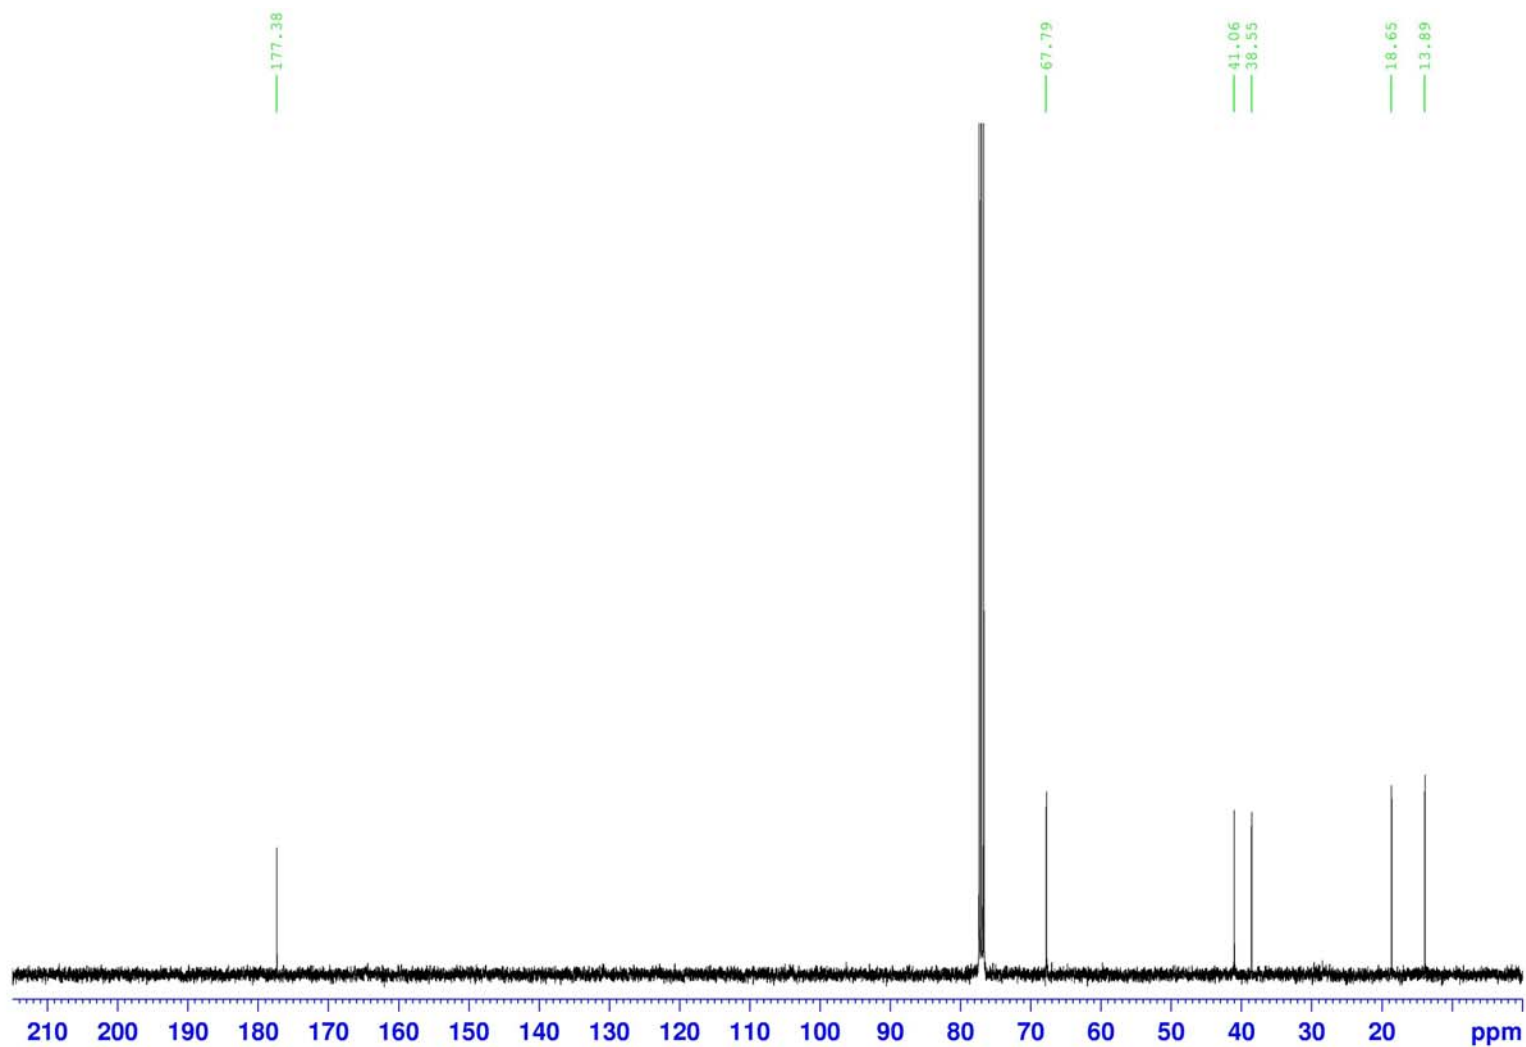

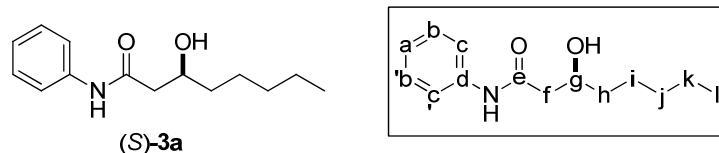

Catalytic asymmetric hydroboration of (*E*)-**1a** affords, after flash chromatography on silica gel (75:25 hexanes:ethyl acetate), the title compound (78%) as a colorless oil.

|                                                                             |                                                                                                                                                                                                                                                                                                                                     |
|-----------------------------------------------------------------------------|-------------------------------------------------------------------------------------------------------------------------------------------------------------------------------------------------------------------------------------------------------------------------------------------------------------------------------------|
| <b>TLC analysis</b>                                                         | $R_f$ 0.60 (50:50 hexanes:ethyl acetate)                                                                                                                                                                                                                                                                                            |
| <b>m.p.</b>                                                                 | 113–114 °C                                                                                                                                                                                                                                                                                                                          |
| <b>Optical rotation</b>                                                     | $[\alpha]_D^{20} = +7.0^\circ$ ( $c$ 0.5, ethanol)                                                                                                                                                                                                                                                                                  |
| <b>HPLC analysis</b>                                                        | HPLC analysis (Chiralpak-AD, 85:15 hexanes:isopropanol) showed peaks at 23.5 minutes (3.5% (R)) and 26.5 minutes (96.5% (S)).                                                                                                                                                                                                       |
| <b><math>^1\text{H}</math> NMR (400 MHz, <math>\text{CDCl}_3</math>)</b>    | $\delta$ 8.00 (1H, br s, NH), 7.52 (2H, d, $J = 8.0$ Hz, c, c'), 7.33 (2H, t, $J = 7.7$ Hz, b, b'), 7.13 (1H, t, $J = 7.3$ Hz, a), 4.20–4.00 (1H, m, g), 3.14 (1H, br s, OH), 2.57 and 2.47 (2H, overlapping dd's, $J_1 = 15.4$ Hz, 2.5 Hz, $J_2 = 15.4$ Hz, 8.8 Hz, f), 1.70–1.20 (8H, m, h,i,j,k), 0.92 (3H, t, $J = 6.6$ Hz, l). |
| <b><math>^{13}\text{C}</math> NMR (100 MHz, <math>\text{CDCl}_3</math>)</b> | $\delta$ 170.50 (e), 137.65 (d), 129.00 (c,c'), 124.41 (a), 120.04 (b,b'), 68.85 (g), 43.85 (f), 36.98 (h), 31.68 (i), 25.15 (j), 22.56 (k), 13.96 (l).                                                                                                                                                                             |
| <b>IR (neat)</b>                                                            | 3304 (N-H stretch), 2951, 2928, 2868, 1661 (C=O stretch), 1598, 1537 (N-H bend), 1498, 1442, 1308 (C-N stretch), 1253, 1123 (C-OH stretch), 1071, 756, 690 $\text{cm}^{-1}$ .                                                                                                                                                       |
| <b>HRMS (FAB)</b>                                                           | Calcd. for $\text{C}_{14}\text{H}_{22}\text{NO}_2$ (M+H): 236.1651, found 236.1661 $m/z$ .                                                                                                                                                                                                                                          |

### $^1\text{H}$ NMR of (*S*)-3a

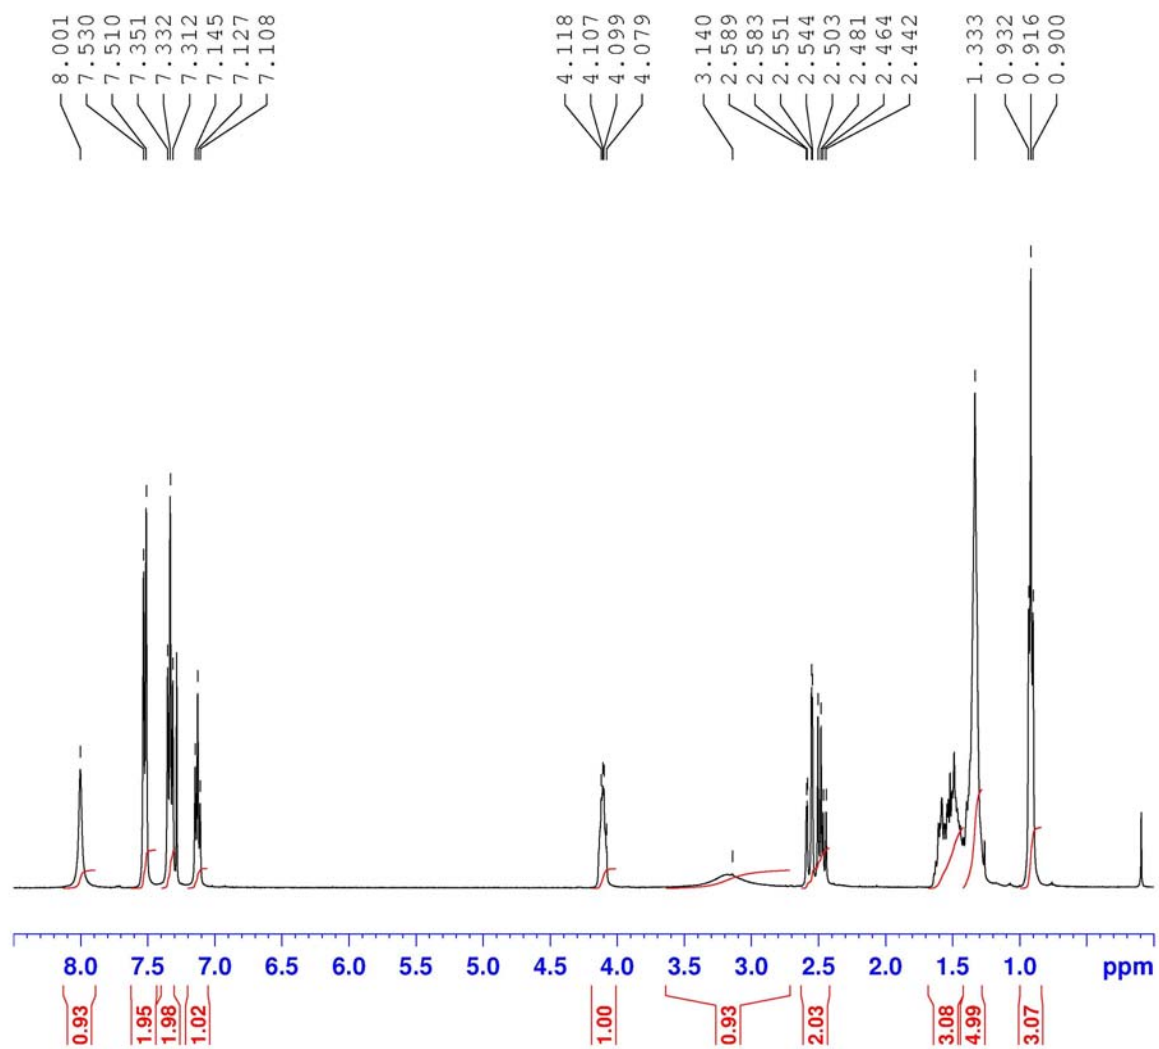

**$^{13}\text{C}$  NMR of (S)-3a**

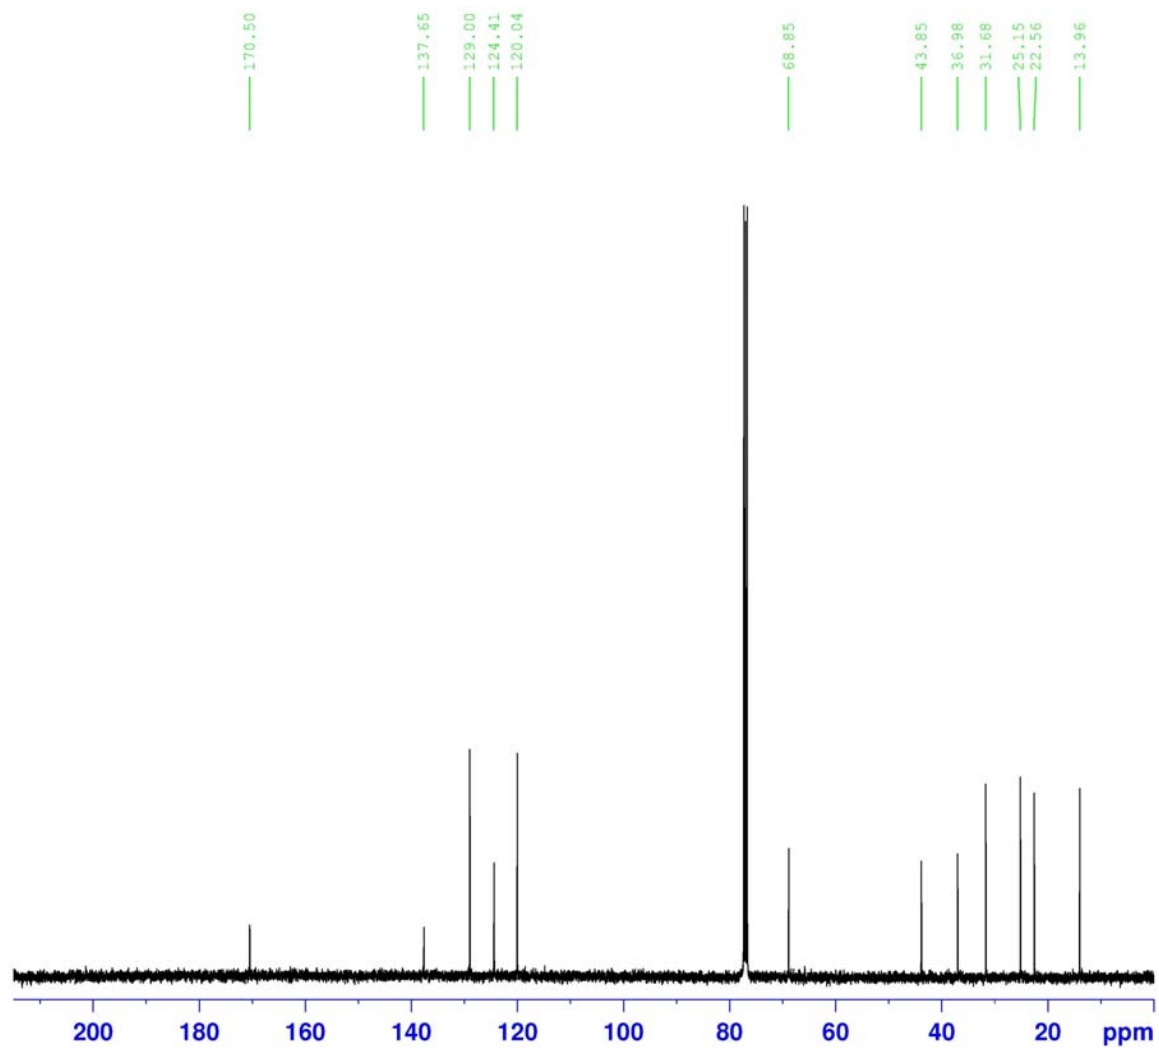

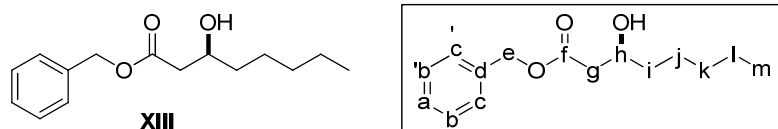

Benzylation of  $\beta$ -hydroxyacid (*S*)-**3b** affords, after flash chromatography on silica gel (90:10 hexanes:ethyl acetate), the title compound (82%) as a light yellow oil.

|                                                                            |                                                                                                                                                                                                                                                                                  |
|----------------------------------------------------------------------------|----------------------------------------------------------------------------------------------------------------------------------------------------------------------------------------------------------------------------------------------------------------------------------|
| <b>TLC analysis</b>                                                        | $R_f$ 0.6 (80:20 hexanes:ethyl acetate)                                                                                                                                                                                                                                          |
| <b>Optical rotation</b>                                                    | $[\alpha]_D^{20} = +14.2^\circ$ ( $c$ 0.5, $\text{CHCl}_3$ )                                                                                                                                                                                                                     |
| <b>HPLC analysis</b>                                                       | HPLC analysis (Chiralcel-OD, 80:20 hexanes: isopropanol) showed peaks at 11 minutes (1.5% (R)) and 14 minutes (98.5% (S)).                                                                                                                                                       |
| <b><math>^1\text{H}</math> NMR (300 MHz, <math>\text{CDCl}_3</math>)</b>   | $\delta$ 7.45–7.30 (5H, m, a,b,b',c,c'), 5.18 (2H, s, e), 4.10–4.00 (1H, m, h), 2.94 (1H, br s, OH), 2.58 and 2.48 (2H, overlapping dd's, $J_1 = 16.4$ Hz, 3.4 Hz, $J_2 = 16.4$ Hz, 8.8 Hz, g), 1.60–1.40 (3H, m, i,j), 1.40–1.20 (5H, m, j,k,l), 0.91 (3H, t, $J = 6.6$ Hz, m). |
| <b><math>^{13}\text{C}</math> NMR (75 MHz, <math>\text{CDCl}_3</math>)</b> | $\delta$ 172.87 (f), 135.63 (d), 128.63 (c,c'), 128.38 (a), 128.27 (b,b'), 68.05 (h), 66.47 (e), 41.39 (g), 36.51 (i), 31.71 (j), 25.15 (k), 22.58 (l), 14.02 (m).                                                                                                               |
| <b>IR (neat)</b>                                                           | 3441 (OH stretch), 2954 ( $\text{CH sp}^3$ stretch), 2930, 2859, 1728 (C=O stretch), 1456, 1278, 1160 (C-O stretch), 969, 736, 695 $\text{cm}^{-1}$ .                                                                                                                            |

### $^1\text{H}$ NMR of XIII

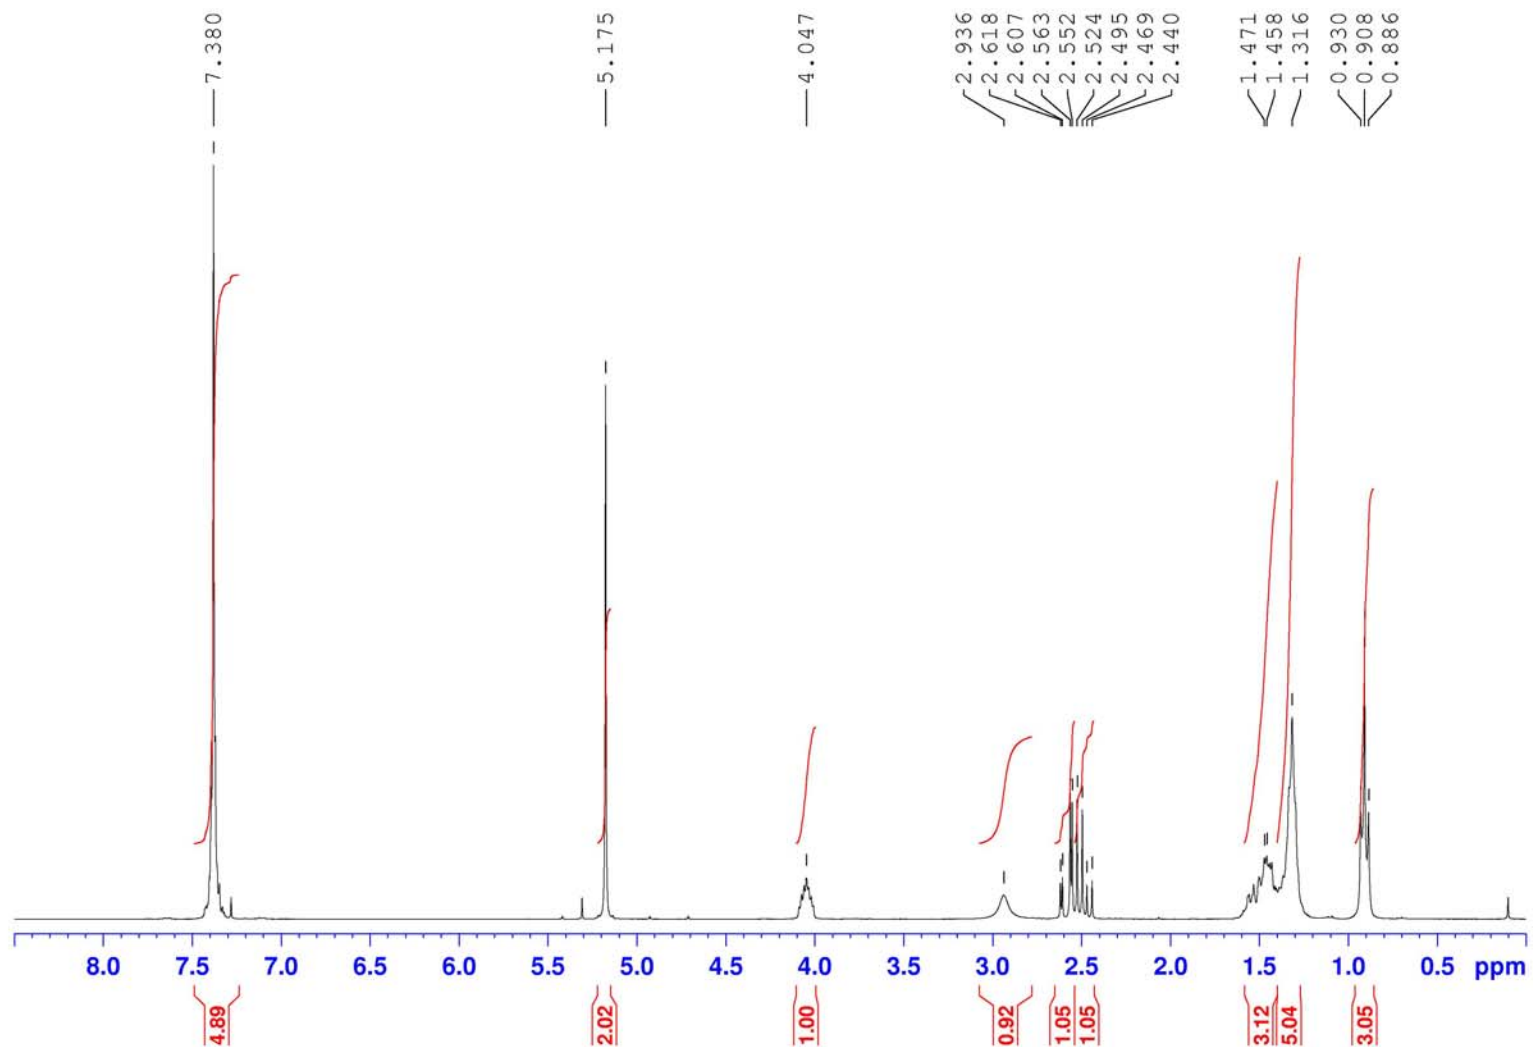

### $^{13}\text{C}$ NMR of XIII

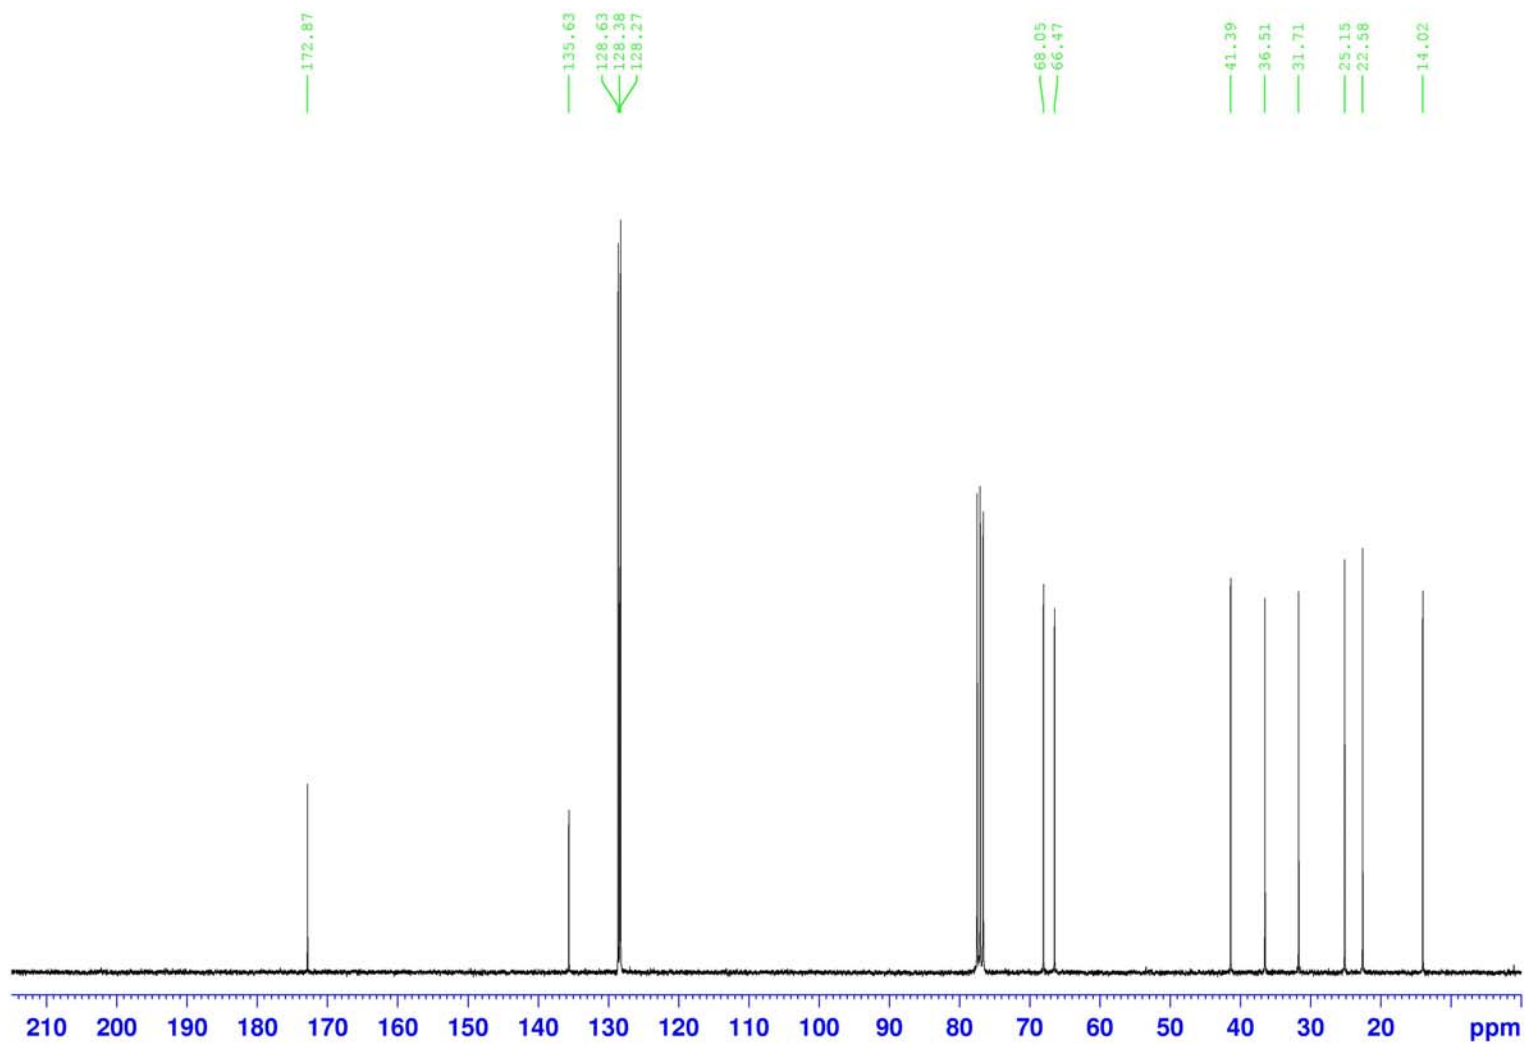

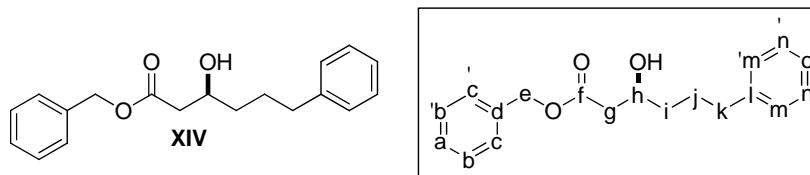

Benzylation of  $\beta$ -hydroxyacid (*S*)-**5** affords, after flash chromatography on silica gel (90:10 hexanes:ethyl acetate), the title compound (84%) as a light yellow oil.

|                                                                            |                                                                                                                                                                                                                                                                                                                                                      |
|----------------------------------------------------------------------------|------------------------------------------------------------------------------------------------------------------------------------------------------------------------------------------------------------------------------------------------------------------------------------------------------------------------------------------------------|
| <b>TLC analysis</b>                                                        | $R_f$ 0.5 (80:20 hexanes:ethyl acetate)                                                                                                                                                                                                                                                                                                              |
| <b>Optical rotation</b>                                                    | $[\alpha]_D^{20} = +15.9^\circ$ ( $c$ 0.5, $\text{CHCl}_3$ )                                                                                                                                                                                                                                                                                         |
| <b>HPLC analysis</b>                                                       | HPLC analysis (Chiralcel-OD, 80:20 hexanes: isopropanol) showed peaks at 22 minutes (2.0% (R)) and 31 minutes (98.0% (S)).                                                                                                                                                                                                                           |
| <b><math>^1\text{H}</math> NMR (300 MHz, <math>\text{CDCl}_3</math>)</b>   | $\delta$ 7.45–7.35 (5H, m, a,b,b',c,c'), 7.35–7.25 (2H, m, n,n'), 7.25–7.15 (3H, m, m,m',o), 5.18 (2H, s, e), 4.15–4.00 (1H, m, h), 2.97 (1H, br s, OH), 2.67 (2H, t, $J = 7.4$ Hz, k), 2.58 and 2.49 (2H, overlapping dd's, $J_1 = 16.5$ Hz, 3.6 Hz, $J_2 = 16.5$ Hz, 8.6 Hz, g), 1.90–1.80 (1H, m, i), 1.75–1.60 (1H, m, i), 1.60–1.40 (2H, m, j). |
| <b><math>^{13}\text{C}</math> NMR (75 MHz, <math>\text{CDCl}_3</math>)</b> | $\delta$ 172.82 (f), 142.17 (l), 135.60 (d), 128.66 (c,c'), 128.42 (m,m',a), 128.34 (n,n'), 128.30 (b,b'), 125.81 (o), 67.89 (h), 66.53 (e), 41.39 (g), 36.02 (i), 35.69 (k), 27.27 (j).                                                                                                                                                             |
| <b>IR (neat)</b>                                                           | 3434 (OH stretch), 2938 ( $\text{CH sp}^3$ stretch), 2859, 1728 ( $\text{C=O}$ stretch), 1496, 1454, 1168 ( $\text{C-O}$ stretch), 1087, 967, 748, 696 $\text{cm}^{-1}$ .                                                                                                                                                                            |
| <b>HRMS (CI)</b>                                                           | Calcd. for $\text{C}_{19}\text{H}_{22}\text{NaO}_3$ ( $\text{M}+\text{Na}$ ): 321.1467, found 321.1472 $m/z$ .                                                                                                                                                                                                                                       |



### $^1\text{H}$ NMR of XIV

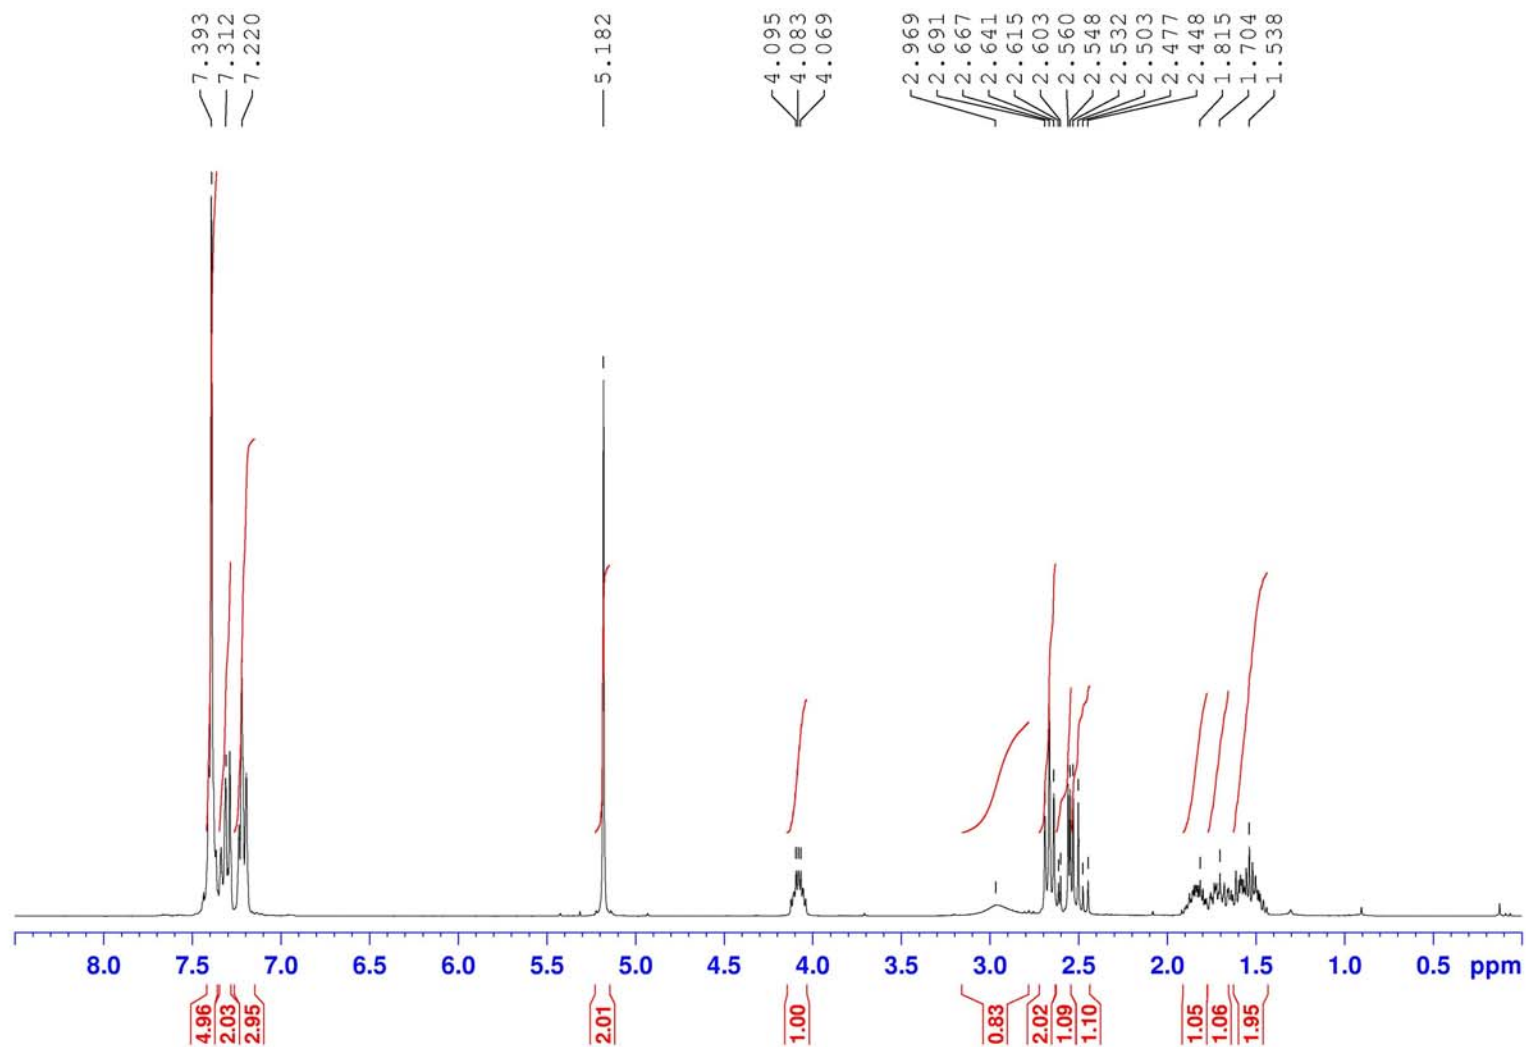

### $^{13}\text{C}$ NMR of XIV

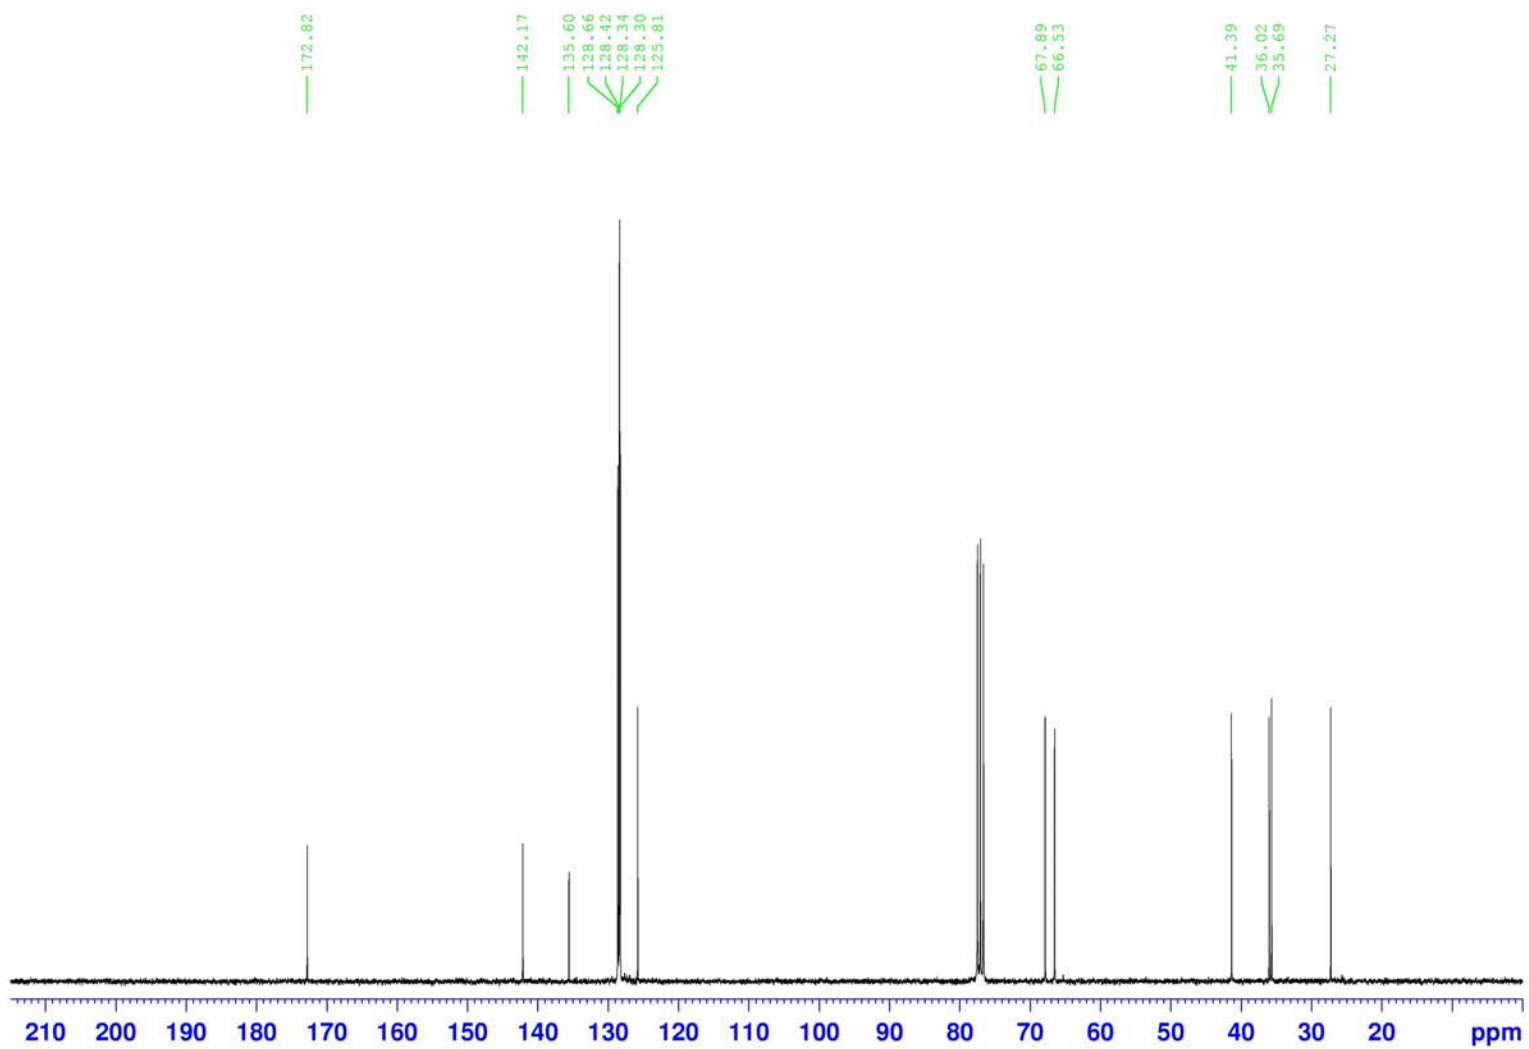

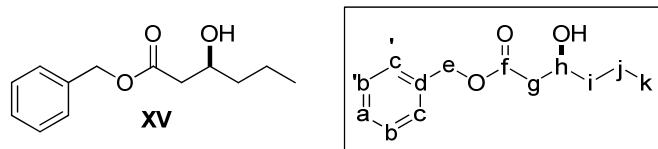

Benzylation of  $\beta$ -hydroxyacid (*S*)-**7** affords, after flash chromatography on silica gel (90:10 hexanes:ethyl acetate), the title compound (78%) as a light yellow oil.

|                                                                            |                                                                                                                                                                                                                                                        |
|----------------------------------------------------------------------------|--------------------------------------------------------------------------------------------------------------------------------------------------------------------------------------------------------------------------------------------------------|
| <b>TLC analysis</b>                                                        | $R_f$ 0.5 (80:20 hexanes:ethyl acetate)                                                                                                                                                                                                                |
| <b>Optical rotation</b>                                                    | $[\alpha]_D^{20} = +13.8^\circ$ ( $c$ 0.5, $\text{CHCl}_3$ )                                                                                                                                                                                           |
| <b>HPLC analysis</b>                                                       | HPLC analysis (Chiralcel-OD, 80:20 hexanes: isopropanol) showed peaks at 9 minutes (1.5% (R)) and 12 minutes (98.5% (S)).                                                                                                                              |
| <b><math>^1\text{H}</math> NMR (300 MHz, <math>\text{CDCl}_3</math>)</b>   | $\delta$ 7.45–7.35 (5H, m, a,b,b',c,c'), 5.18 (2H, s, e), 4.10–4.00 (1H, m, h), 2.86 (1H, br s, OH), 2.58 and 2.48 (2H, overlapping dd's, $J_1 = 16.5$ Hz, 3.4 Hz, $J_2 = 16.5$ Hz, 8.8 Hz, g), 1.60–1.35 (4H, m, i,j), 0.95 (3H, t, $J = 7.0$ Hz, k). |
| <b><math>^{13}\text{C}</math> NMR (75 MHz, <math>\text{CDCl}_3</math>)</b> | $\delta$ 172.90 (f), 135.60 (d), 128.64 (c,c'), 128.40 (a), 128.28 (b,b'), 67.76 (h), 66.50 (e), 41.36 (g), 38.63 (i), 18.67 (j), 13.96 (k).                                                                                                           |
| <b>IR (neat)</b>                                                           | 3444 (OH stretch), 2958 ( $\text{CH sp}^3$ stretch), 2932, 2872, 1728 (C=O stretch), 1455, 1381, 1262, 1163 (C-O stretch), 980, 906, 736, 696 $\text{cm}^{-1}$ .                                                                                       |

### $^1\text{H}$ NMR of XV

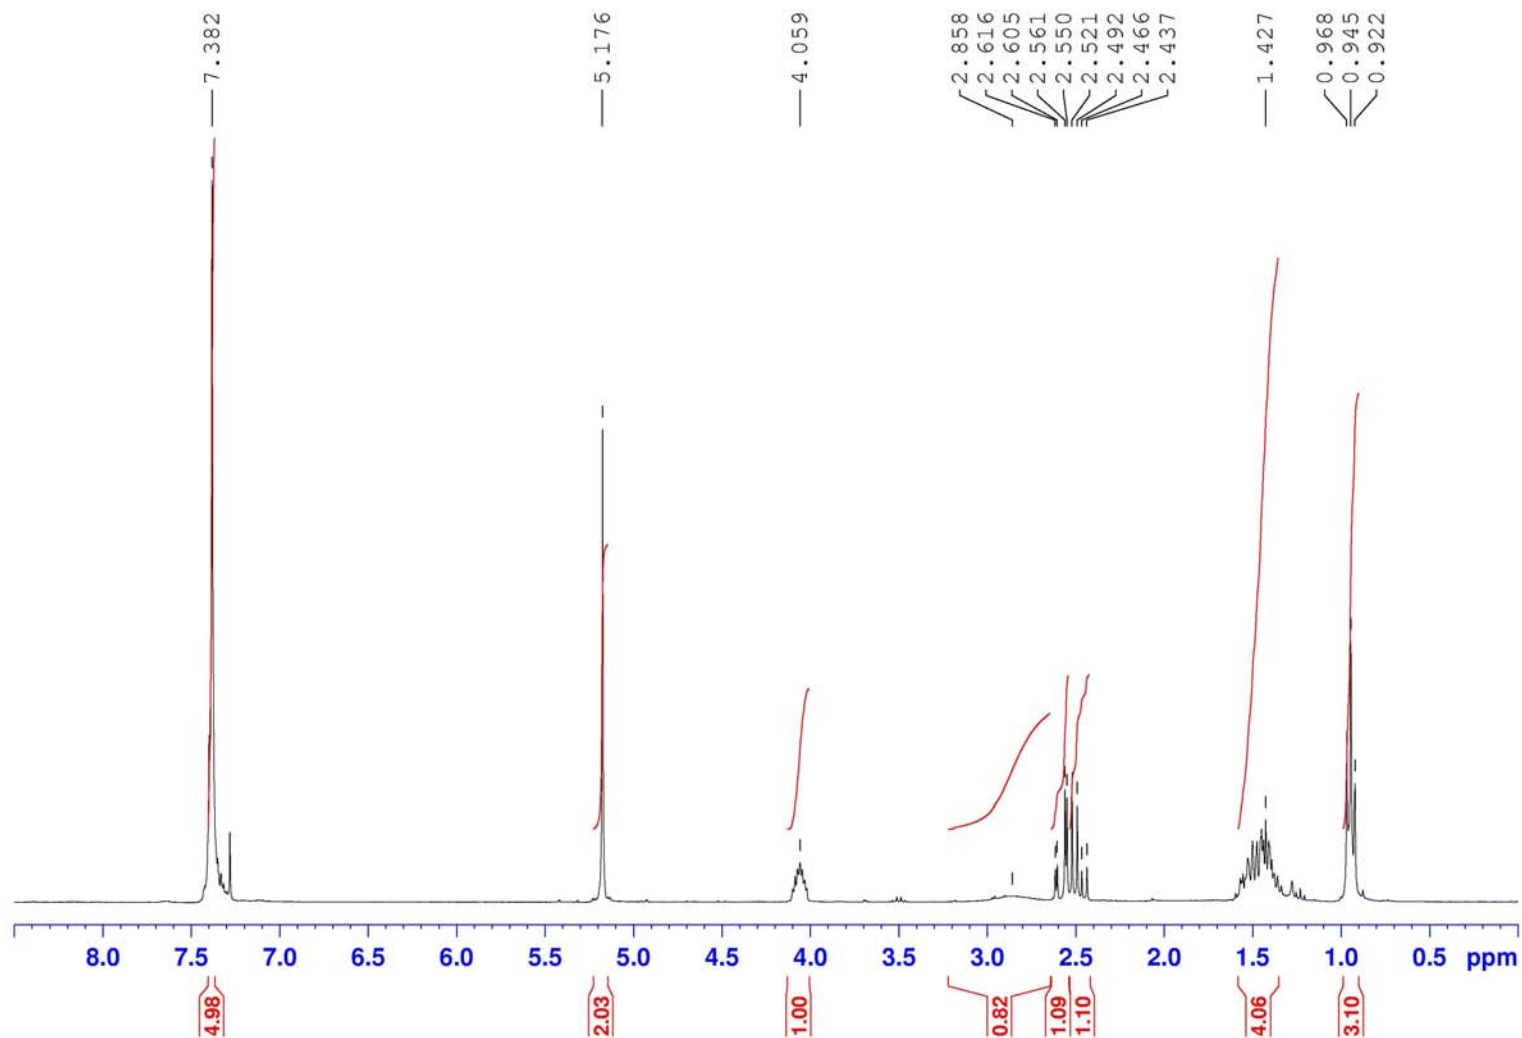

$^{13}\text{C}$  NMR of XV

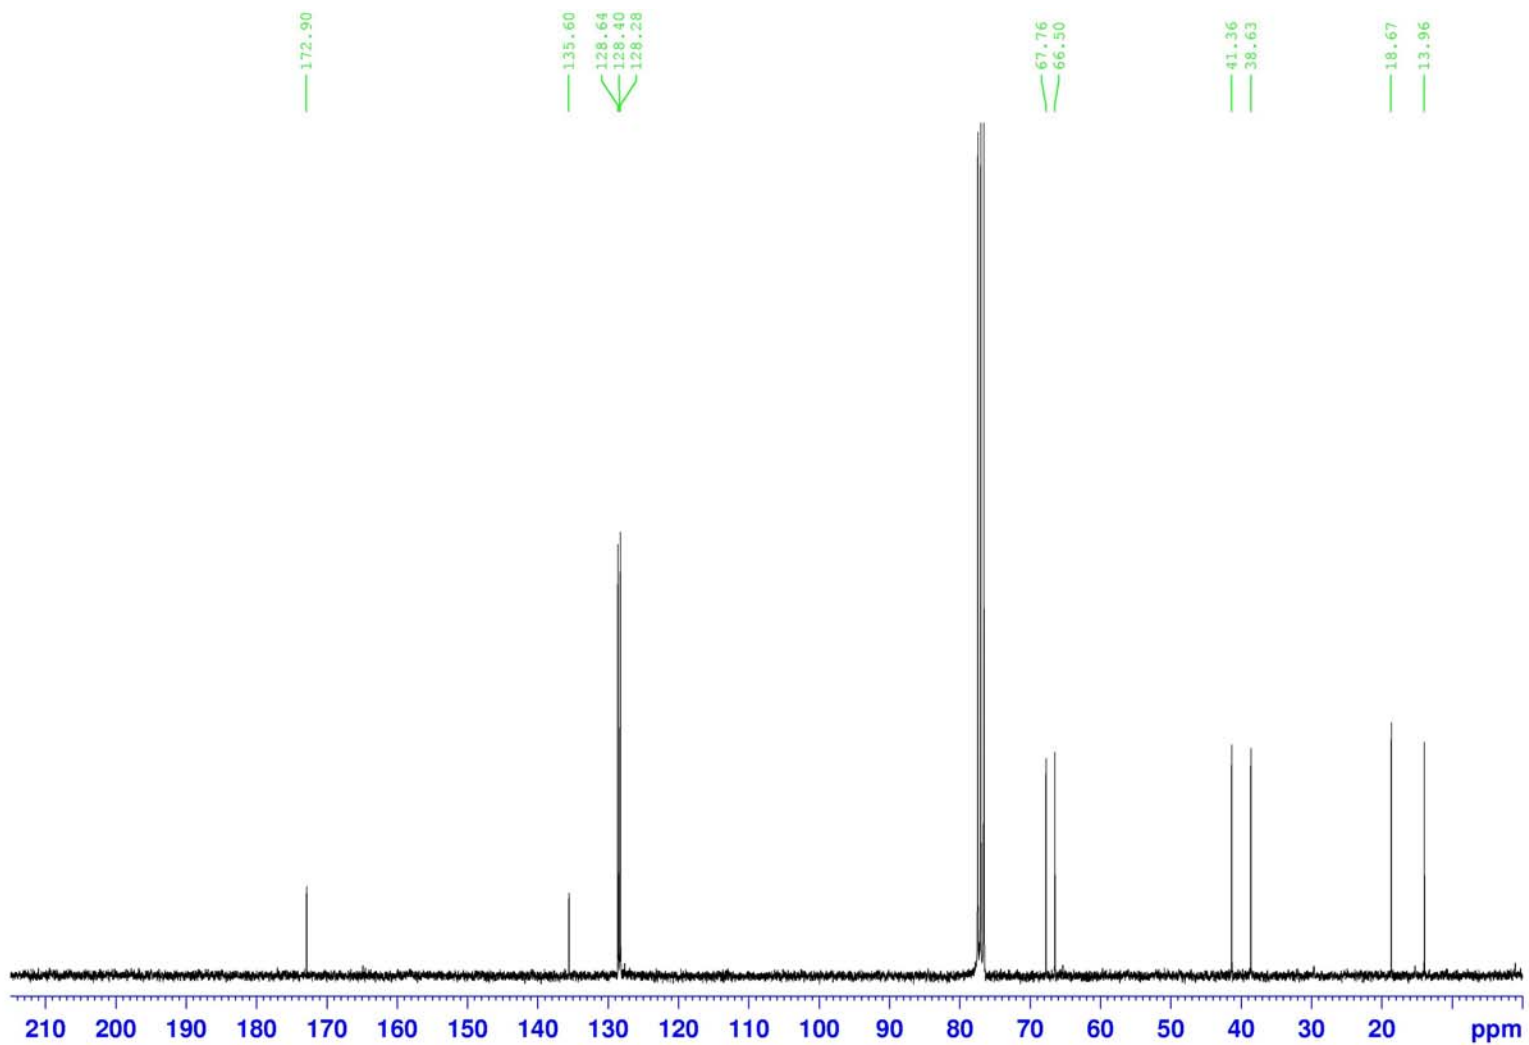

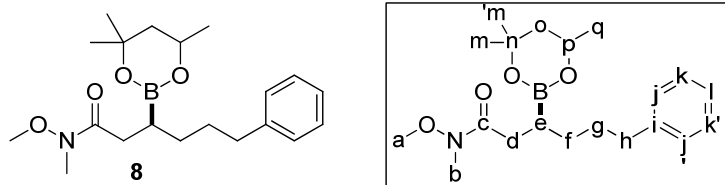

Catalytic asymmetric hydroboration of (*E*)-**4** without oxidative workup affords, after flash chromatography on silica gel (85:15 hexanes:ethyl acetate), the title compound (79%) as a light yellow oil.

|                                                                            |                                                                                                                                                                                                                                                                                                                                        |
|----------------------------------------------------------------------------|----------------------------------------------------------------------------------------------------------------------------------------------------------------------------------------------------------------------------------------------------------------------------------------------------------------------------------------|
| <b>TLC analysis</b>                                                        | $R_f$ 0.5 (60:40 hexanes:ethyl acetate)                                                                                                                                                                                                                                                                                                |
| <b>Optical rotation</b>                                                    | $[\alpha]_D^{20} = -8.0^\circ$ ( $c$ 0.5, $\text{CHCl}_3$ )                                                                                                                                                                                                                                                                            |
| <b><math>^1\text{H}</math> NMR (300 MHz, <math>\text{CDCl}_3</math>)</b>   | $\delta$ 7.35–7.25 (2H, m, k,k'), 7.25–7.15 (3H, m, j,j',l), 4.25–4.10 (1H, m, q), 3.68 (3H, s, a), 3.20 and 3.17 (3H, s's, b), 2.62 (2H, t, $J = 6.8$ Hz, h), 2.50–2.40 (2H, m, d), 1.72 (1H, dd, $J = 13.7$ Hz, 3.0 Hz, o), 1.70–1.60 (2H, m, f), 1.60–1.30 (4H, m, o,g,e), 1.29 (3H, s, m), 1.25 (3H, s, m'), 1.25–1.20 (3H, m, q). |
| <b><math>^{13}\text{C}</math> NMR (75 MHz, <math>\text{CDCl}_3</math>)</b> | $\delta$ 143.13 (i), 128.42 (j,j'), 128.16 (k,k'), 125.44 (l), 70.19 and 70.14 (n), 64.41 and 64.28 (p), 61.22 and 61.09 (a), 45.90 and 45.83 (o), 36.21 (h), 33.95 (d), 32.17 (b), 31.29 (m), 30.97 (g), 30.88 and 30.85 (f), 27.93 and 27.81 (m'), 27.73 (e), 23.22 (q).                                                             |
| <b>IR (neat)</b>                                                           | 2858 (CH $\text{sp}^3$ stretch), 2926, 2856, 1662 (C=O stretch), 1454, 1378, 1314, 1144 (C-O stretch), 1001, 967, 867, 670 $\text{cm}^{-1}$ .                                                                                                                                                                                          |
| <b>HRMS (CI)</b>                                                           | Calcd. for $\text{C}_{20}\text{H}_{33}\text{BNO}_4$ (M+H): 362.2503, found 362.2511 $m/z$ .                                                                                                                                                                                                                                            |

### $^1\text{H}$ NMR of 8

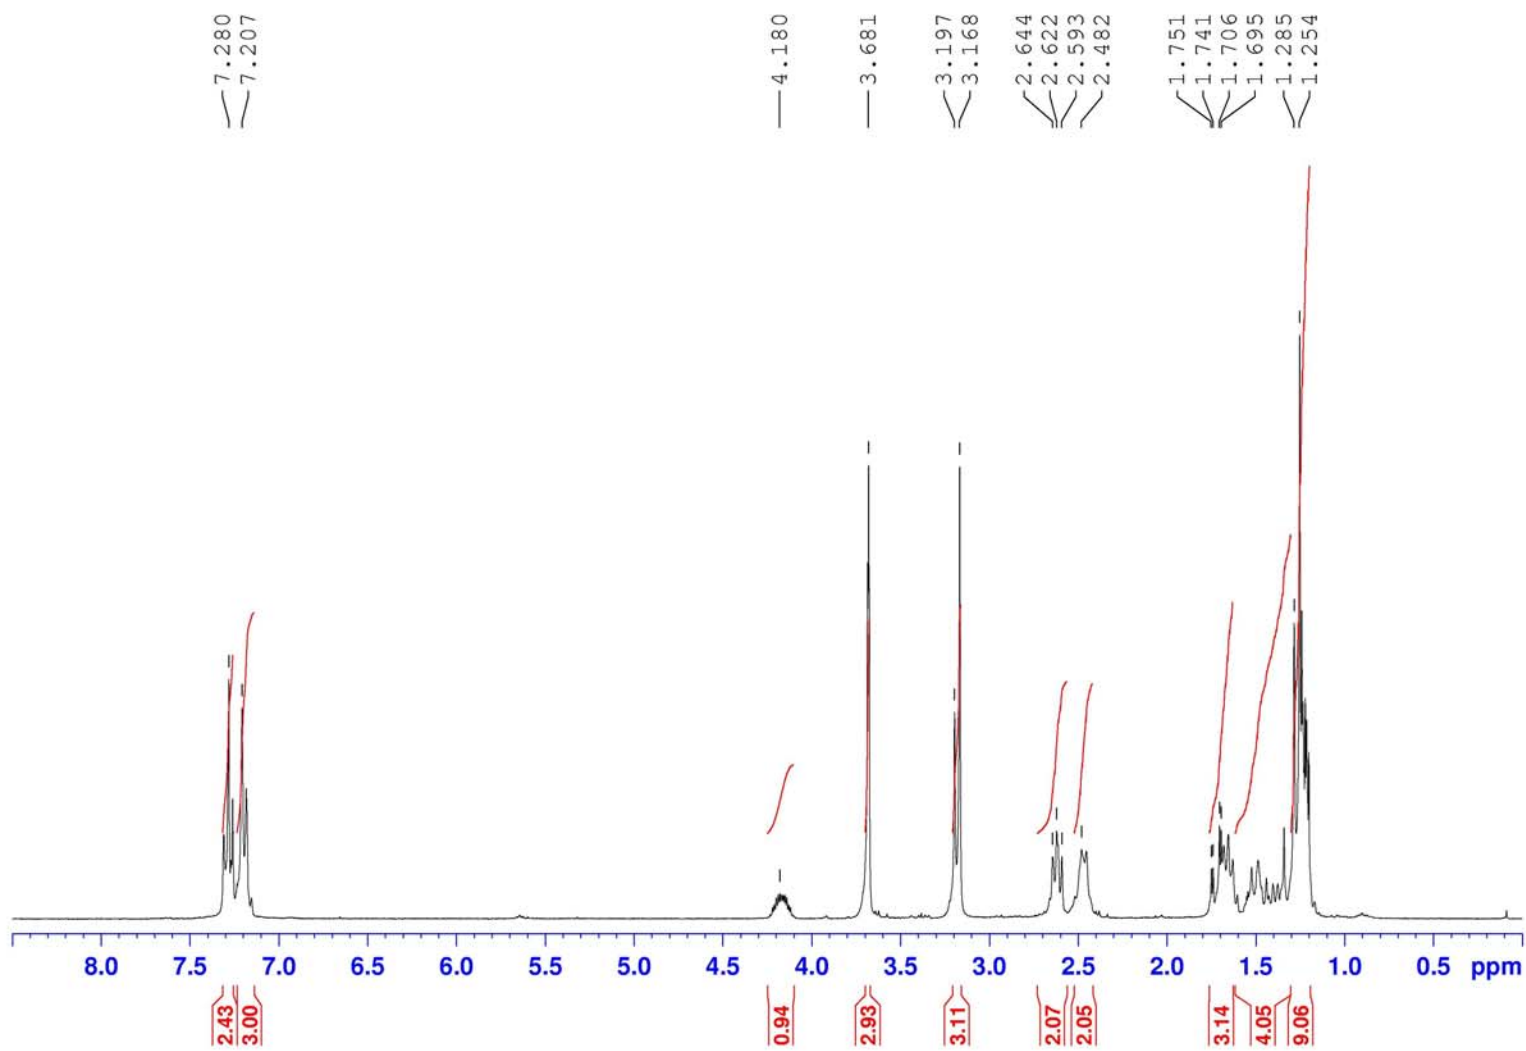

$^{13}\text{C}$  NMR of 8

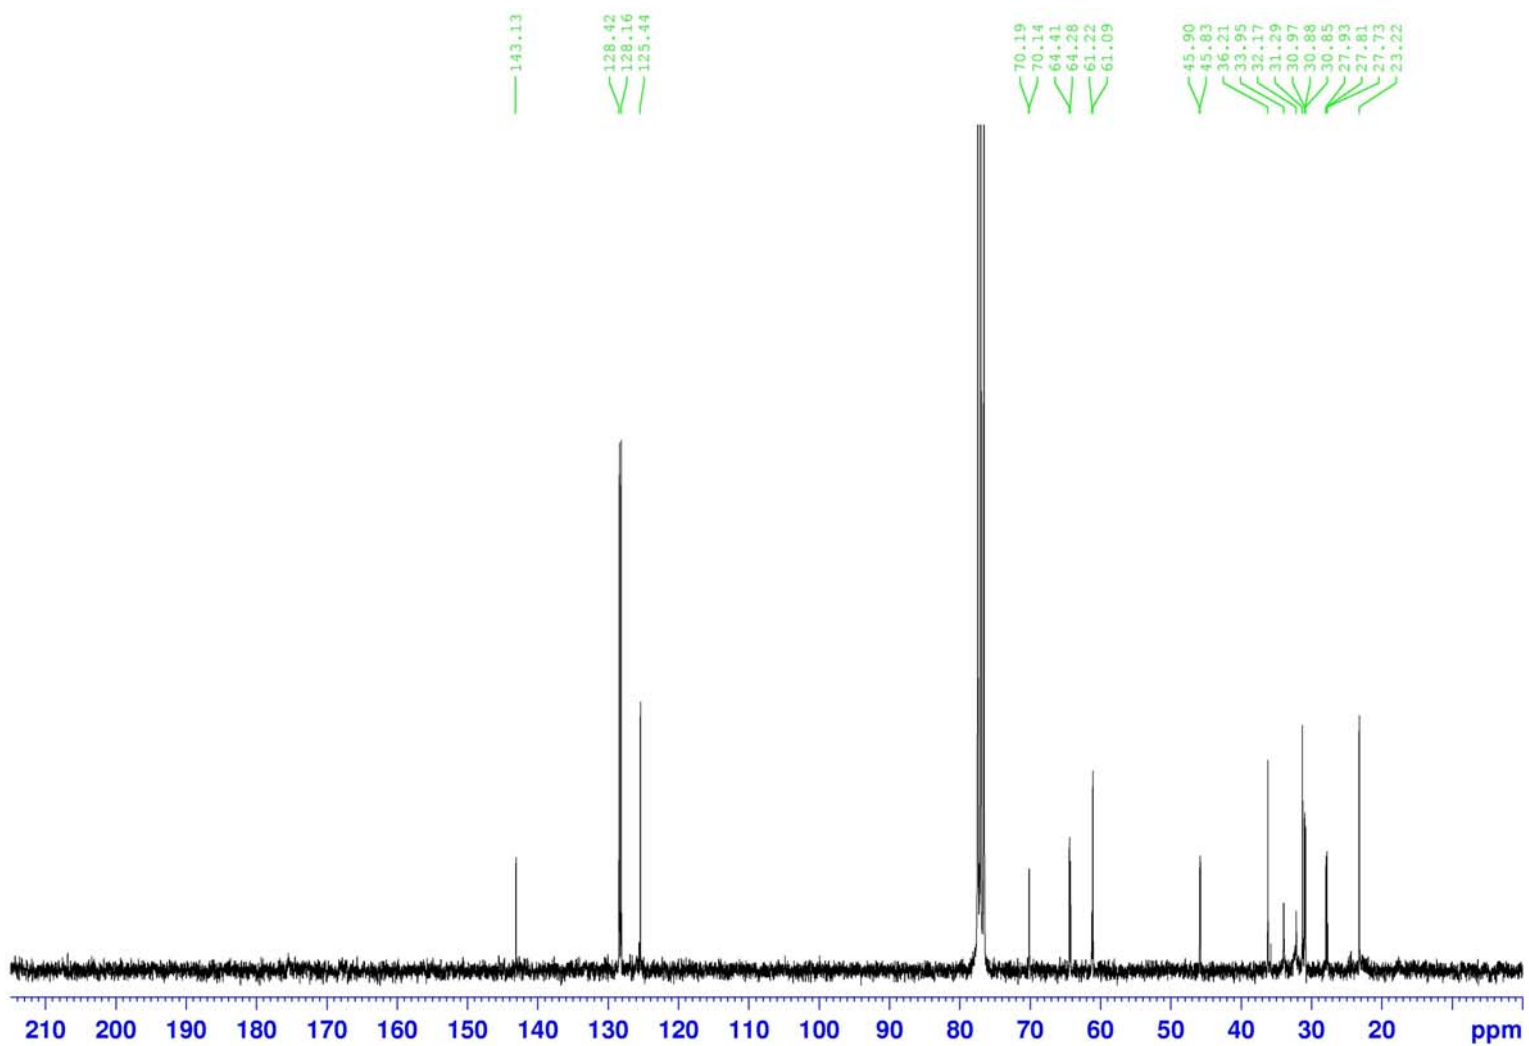



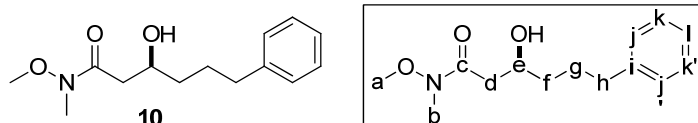

Catalytic asymmetric hydroboration of (*E*)-**4** with mild oxidative workup (NaBO<sub>3</sub>) affords, after flash chromatography on silica gel (60:40 hexanes:ethyl acetate), the title compound (97%) as a light yellow oil.

|                                                       |                                                                                                                                                                                                                                                                                                                                                      |
|-------------------------------------------------------|------------------------------------------------------------------------------------------------------------------------------------------------------------------------------------------------------------------------------------------------------------------------------------------------------------------------------------------------------|
| <b>TLC analysis</b>                                   | <i>R<sub>f</sub></i> 0.4 (25:75 hexanes:ethyl acetate)                                                                                                                                                                                                                                                                                               |
| <b>Optical rotation</b>                               | $[\alpha]_D^{20} = +21.5^\circ$ ( <i>c</i> 0.5, CHCl <sub>3</sub> )                                                                                                                                                                                                                                                                                  |
| <b><sup>1</sup>H NMR (400 MHz, CDCl<sub>3</sub>)</b>  | $\delta$ 7.35–7.25 (2H, m, k,k'), 7.25–7.15 (3H, m, j,j',l), 4.10–4.00 (1H, m, e), 3.89 (1H, br s, OH), 3.68 (3H, s, a), 3.68 (3H, s, b), 2.67 (2H, t, <i>J</i> = 7.5 Hz, h), 2.70–2.60 (1H, suspected dd, d), 2.46 (1H, dd, <i>J</i> = 16.8 Hz, 9.6 Hz, d), 1.90–1.80 (1H, m, f), 1.80–1.70 (1H, m, f), 1.70–1.60 (1H, m, g), 1.60–1.45 (1H, m, g). |
| <b><sup>13</sup>C NMR (100 MHz, CDCl<sub>3</sub>)</b> | $\delta$ 173.86 (c), 142.36 (i), 128.45 (j,j'), 128.29 (k,k'), 125.72 (l), 67.72 (e), 61.25 (a), 38.22 (d), 36.08 (f), 35.79 (h), 31.84 (b), 27.36 (g).                                                                                                                                                                                              |
| <b>IR (neat)</b>                                      | 3427 (OH stretch), 2962 (CH sp <sup>3</sup> stretch), 1639 (C=O stretch), 1453, 1387 (C-N stretch), 1258, 1088 (C-O stretch), 1004, 870, 789, 699 cm <sup>-1</sup> .                                                                                                                                                                                 |
| <b>HRMS (ESI)</b>                                     | Calcd. for C <sub>14</sub> H <sub>21</sub> NaNO <sub>3</sub> (M+Na): 274.1419, found 274.1414 <i>m/z</i> .                                                                                                                                                                                                                                           |

### $^1\text{H}$ NMR of 10

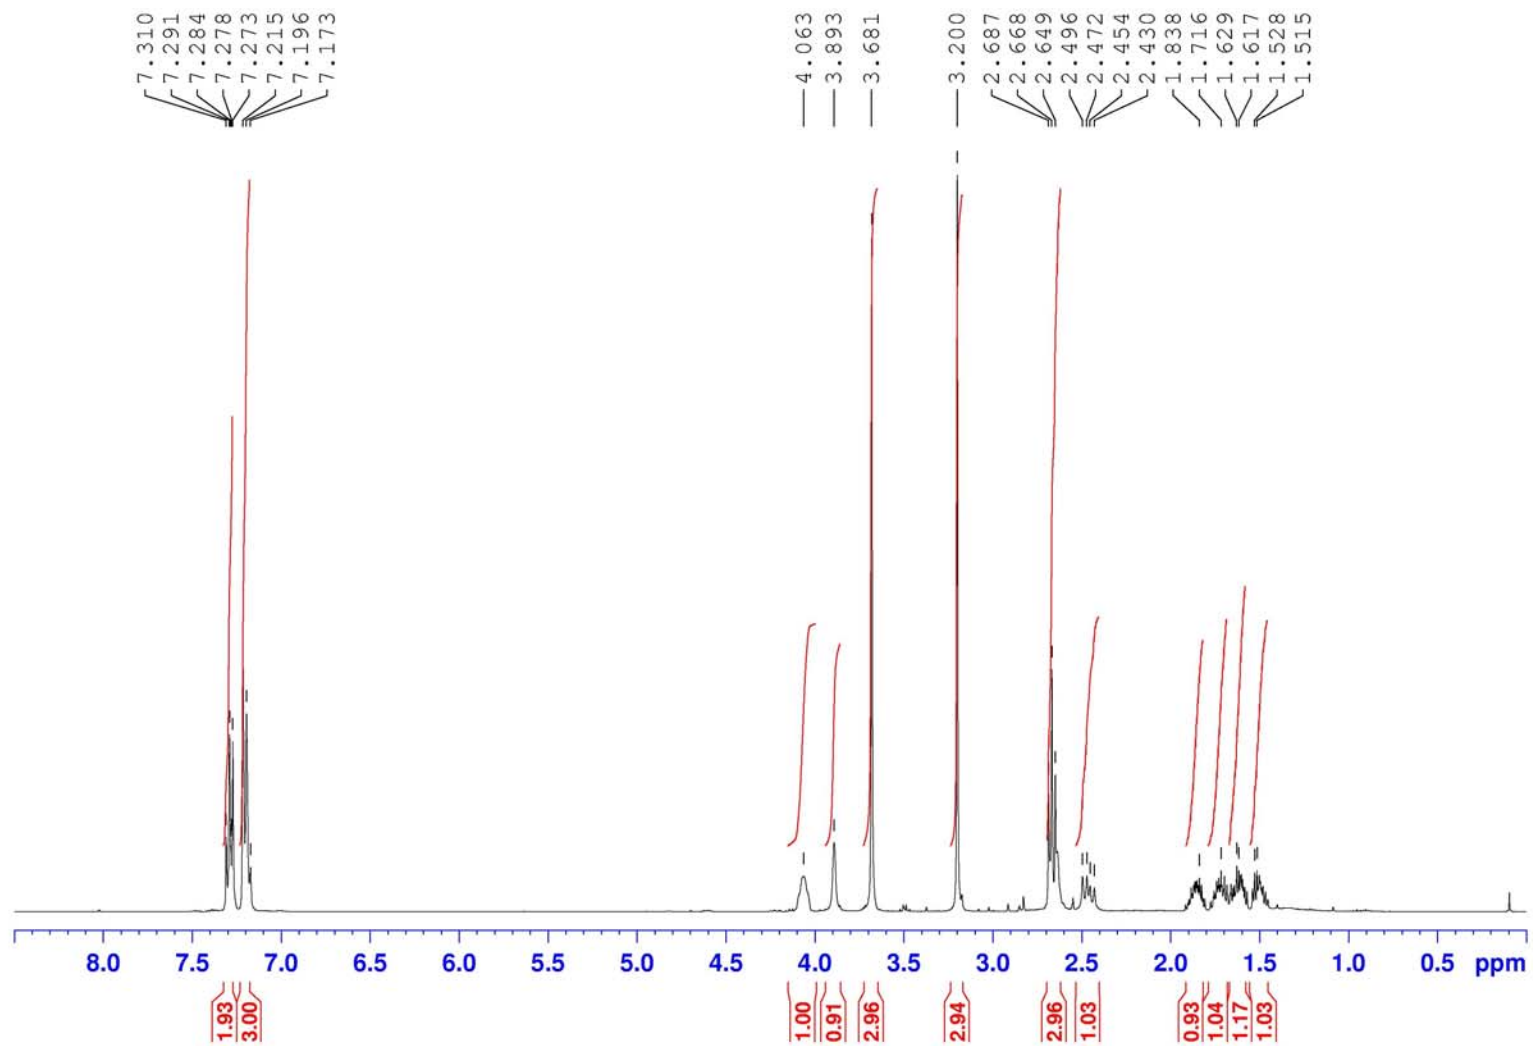

**$^{13}\text{C}$  NMR of 10**

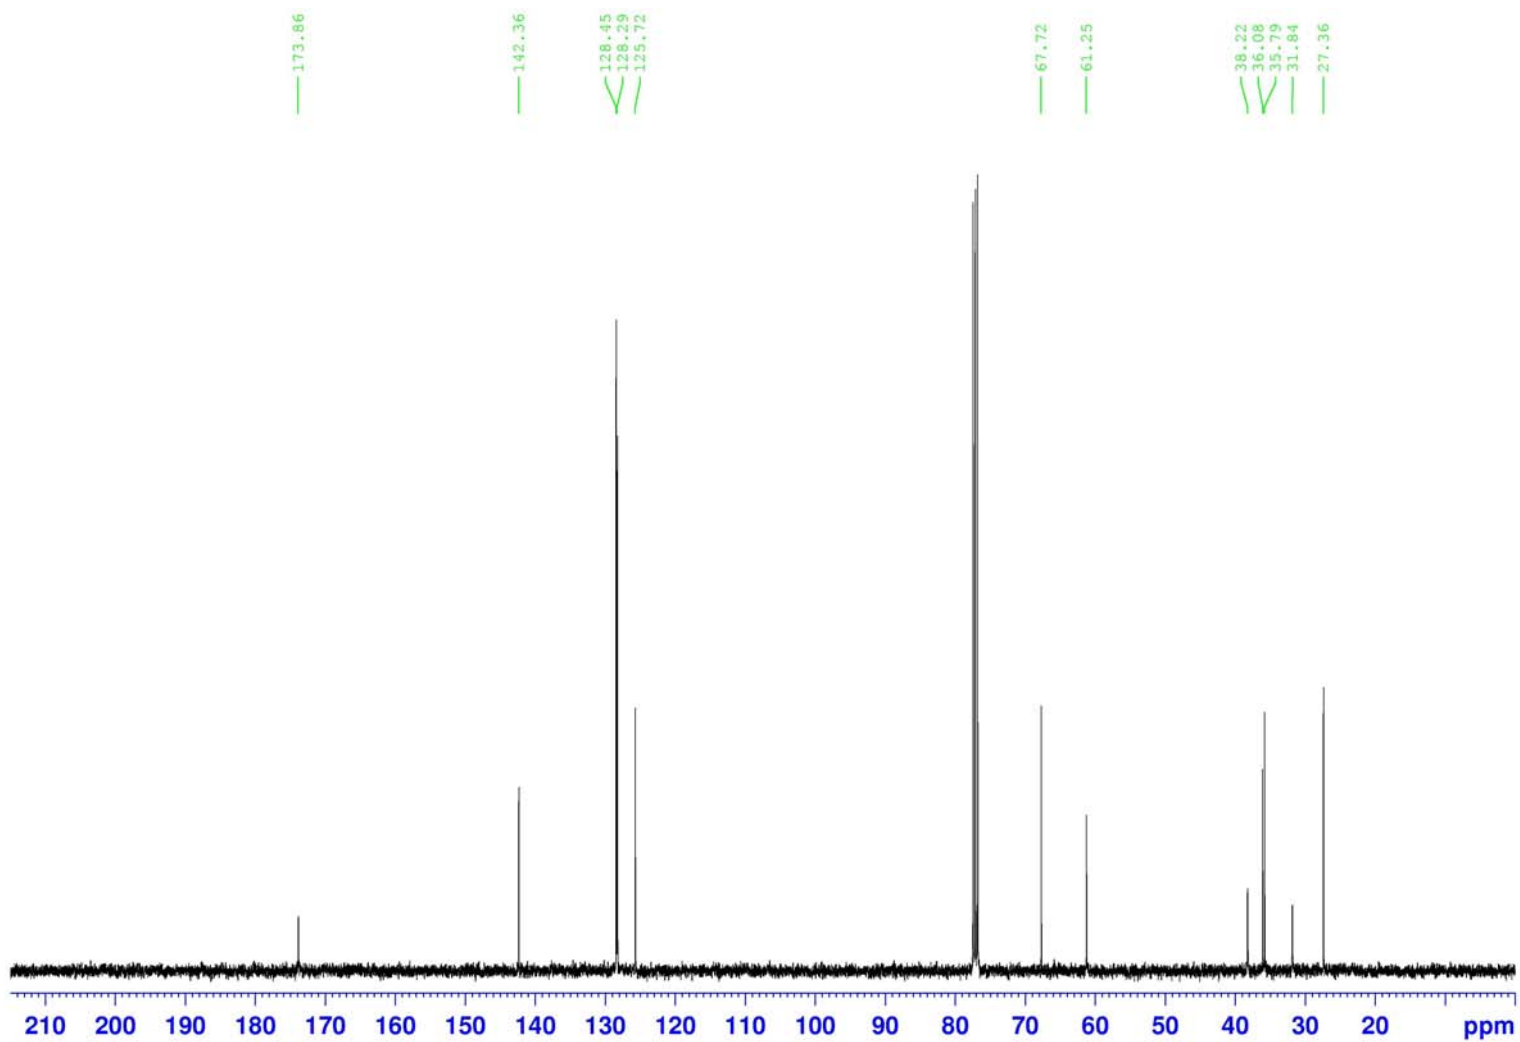

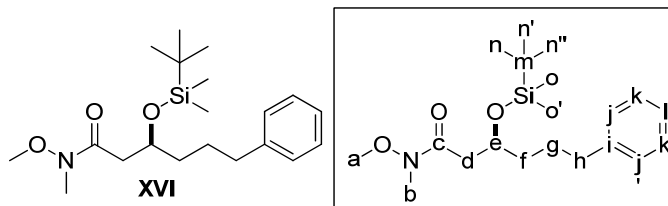

TBS-protection of **10** affords, after flash chromatography on silica gel (90:10 hexanes:ethyl acetate), the title compound (82%) as a light yellow oil.

|                                                                            |                                                                                                                                                                                                                                                                                                                                                       |
|----------------------------------------------------------------------------|-------------------------------------------------------------------------------------------------------------------------------------------------------------------------------------------------------------------------------------------------------------------------------------------------------------------------------------------------------|
| <b>TLC analysis</b>                                                        | $R_f$ 0.30 (90:10 hexanes:ethyl acetate)                                                                                                                                                                                                                                                                                                              |
| <b>Optical rotation</b>                                                    | $[\alpha]_D^{20} = +^o$ ( $c$ 0.5, $\text{CHCl}_3$ )                                                                                                                                                                                                                                                                                                  |
| <b><math>^1\text{H}</math> NMR (300 MHz, <math>\text{CDCl}_3</math>)</b>   | $\delta$ 7.35–7.25 (2H, m, k,k'), 7.25–7.15 (3H, m, j,j',l), 4.35–4.25 (1H, m, e), 3.69 (3H, s, a), 3.19 (3H, s, b), 2.75 and 2.39 (2H, overlapping dd's, $J_1 = 14.6$ Hz, 7.3 Hz, $J_2 = 14.6$ Hz, 5.3 Hz, d), 2.64 (2H, t, $J = 7.5$ Hz, h), 1.80–1.65 (2H, m, f), 1.65–1.50 (2H, m, g), 0.88 (9H, s, n,n',n''), 0.07 (3H, s, o), 0.04 (3H, s, o'). |
| <b><math>^{13}\text{C}</math> NMR (75 MHz, <math>\text{CDCl}_3</math>)</b> | $\delta$ 172.43 (c), 142.44 (i), 128.39 (j,j'), 128.27 (k,k'), 125.67 (l), 69.25 (e), 61.30 (a), 39.51 (d), 37.41 (f), 35.97 (h), 31.94 (b), 26.70 (g), 25.86 (n,n',n''), 18.04 (m), -4.65 (o), -4.71 (o').                                                                                                                                           |
| <b>IR (neat)</b>                                                           | 2929 (CH $\text{sp}^3$ stretch), 2855, 1661 (C=O stretch), 1472, 1385, 1252, 1090 (C-O stretch), 1004, 939, 834, 775, 732, 698 $\text{cm}^{-1}$ .                                                                                                                                                                                                     |
| <b>HRMS (ESI)</b>                                                          | Calcd. for $\text{C}_{20}\text{H}_{35}\text{NNaO}_3\text{Si}$ ( $\text{M}+\text{Na}$ ): 388.2284, found 388.2283 $m/z$ .                                                                                                                                                                                                                              |

### $^1\text{H}$ NMR of XVI

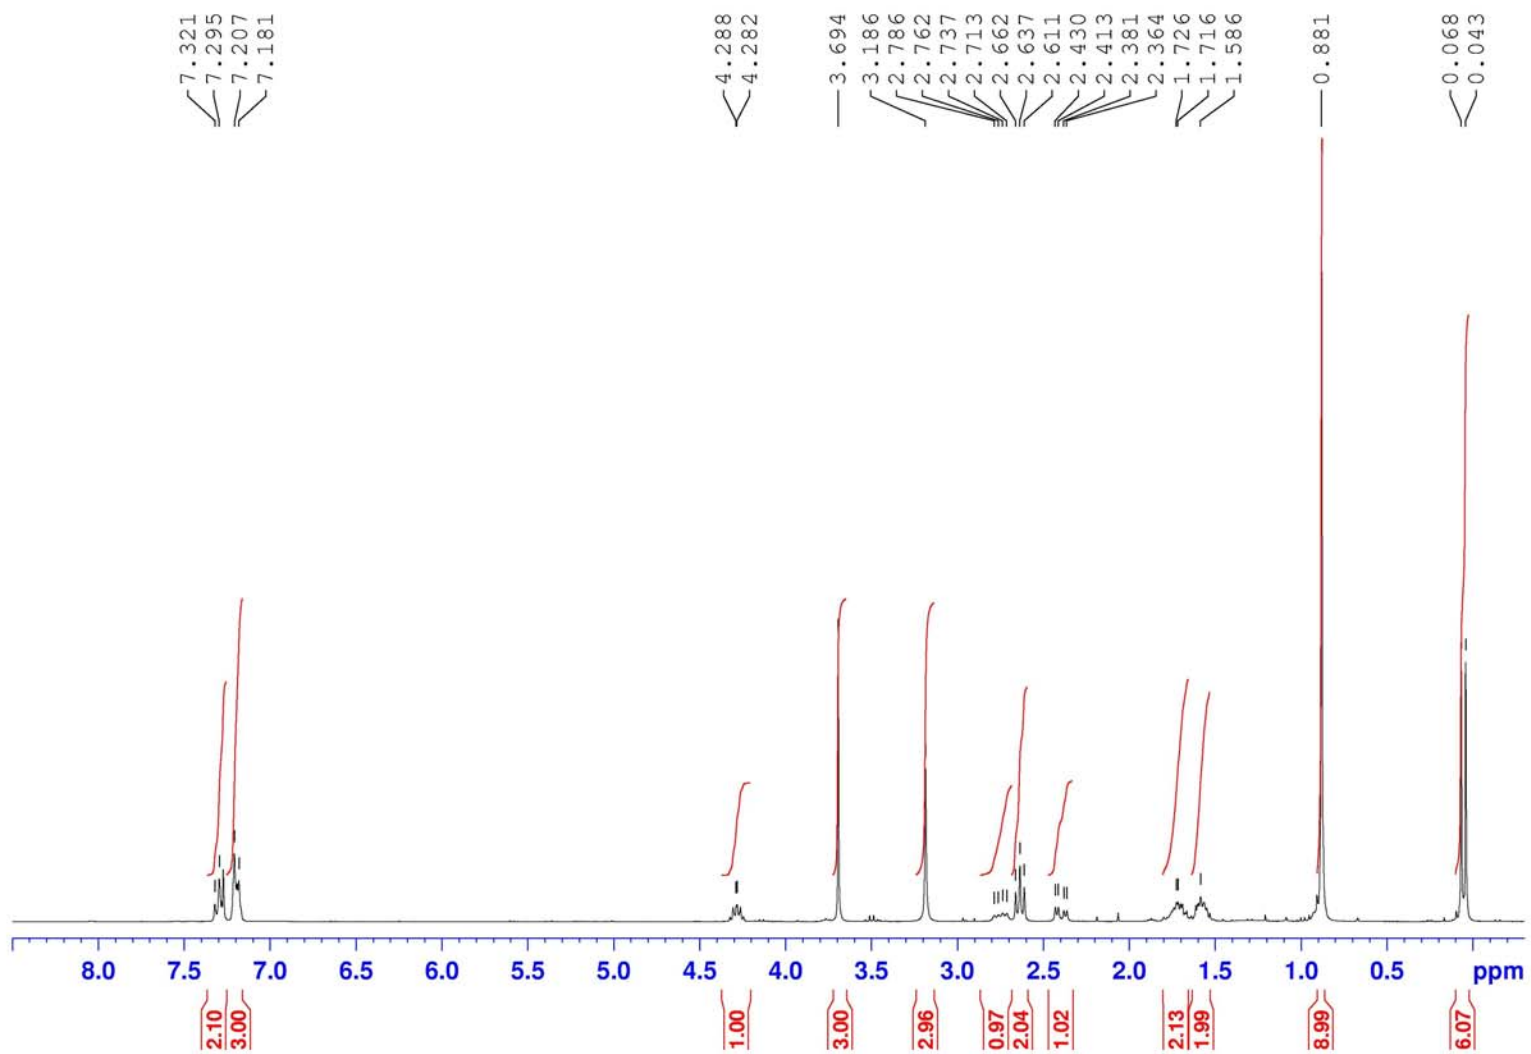

### $^{13}\text{C}$ NMR of XVI

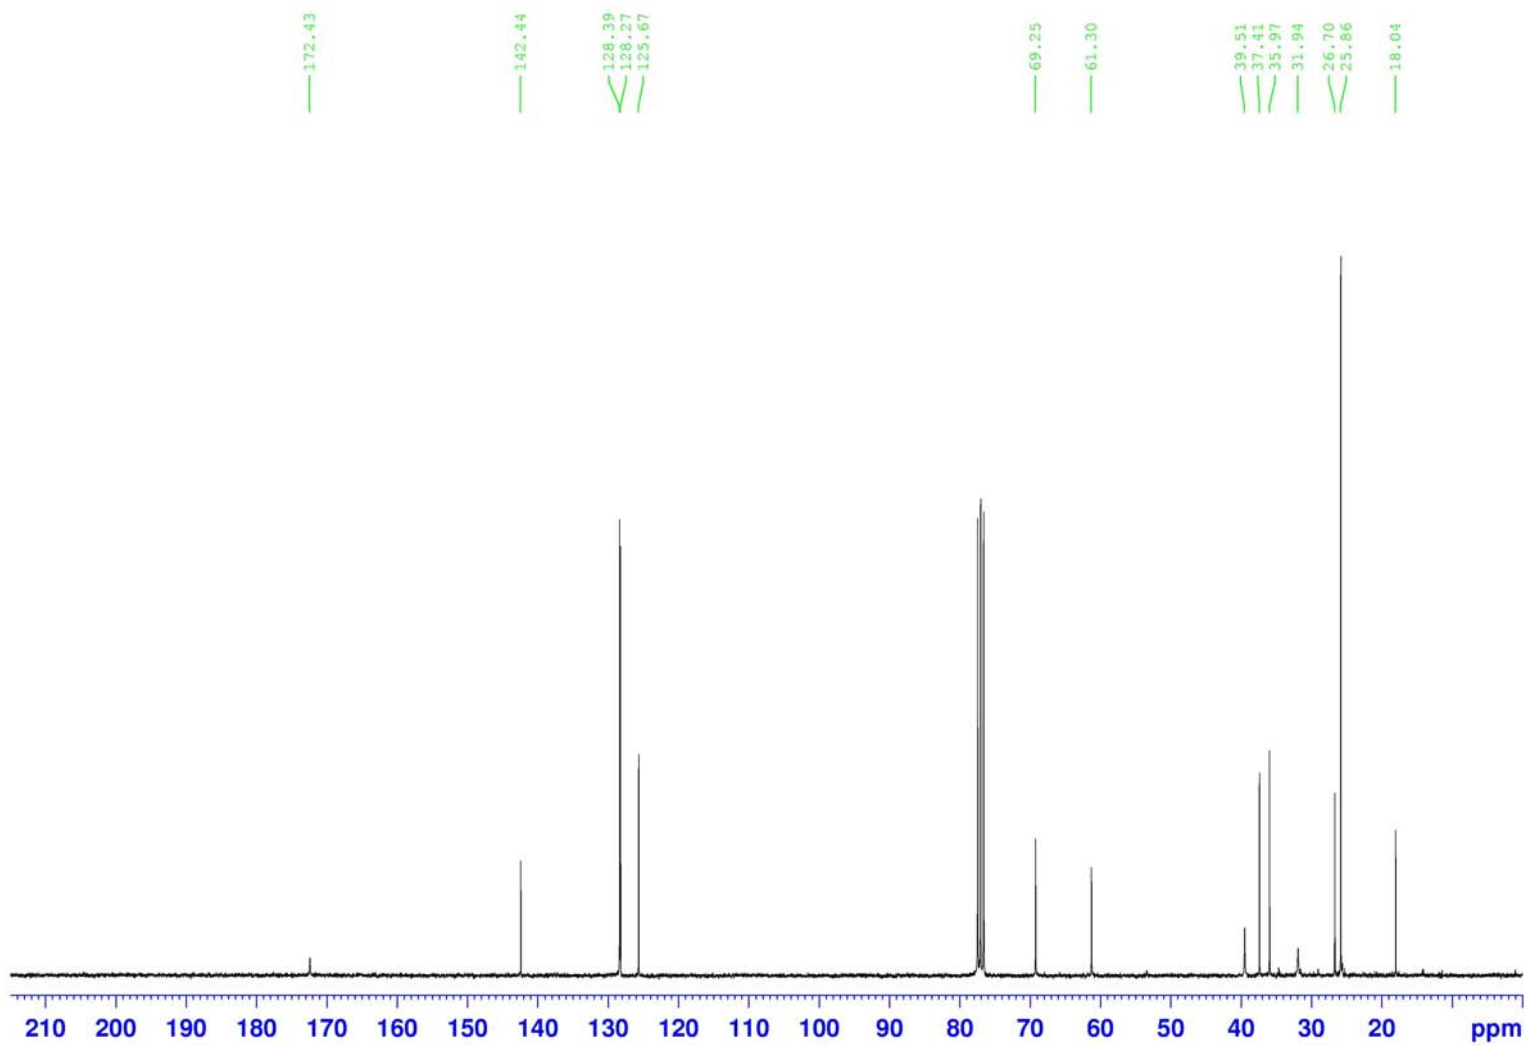

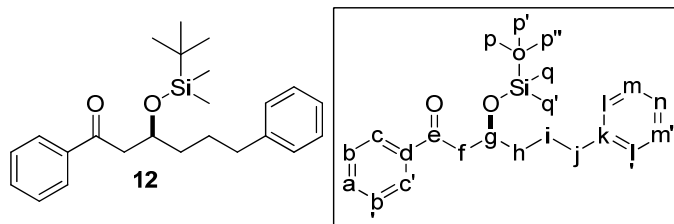

Treatment of  $\beta$ -siloxy Weinreb amide **XVI** with phenylmagnesium bromide affords, after flash chromatography on silica gel (95:5 hexanes:ethyl acetate), the title compound (94%) as a light yellow oil.

|                                                                            |                                                                                                                                                                                                                                                                                                                                                                                              |
|----------------------------------------------------------------------------|----------------------------------------------------------------------------------------------------------------------------------------------------------------------------------------------------------------------------------------------------------------------------------------------------------------------------------------------------------------------------------------------|
| <b>TLC analysis</b>                                                        | $R_f$ 0.6 (90:10 hexanes:ethyl acetate)                                                                                                                                                                                                                                                                                                                                                      |
| <b>Optical rotation</b>                                                    | $[\alpha]_D^{20} = +21.2^\circ$ ( $c$ 0.5, $\text{CHCl}_3$ )                                                                                                                                                                                                                                                                                                                                 |
| <b><math>^1\text{H}</math> NMR (300 MHz, <math>\text{CDCl}_3</math>)</b>   | $\delta$ 8.05–7.95 (2H, m, c,c'), 7.60–7.55 (1H, m, a), 7.55–7.45 (2H, m, b,b'), 7.35–7.25 (2H, m, m,m'), 7.25–7.15 (3H, m, l,l',n), 4.45–4.35 (1H, m, g), 3.26 and 2.93 (2H, overlapping dd's, $J_1 = 15.4$ Hz, 7.1 Hz, $J_2 = 15.4$ Hz, 5.3 Hz, f), 2.66 (2H, t, $J = 7.3$ Hz, j), 1.80–1.70 (2H, m, h), 1.70–1.55 (2H, m, i), 0.83 (9H, s, p,p',p''), 0.06 (3H, s, q), -0.06 (3H, s, q'). |
| <b><math>^{13}\text{C}</math> NMR (75 MHz, <math>\text{CDCl}_3</math>)</b> | $\delta$ 199.43 (e), 142.36 (k), 137.63 (d), 133.00 (a), 128.51 (b,b'), 128.40 (l,l'), 128.39 (m,m'), 128.31 (c,c'), 125.74 (n), 69.38 (g), 45.96 (f), 37.58 (h), 35.96 (j), 26.72 (i), 25.82 (p,p',p''), 17.99 (o), -4.62 (q), -4.73 (q').                                                                                                                                                  |
| <b>IR (neat)</b>                                                           | 2928 (CH $\text{sp}^3$ stretch), 2855, 1684 (C=O stretch), 1598, 1474, 1448, 1360, 1252, 1210, 1090 (C-O stretch), 1019, 1003, 833, 775, 669 $\text{cm}^{-1}$ .                                                                                                                                                                                                                              |
| <b>HRMS (ESI)</b>                                                          | Calcd. for $\text{C}_{24}\text{H}_{34}\text{NaO}_2\text{Si}$ (M+Na): 405.2226, found 405.2223 $m/z$ .                                                                                                                                                                                                                                                                                        |

### $^1\text{H}$ NMR of 12

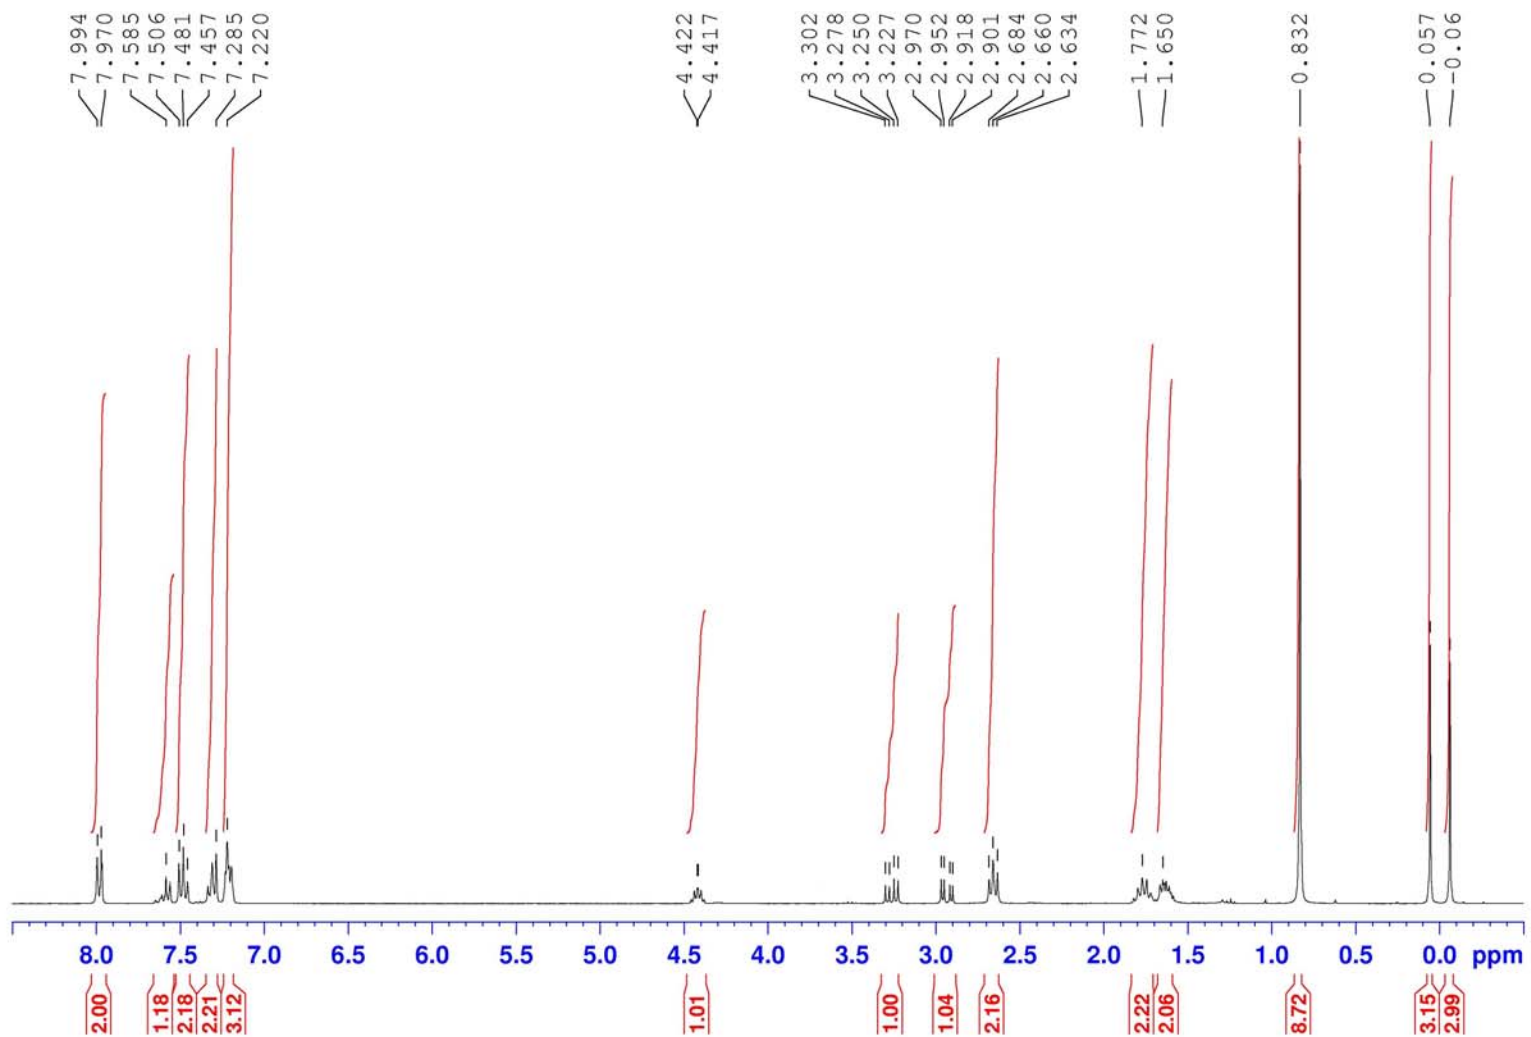



### $^{13}\text{C}$ NMR of 12

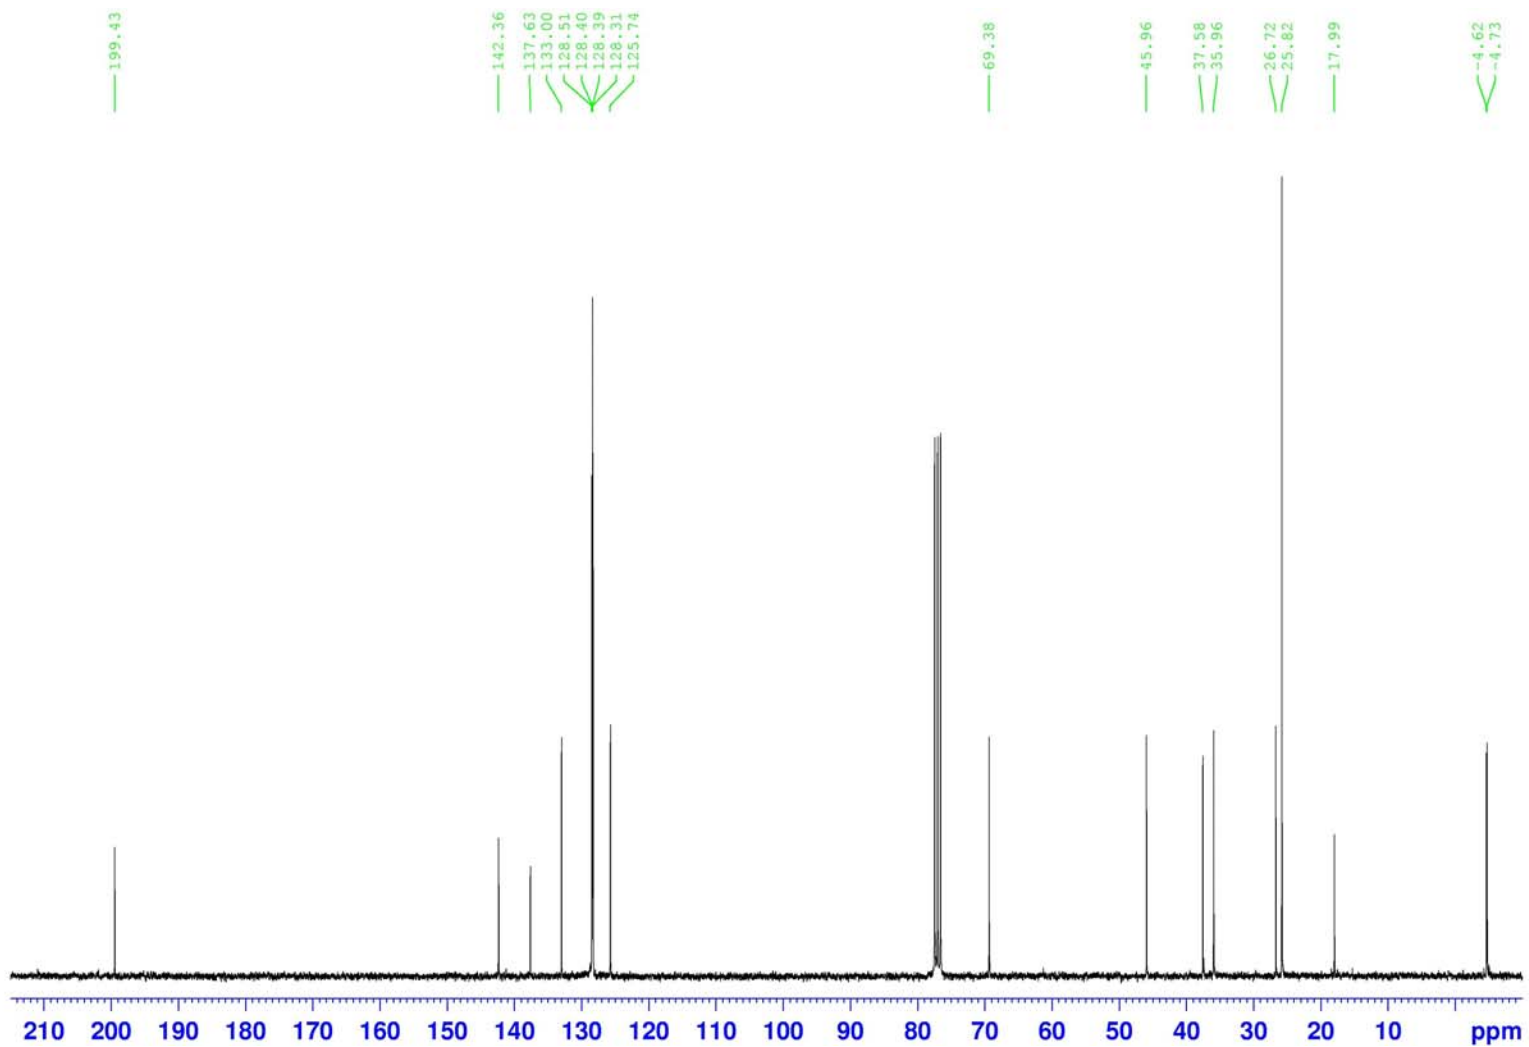

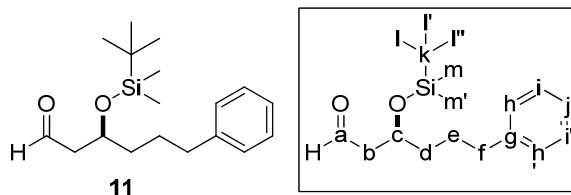

Half reduction of  $\beta$ -siloxy Weinreb amide **XVI** with DIBAL-H affords, after flash chromatography on silica gel (95:5 hexanes:ethyl acetate), the title compound (91%) as a light yellow oil.

|                                                      |                                                                                                                                                                                                                                                                      |
|------------------------------------------------------|----------------------------------------------------------------------------------------------------------------------------------------------------------------------------------------------------------------------------------------------------------------------|
| <b>TLC analysis</b>                                  | $R_f$ 0.4 (90:10 hexanes:ethyl acetate)                                                                                                                                                                                                                              |
| <b>Optical rotation</b>                              | $[\alpha]_D^{20} = +5.5^\circ$ ( $c$ 0.5, CHCl <sub>3</sub> )                                                                                                                                                                                                        |
| <b><sup>1</sup>H NMR (300 MHz, CDCl<sub>3</sub>)</b> | $\delta$ 9.81 (1H, t, $J = 2.3$ Hz, a), 7.35–7.25 (2H, m, i,i'), 7.25–7.15 (3H, m, h,h',j), 4.25–4.15 (1H, m, c), 2.70–2.60 (2H, m, f), 2.60–2.50 (2H, m, b), 2.75–2.65 (2H, m, d), 2.65–2.55 (2H, m, e), 0.89 (9H, s, l,l',l''), 0.07 (3H, s, m), 0.06 (3H, s, m'). |
| <b><sup>13</sup>C NMR (75 MHz, CDCl<sub>3</sub>)</b> | $\delta$ 202.24 (a), 142.06 (g), 128.35 (h,h',i,i'), 125.83 (j), 68.00 (c), 50.80 (b), 37.29 (d), 35.78 (f), 26.73 (e), 25.76 (l,l',l''), 17.98 (k), -4.44 (m), -4.70 (m').                                                                                          |
| <b>IR (neat)</b>                                     | 2929 (CH sp <sup>3</sup> stretch), 2857, 1725 (C=O stretch), 1471, 1361, 1253, 1095 (C-O stretch), 1027, 1005, 834, 774, 698 cm <sup>-1</sup> .                                                                                                                      |

### $^1\text{H}$ NMR of 11

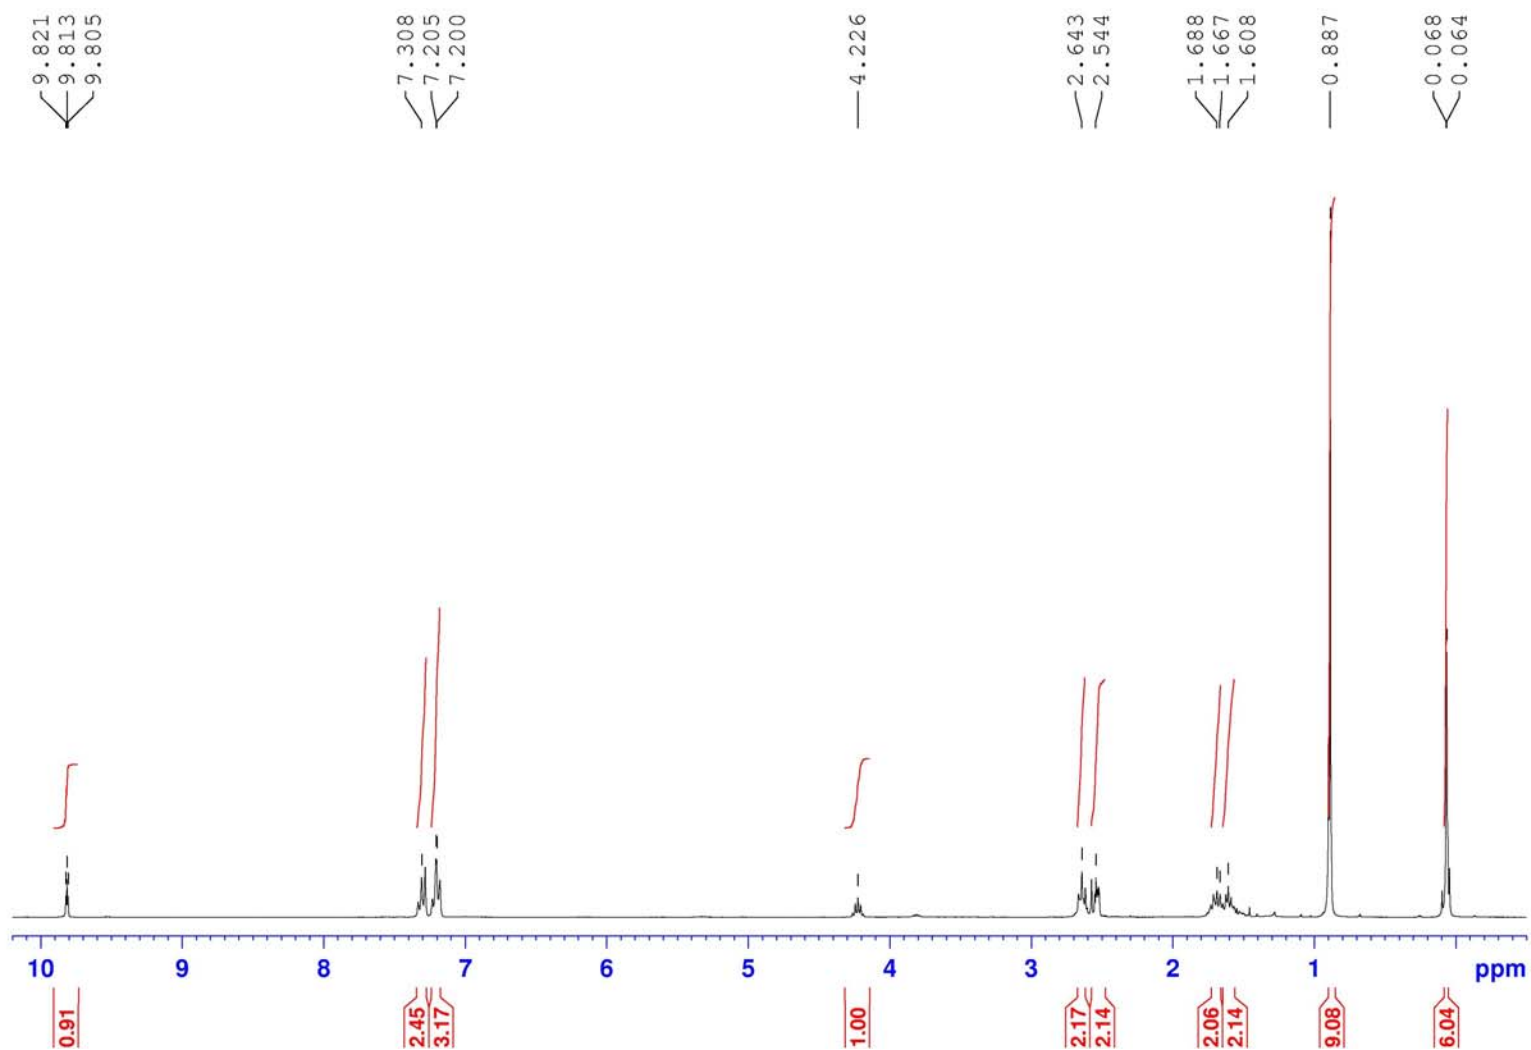

### $^{13}\text{C}$ NMR of 11

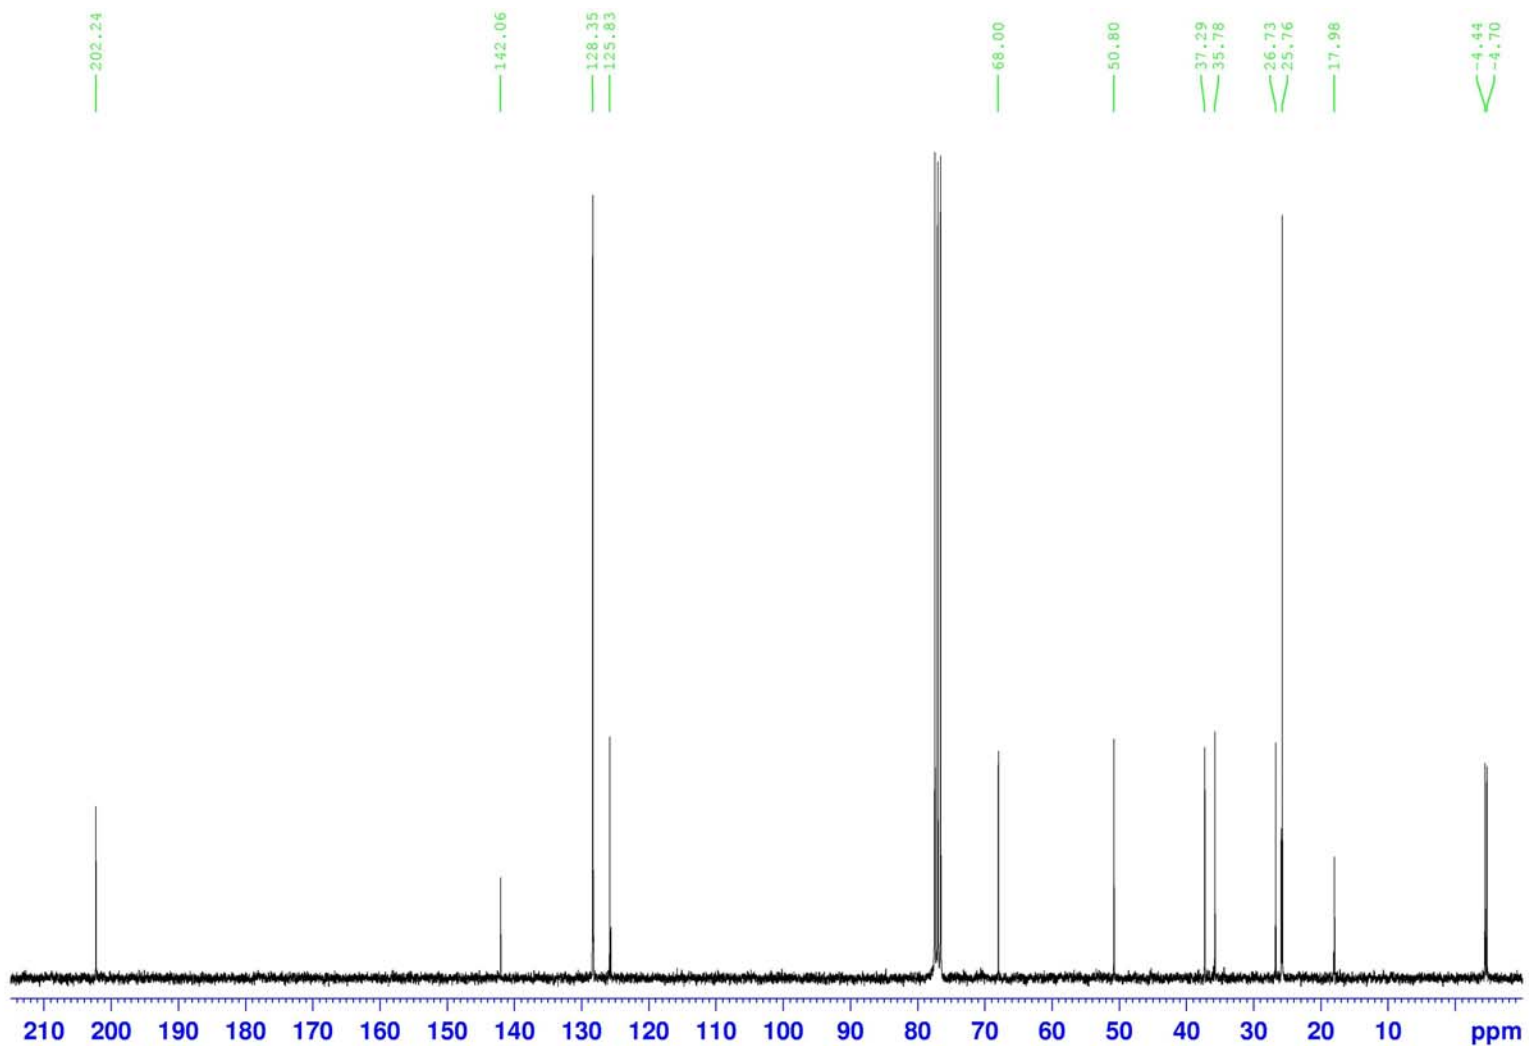

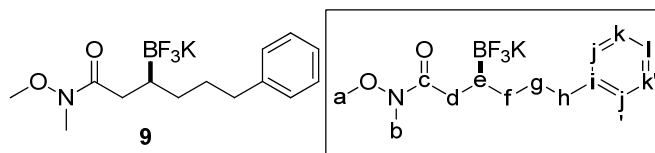

Treatment of  $\beta$ -borato Weinreb amide **8** with satd. aq  $\text{KHF}_2$  affords the title compound (82%) as a white solid.

|                                                       |                                                                                                                                                                                                                                                      |
|-------------------------------------------------------|------------------------------------------------------------------------------------------------------------------------------------------------------------------------------------------------------------------------------------------------------|
| <b>m.p.</b>                                           | 235–236 °C                                                                                                                                                                                                                                           |
| <b>Optical rotation</b>                               | $[\alpha]_{\text{D}}^{20} = -10.2^\circ$ ( <i>c</i> 0.5, MeOH)                                                                                                                                                                                       |
| <b><math>^1\text{H}</math> NMR (300 MHz, MeOD)</b>    | $\delta$ 7.25–7.20 (2H, m, k,k'), 7.20–7.15 (2H, m, j,j'), 7.15–7.05 (1H, m, l), 3.68 (3H, s, a), 3.17 (3H, s, b), 2.60–2.50 (2H, m, h), 2.40–2.20 (2H, m, d), 1.70–1.60 (2H, m, g), 1.55–1.45 (1H, m, f), 1.30–1.15 (1H, m, f), 0.95 (1H, br s, e). |
| <b><math>^{13}\text{C}</math> NMR (75 MHz, MeOD)</b>  | $\delta$ 178.71 (c), 143.39 (i), 128.05 (j,j'), 127.68 (k,k'), 124.90 (l), 60.26 (a), 36.41 (h), 33.44 (d), 31.18 (e,f), 30.90 (b,g).                                                                                                                |
| <b><math>^{19}\text{F}</math> NMR (376 MHz, MeOD)</b> | $\delta$ -146.53.                                                                                                                                                                                                                                    |
| <b>IR (neat)</b>                                      | 2958 (CH $\text{sp}^3$ stretch), 2856, 1668 (C=O stretch), 1454, 1390, 1300, 1144 (C-O stretch), 1000, 955, 854, 660 $\text{cm}^{-1}$ .                                                                                                              |
| <b>HRMS (CI)</b>                                      | Calcd. for (M- $\text{BF}_3\text{K}+2\text{H}$ ): 236.1651, found 236.1654 <i>m/z</i> .                                                                                                                                                              |

### $^1\text{H}$ NMR of **9**

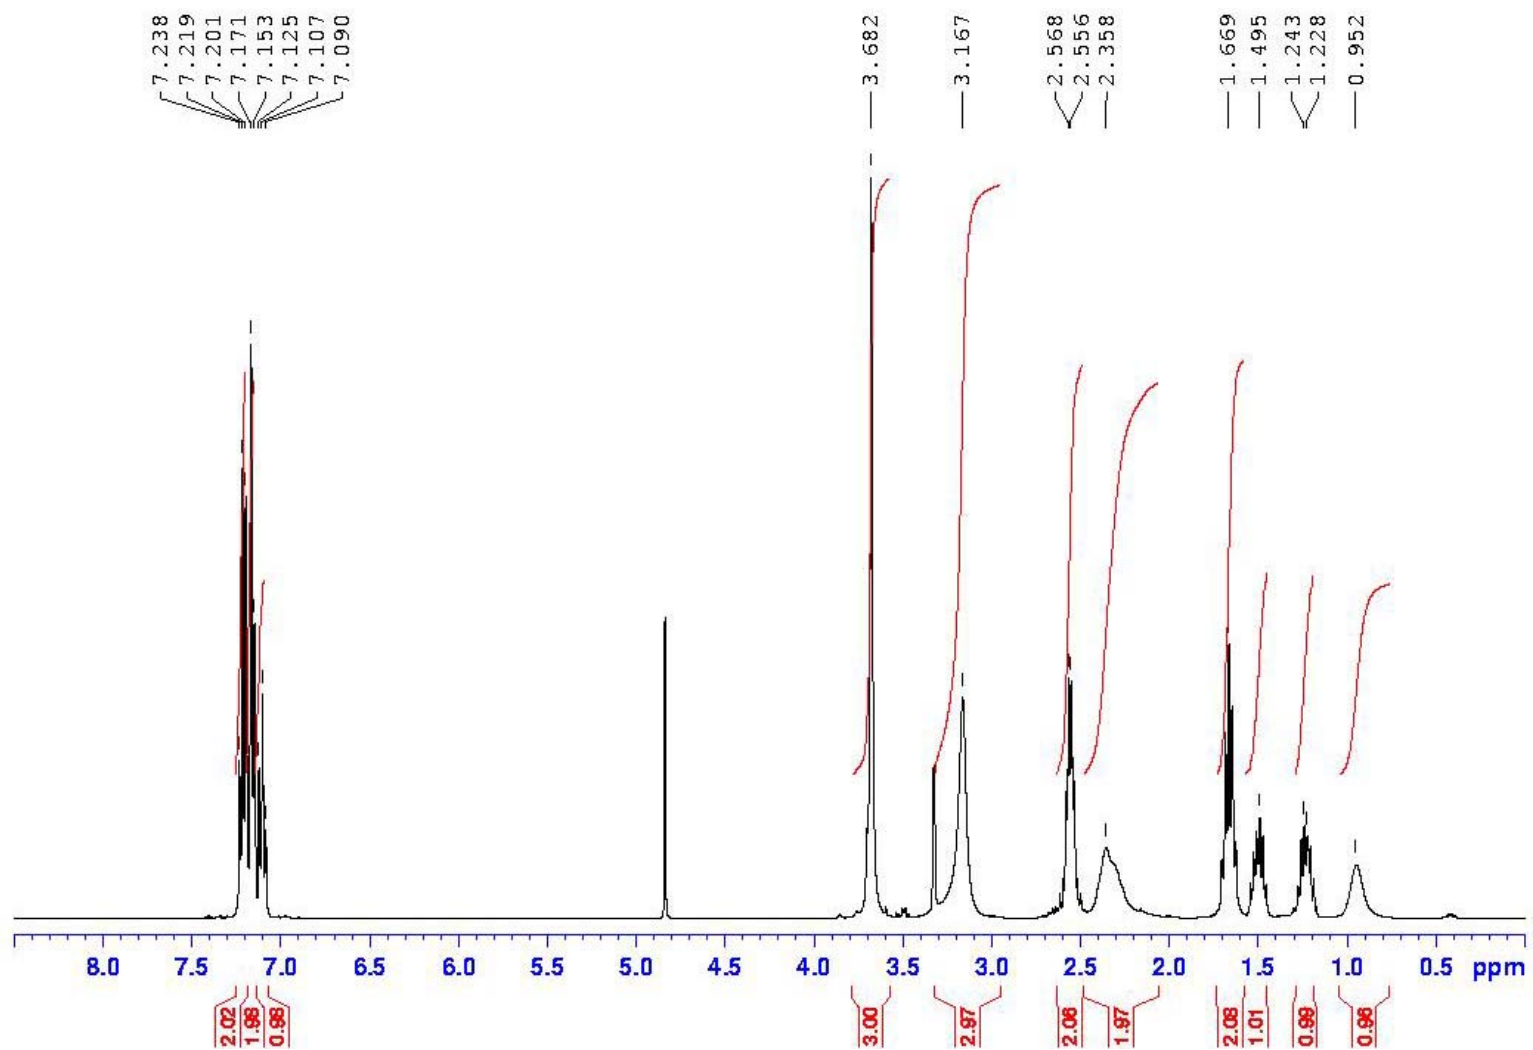

$^{13}\text{C}$  NMR of **9**

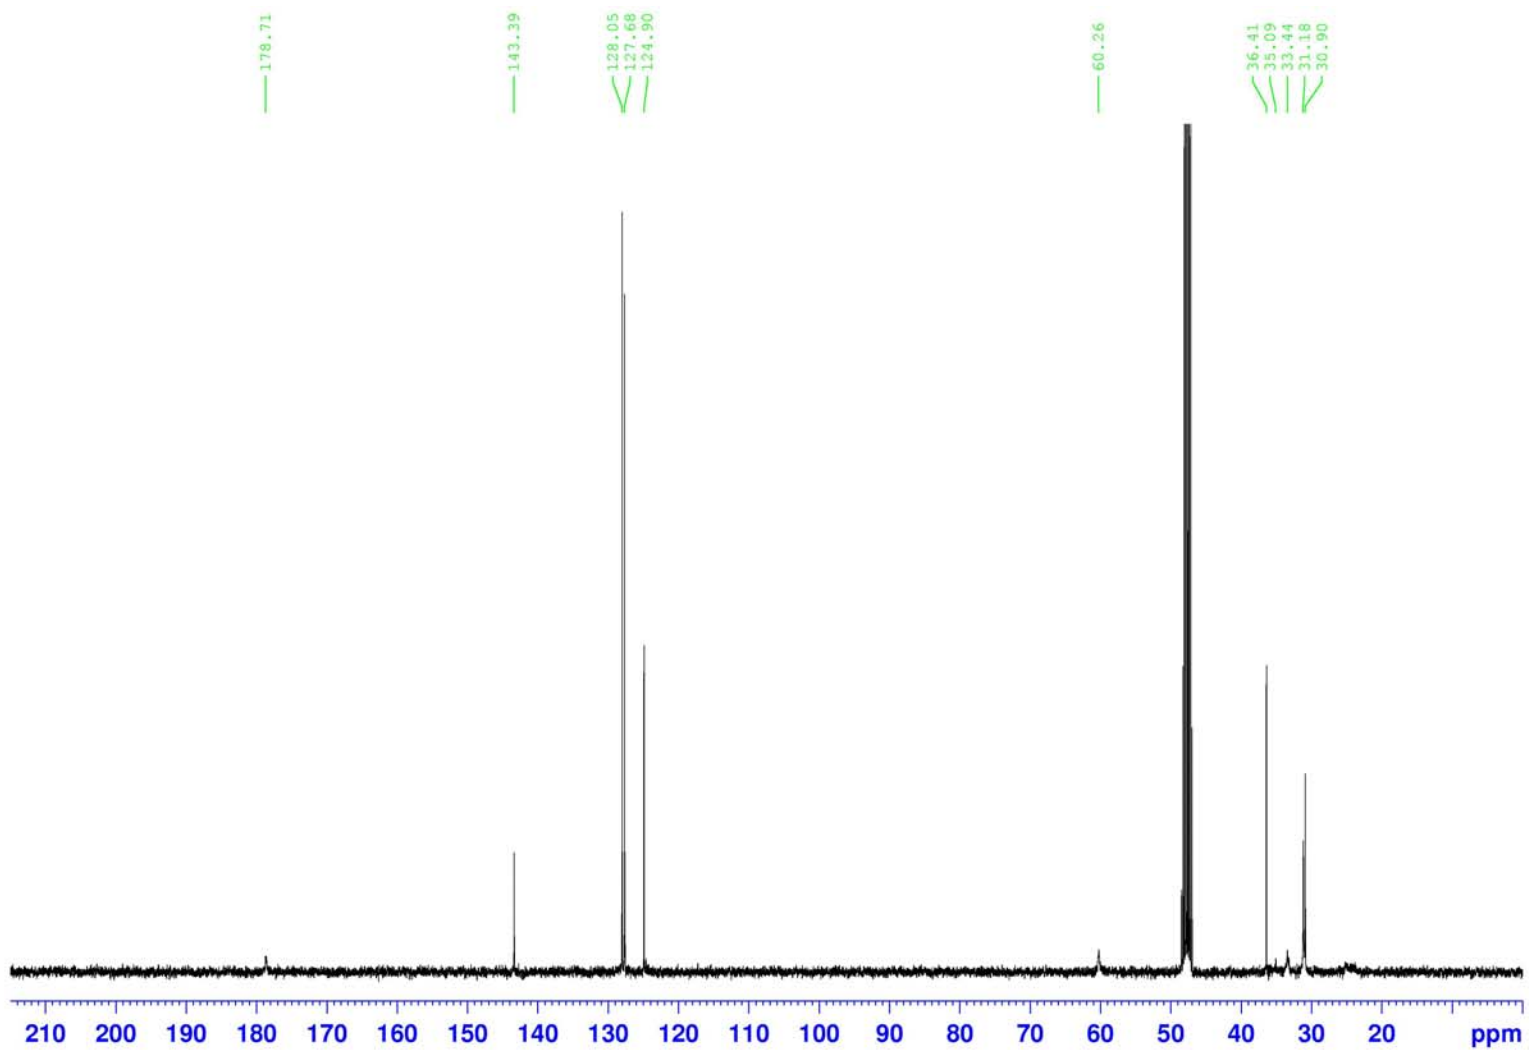

**$^{19}\text{F}$  NMR of **9****

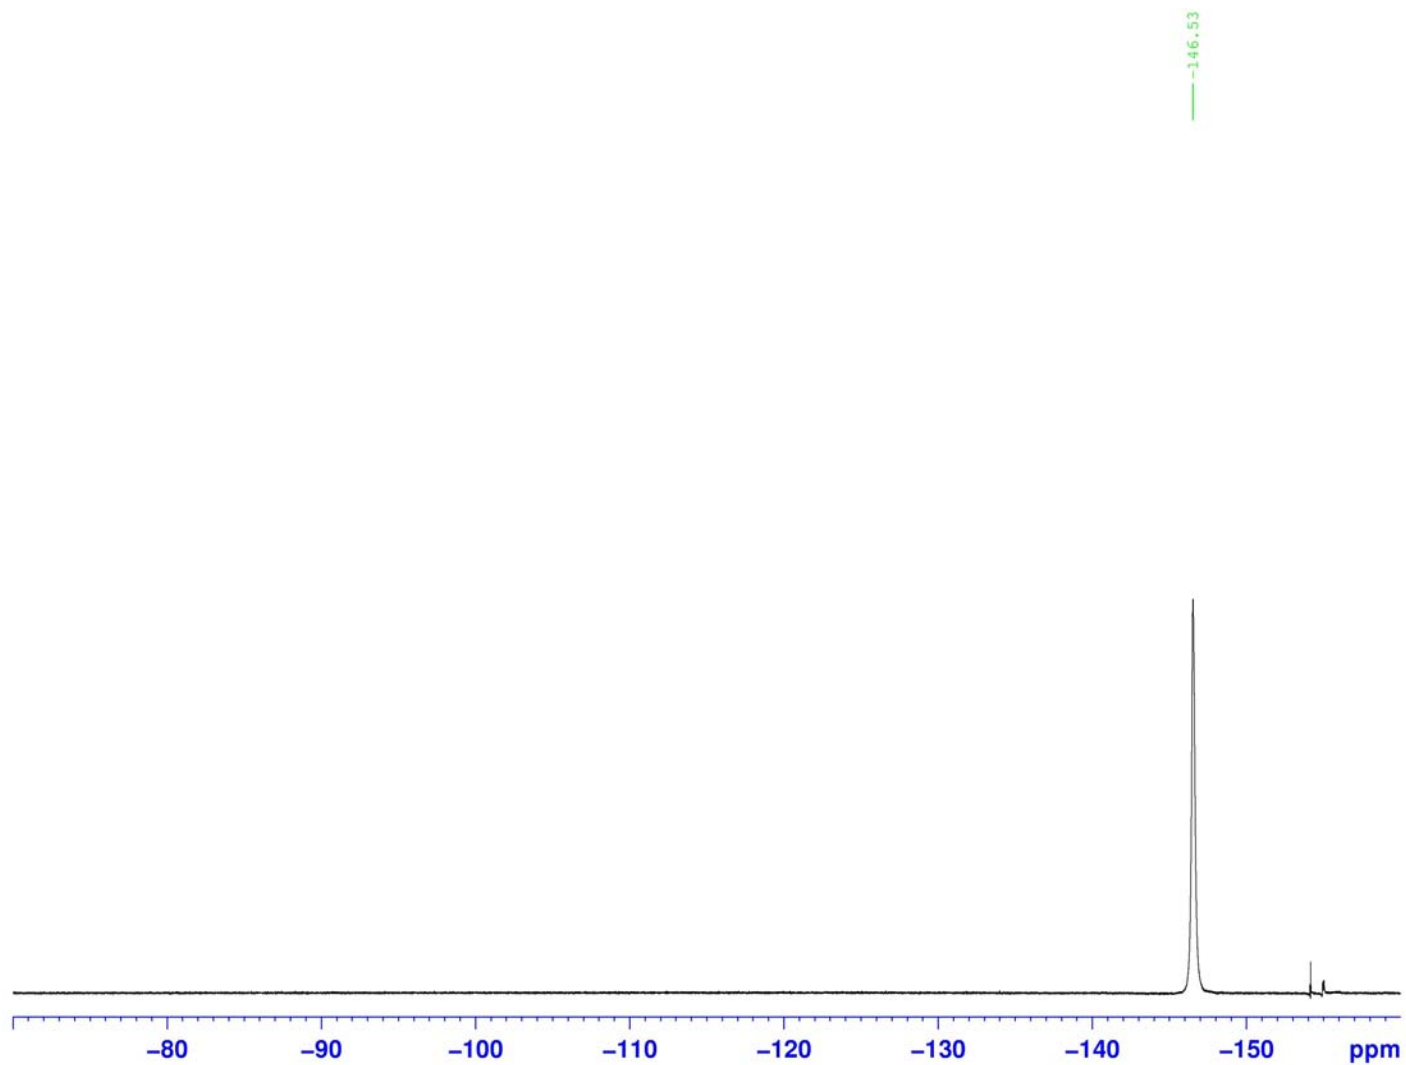



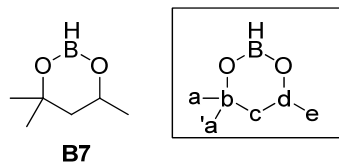

The general procedure for the preparation of 1,3,2-dioxaborolanes affords, after bulb-to-bulb distillation, the title compound (75%) as a colorless liquid.

|                                                                         |                                                                                                                                                                                |
|-------------------------------------------------------------------------|--------------------------------------------------------------------------------------------------------------------------------------------------------------------------------|
| <b>b.p.</b>                                                             | 160–165 °C                                                                                                                                                                     |
| <b><sup>1</sup>H NMR (300 MHz, CDCl<sub>3</sub>)</b>                    | $\delta$ 4.30–4.15 (1H, m, d), 3.84 (1H, q, $J = 155.6$ Hz, BH), 1.90–1.75 (1H, m, c), 1.60–1.45 (1H, m, c), 1.31 (3H, s, a), 1.29 (3H, s, a'), 1.26 (3H, d, $J = 6.2$ Hz, e). |
| <b><sup>13</sup>C NMR (75 MHz, CDCl<sub>3</sub>)</b>                    | $\delta$ 70.99 (b), 64.73 (d), 46.17 (c), 31.02 (a), 28.14 (a'), 22.93 (e).                                                                                                    |
| <b><sup>11</sup>B NMR (193 MHz, THF with residual CDCl<sub>3</sub>)</b> | $\delta$ 24.96 (d, $J = 169.1$ Hz).                                                                                                                                            |
| <b>IR (neat)</b>                                                        | 2976 (CH sp <sup>3</sup> stretch), 2879, 2400, 1495, 1427, 1384, 1291, 1156 (C-O stretch), 1094, 1024, 889, 789, 666 cm <sup>-1</sup> .                                        |
| <b>HRMS (CI)</b>                                                        | Calcd. for C <sub>6</sub> H <sub>14</sub> BO <sub>2</sub> (M+H): 129.1087, found 129.1082 $m/z$ .                                                                              |

### $^1\text{H}$ NMR of B7

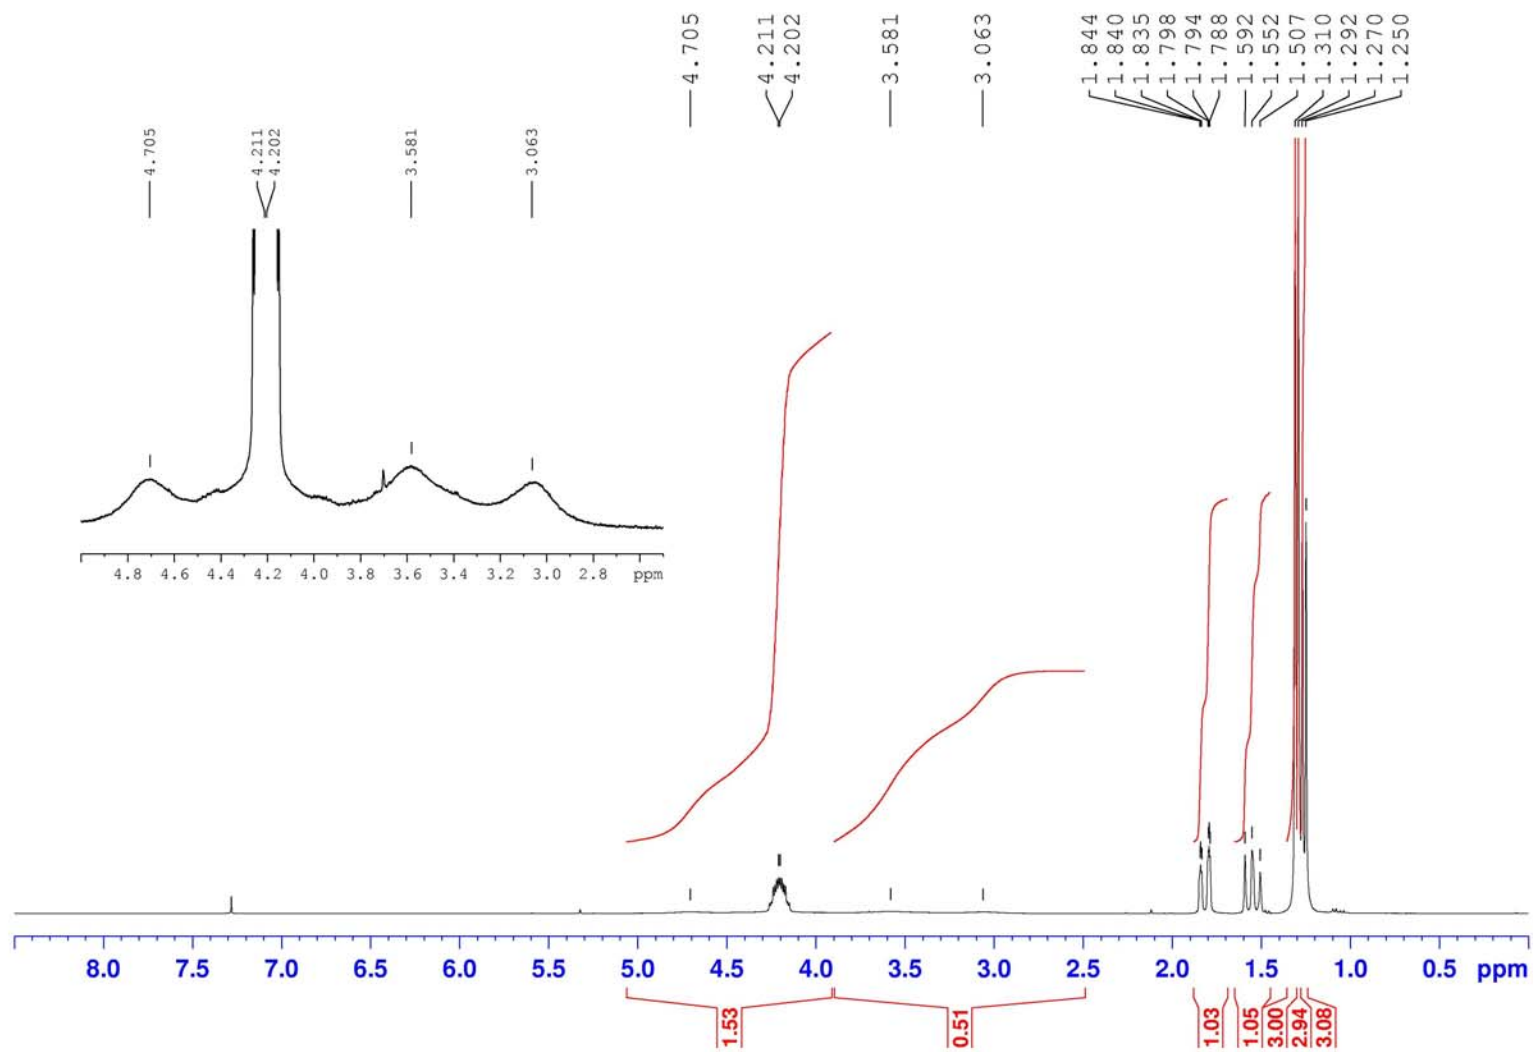

### $^{13}\text{C}$ NMR of B7

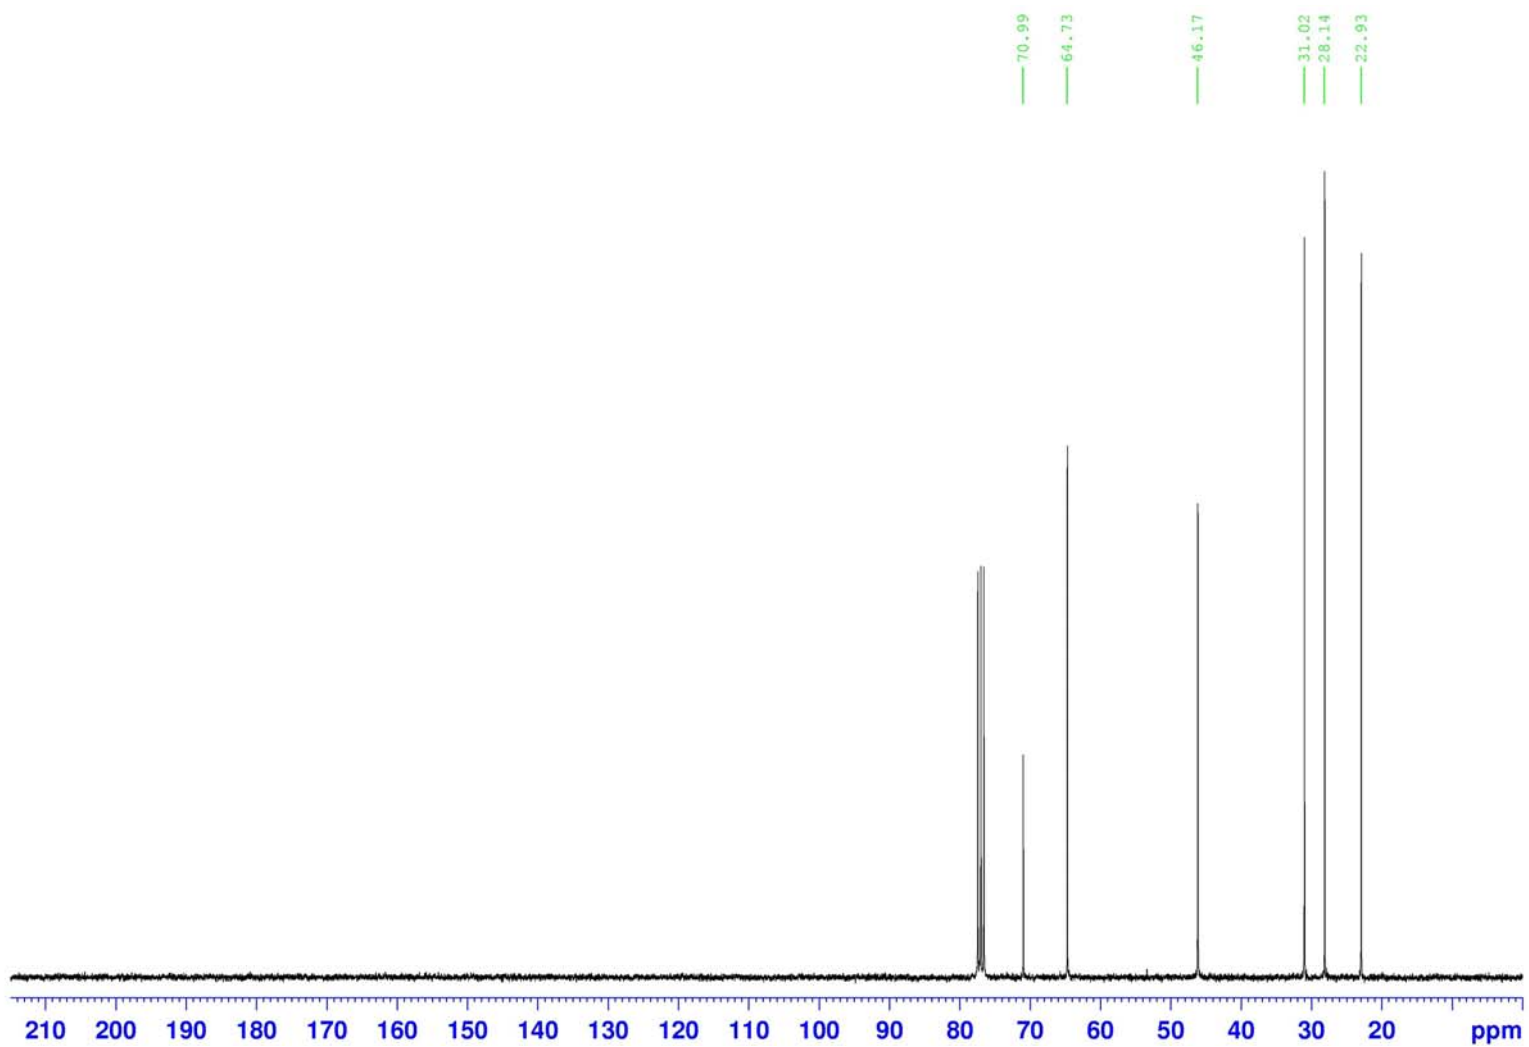

### $^{11}\text{B}$ NMR of B7

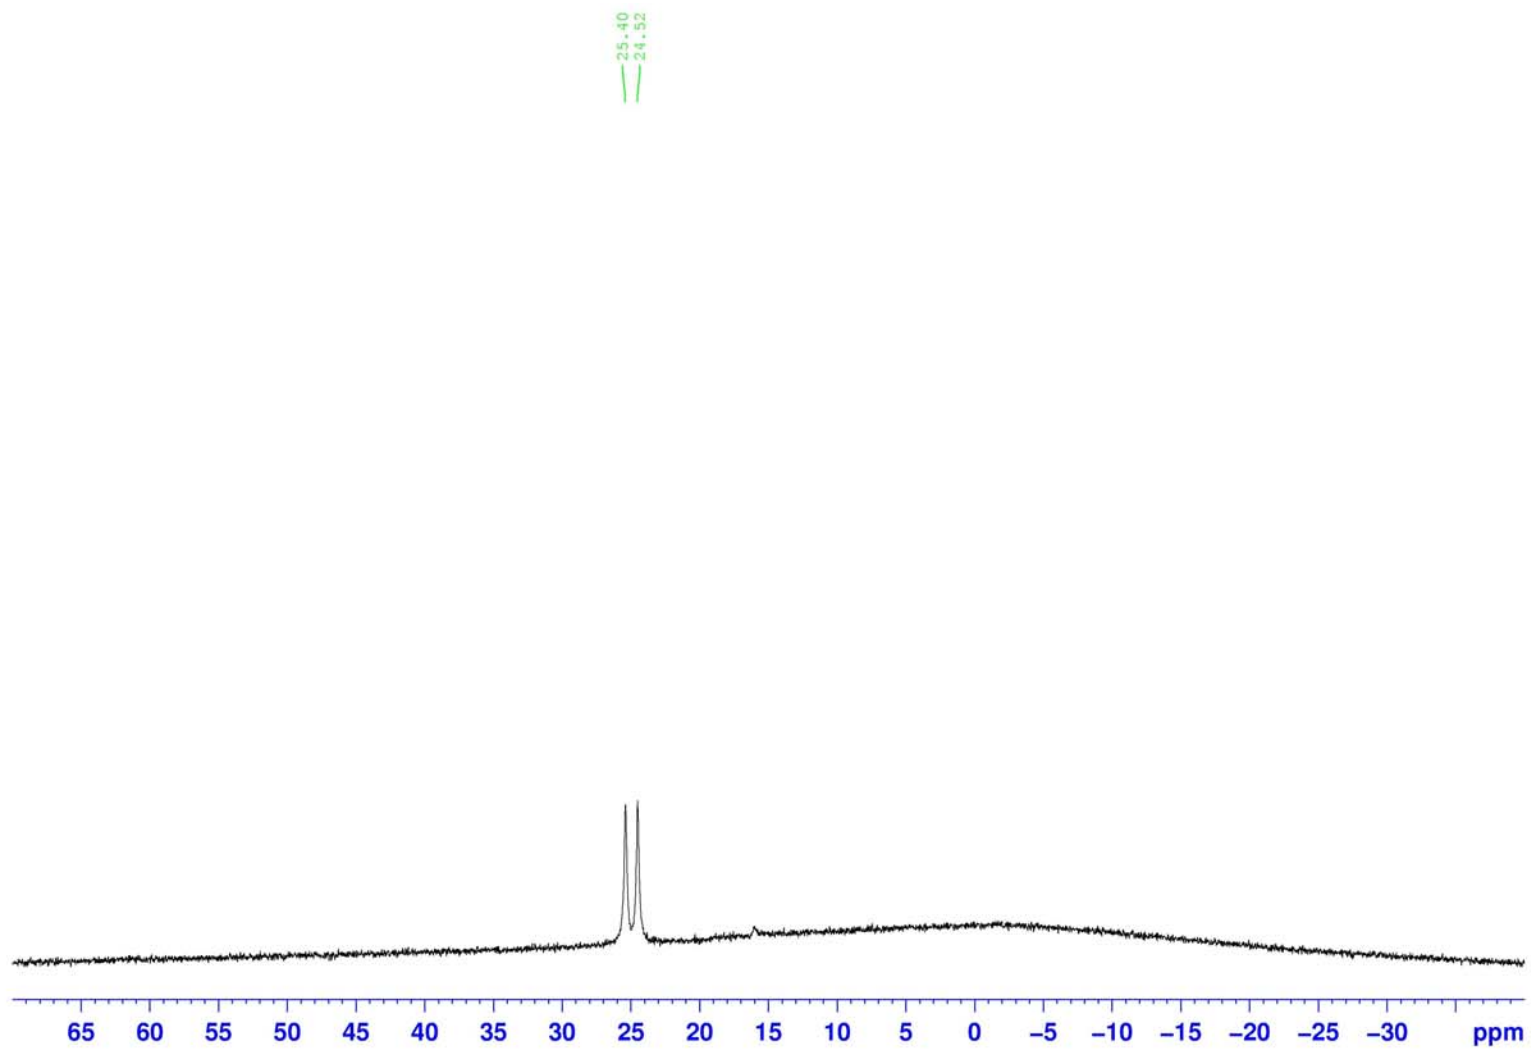

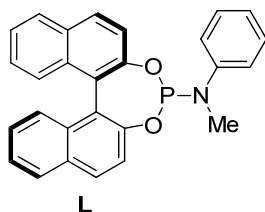

The general procedure for the preparation of phosphoramidites affords, after flash chromatography on silica gel (92:8 hexanes:ethyl acetate), the title compound (68%) as a white foamy solid.

|                                                                             |                                                                                                                                                                                                                                             |
|-----------------------------------------------------------------------------|---------------------------------------------------------------------------------------------------------------------------------------------------------------------------------------------------------------------------------------------|
| <b>m.p.</b>                                                                 | 94–95 °C                                                                                                                                                                                                                                    |
| <b>Optical rotation</b>                                                     | $[\alpha]_{\text{D}}^{20} = -87.2^{\circ}$ ( <i>c</i> 0.5, ethanol)                                                                                                                                                                         |
| <b>TLC analysis</b>                                                         | $R_f$ 0.60 (75:25 hexanes: DCM)                                                                                                                                                                                                             |
| <b><math>^1\text{H}</math> NMR (400 MHz, <math>\text{CDCl}_3</math>)</b>    | $\delta$ 8.03 (1H, d, $J = 8.8$ Hz), 8.00-7.90 (3H, m), 7.60-7.55 (1H, m), 7.50-7.41 (4H, m), 7.41-7.25 (7H, m), 7.17-7.10 (1H, m), 2.67 (3H, d, $J = 2.51$ Hz).                                                                            |
| <b><math>^{13}\text{C}</math> NMR (100 MHz, <math>\text{CDCl}_3</math>)</b> | $\delta$ 149.89, 149.18, 146.39, 146.13 132.86, 132.64, 131.53, 130.90, 130.49, 130.24, 129.17, 128.39, 128.33, 127.02, 126.93, 126.22, 124.98, 124.79, 124.07, 123.23, 122.72, 121.83, 121.28, 121.12, 33.53 ( $J_{\text{CP}} = 4.02$ Hz). |
| <b><math>^{31}\text{P}</math> NMR (162 MHz, <math>\text{CDCl}_3</math>)</b> | $\delta$ 143.76.                                                                                                                                                                                                                            |
| <b>IR (neat)</b>                                                            | 3061, 2935 (P-O stretch), 1589, 1489, 1330, 1269, 1226, 1061, 938, 804, 769 $\text{cm}^{-1}$ .                                                                                                                                              |
| <b>HRMS (FAB)</b>                                                           | Calcd. for $\text{C}_{27}\text{H}_{20}\text{NO}_2\text{P}$ (M+H): 422.1310, found 422.1307 $m/z$ ..                                                                                                                                         |

### $^1\text{H}$ NMR of L

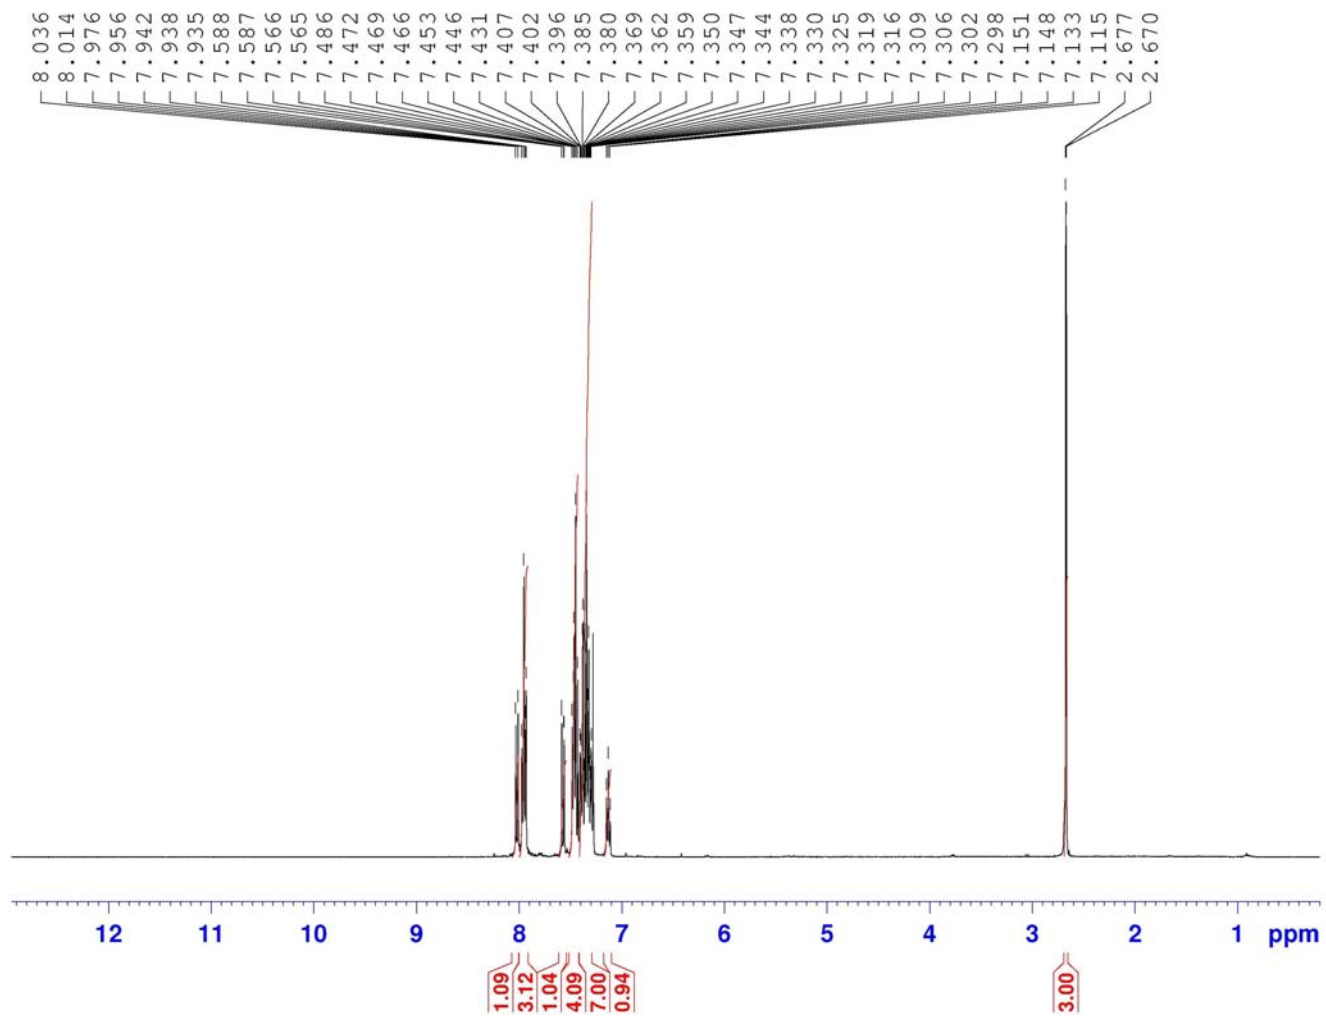

### $^{13}\text{C}$ NMR of L

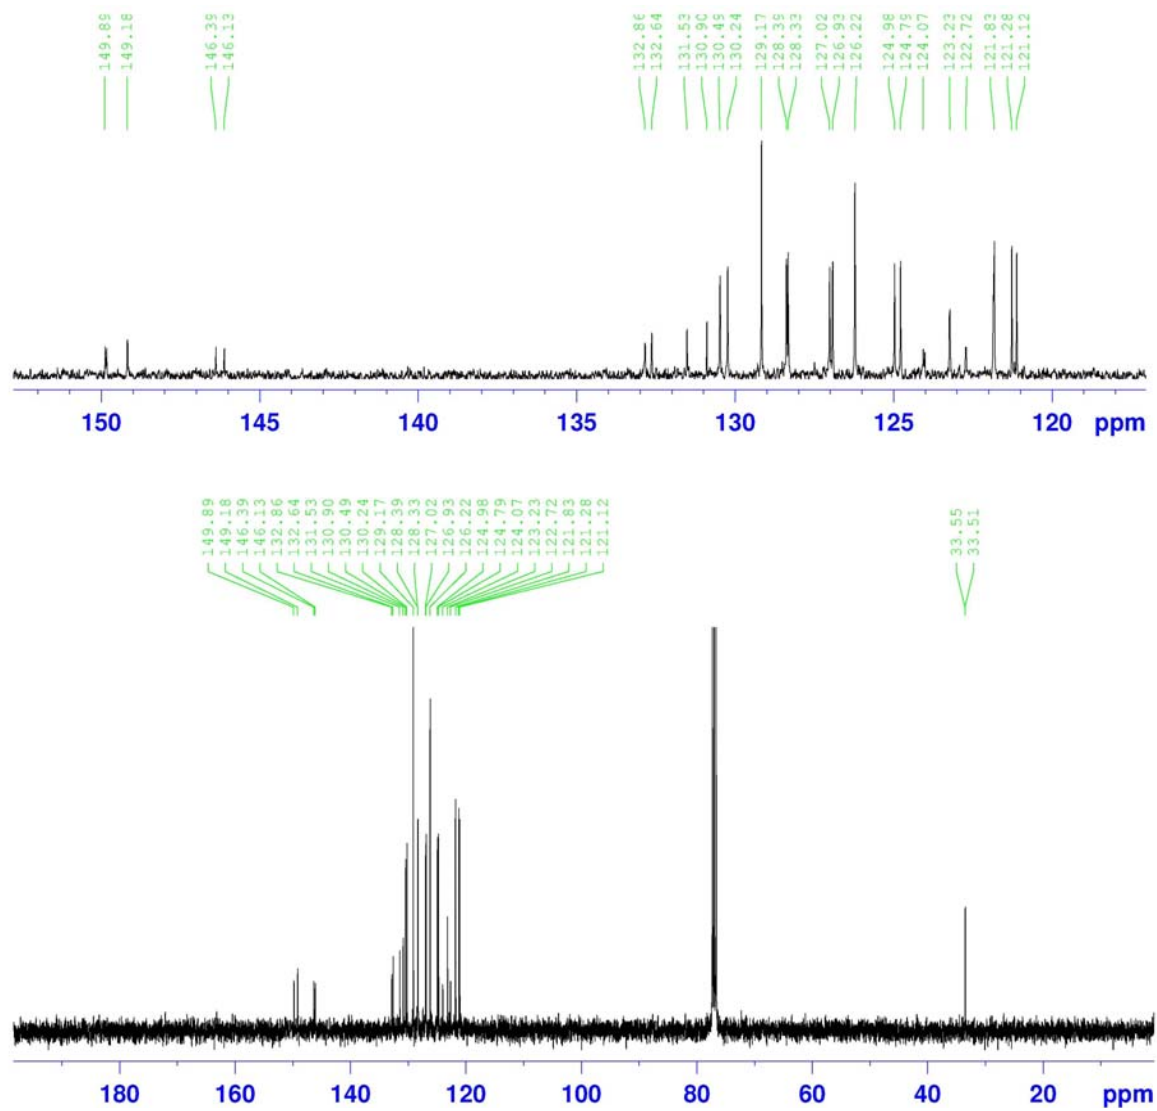

### $^{31}\text{P}$ NMR of L

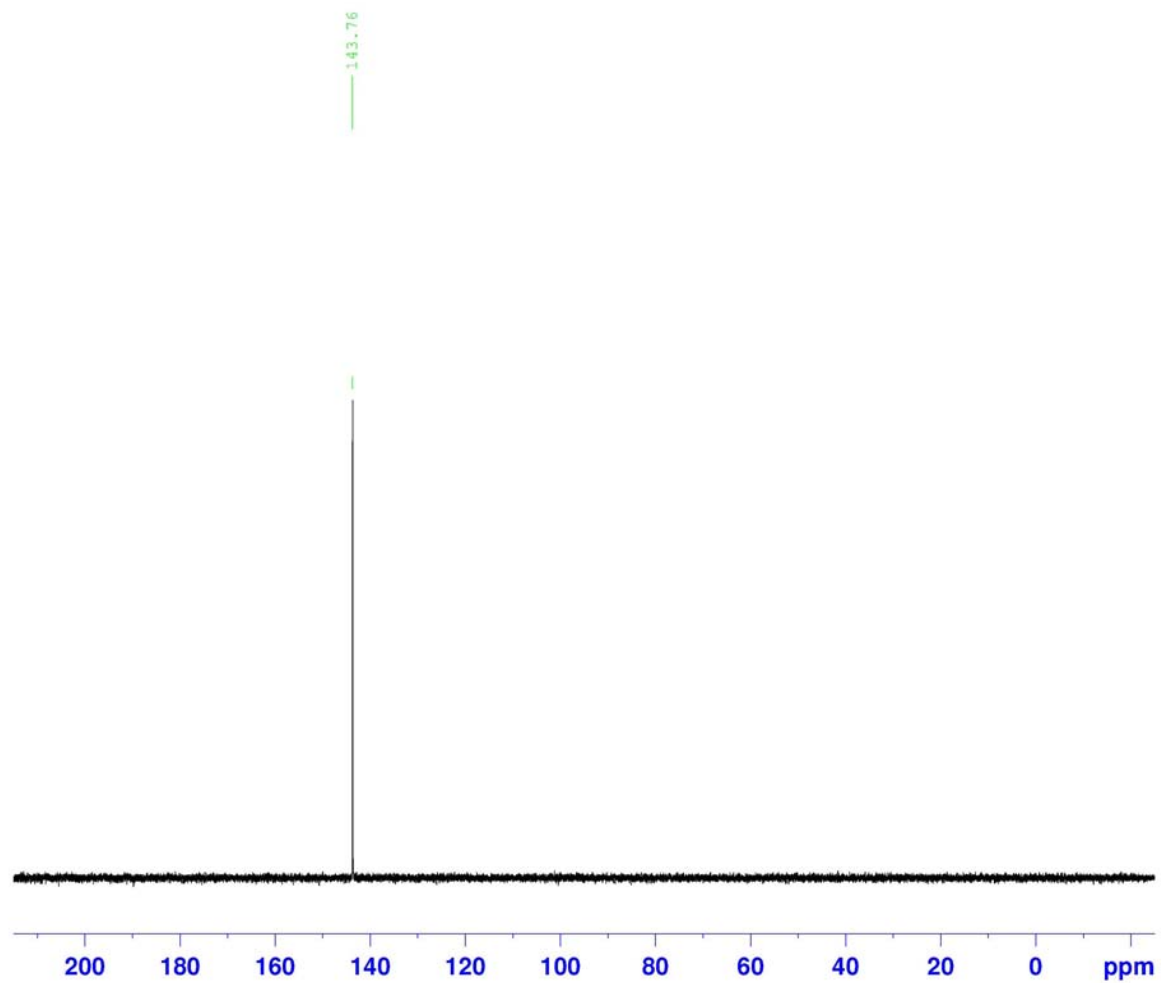

Supplement: c1cc11746g_2.pdf [file c1cc11746g_2.pdf]
